1 ***Developing and sharing polygenic risk scores for 4,206 brain imaging-derived***  
2 ***phenotypes for 400,000 UK Biobank subjects not participating in the imaging study***

3

4 **Running title: Imaging PRS in UK Biobank**

5

6 Xiaochen Yang<sup>1</sup>, Bingxuan Li<sup>2</sup>, Zirui Fan<sup>3</sup>, Dezheng Ding<sup>4</sup>, Juan Shu<sup>1</sup>, Marylyn D. Ritchie<sup>5,6</sup>,  
7 Gideon Nave<sup>7</sup>, Michael L. Platt<sup>7-9</sup>, Tengfei Li<sup>10,11</sup>, Hongtu Zhu<sup>12-15\*</sup>, and Bingxin Zhao<sup>1,3\*</sup>

8

9 <sup>1</sup>Department of Statistics, Purdue University, West Lafayette, IN 47907, USA. <sup>2</sup>Department of Computer  
10 Science, Purdue University, West Lafayette, IN 47907, USA. <sup>3</sup>Department of Statistics and Data Science,  
11 University of Pennsylvania, Philadelphia, PA 19104, USA. <sup>4</sup>Department of Electrical and Systems  
12 Engineering, University of Pennsylvania, Philadelphia, PA 19104, USA. <sup>5</sup>Department of Genetics, University  
13 of Pennsylvania, Philadelphia, PA 19104, USA. <sup>6</sup>Institute for Biomedical Informatics, University of  
14 Pennsylvania Perelman School of Medicine, Philadelphia, PA 19104, USA. <sup>7</sup>Marketing Department,  
15 University of Pennsylvania, Philadelphia, PA 19104, USA. <sup>8</sup>Department of Neuroscience, University of  
16 Pennsylvania, Philadelphia, PA 19104, USA. <sup>9</sup>Department of Psychology, University of Pennsylvania,  
17 Philadelphia, PA 19104, USA. <sup>10</sup>Department of Radiology, University of North Carolina at Chapel Hill, Chapel  
18 Hill, NC 27599, USA. <sup>11</sup>Biomedical Research Imaging Center, School of Medicine, University of North Carolina  
19 at Chapel Hill, Chapel Hill, NC 27599, USA. <sup>12</sup>Department of Biostatistics, University of North Carolina at  
20 Chapel Hill, Chapel Hill, NC 27599, USA. <sup>13</sup>Department of Genetics, University of North Carolina at Chapel  
21 Hill, Chapel Hill, NC 27599, USA. <sup>14</sup>Department of Computer Science, University of North Carolina at Chapel  
22 Hill, Chapel Hill, NC 27599, USA. <sup>15</sup>Department of Statistics and Operations Research, University of North  
23 Carolina at Chapel Hill, Chapel Hill, NC 27599, USA.

24

25 *\*Corresponding authors:*

26 Hongtu Zhu

27 3105C McGavran-Greenberg Hall, 135 Dauer Drive, Chapel Hill, NC 27599.

28 E-mail address: [htzhu@email.unc.edu](mailto:htzhu@email.unc.edu) Phone: (919) 966-7250

29

30 Bingxin Zhao

31 413 Academic Research Building, 265 South 37th Street, Philadelphia, PA 19104.

32 E-mail address: [bxzhao@upenn.edu](mailto:bxzhao@upenn.edu) Phone: (215) 898-8222

1 **Abstract**

2 The UK Biobank's brain imaging data is an essential resource for clinical research, but its  
3 cost and difficulty in obtaining limit the imaging study to only 100,000 participants,  
4 leaving the majority of UKB subjects without imaging data. However, because imaging-  
5 derived phenotypes (IDPs) are heritable, and most UKB subjects have genetic information  
6 available, it's possible to predict IDPs for UKB subjects outside the imaging study using  
7 genetic data. To this end, this study systematically developed and evaluated biobank-  
8 scale genetic polygenic risk scores (PRS) for 4,206 IDPs from multiple brain imaging  
9 modalities and processing pipelines. The results indicate that the majority of IDPs  
10 (64.76%, 2,774/4,206) were significantly predicted by PRS developed by subjects with  
11 both genetic and imaging data. Moreover, genetically predicted IDPs showed associations  
12 with a wide range of complex traits and diseases, with the patterns being consistent  
13 across different imaging pipelines. These findings suggest that genetic prediction through  
14 PRS is a cost-effective and practical way to make the UKB imaging study more beneficial  
15 to a broader population. The PRS data resources developed in this study have been made  
16 publicly available through Zenodo and will be returned to the UK Biobank.

17

18 **Keywords:** Brain imaging; Imaging-derived phenotypes; Polygenic risk scores; MRI; UK  
19 Biobank

1 The large-scale brain imaging data from the UK Biobank (UKB) imaging study has proven  
2 to be an immensely valuable resource for characterizing brain structural and functional  
3 organizations<sup>1,2</sup>. This data has been instrumental in establishing links with clinical  
4 biomarkers<sup>3,4</sup>, predicting brain aging<sup>5-7</sup>, and facilitating early disease detection<sup>8</sup>. Launched  
5 in 2014, the UKB imaging study reached a milestone in 2022 by scanning the multimodal  
6 brain magnetic resonance imaging (MRI) of its 50,000th participant. Although it is the  
7 world's largest imaging study, the UKB imaging study will ultimately include 100,000  
8 participants<sup>9</sup>, leaving 80% (400,000) of the half a million UKB subjects without imaging  
9 data. Given the cost and difficulty of collecting additional imaging data, it is crucial to  
10 develop strategies that extend the utility of the UKB imaging study to more participants  
11 in UKB and a wider population.

12

13 The polygenic risk scores (PRS) can be used to predict traits or disease risk for individuals  
14 by aggregating genetic information across the genome<sup>10,11</sup>. The development of  
15 numerous prediction methods<sup>12</sup>, reporting standards<sup>13</sup>, genetic data resources<sup>14</sup>, and  
16 data sharing platforms<sup>15</sup> has enabled the application of PRS to a wide variety of complex  
17 diseases and heritable traits. Both family and population-based studies have shown that  
18 variation in brain structure and function, as measured by brain MRI, are heritable<sup>2,16-18</sup>.  
19 Recent genome-wide association studies (GWAS)<sup>2,19-25</sup> have identified many genetic loci  
20 associated with brain imaging-derived phenotypes (IDPs). Consequently, PRS methods  
21 can be employed to predict brain IDPs for UKB subjects who are not part of the imaging  
22 study. A number of GWAS have investigated and reported the prediction accuracy (out  
23 of sample R-squared) of PRS for brain IDPs<sup>19,26,27</sup> in small-scale independent testing data,  
24 indicating that genetic data could partially recover variations in brain IDPs, especially  
25 when the PRS was developed and applied to the same population or research cohort.  
26 These pilot studies demonstrate that genetically-predicted IDPs can serve as valuable  
27 proxy imaging biomarkers in the absence of readily available brain MRI data.

28

29 In this study, we systematically developed and evaluated PRS for brain IDPs in UKB  
30 subjects without imaging data. We examined 4,206 brain IDPs from various imaging  
31 modalities and independent processing pipelines, including 3,905 traits generated by the  
32 UKB brain imaging team<sup>1,2,20</sup> (UKB Data Category 100, referred to as UKB-Oxford data

1 hereafter, <https://open.win.ox.ac.uk/ukbiobank/big40/>) and 301 traits processed by BIG-  
2 KP<sup>19,21,23</sup> (<https://bigkp.org/>). These imaging biomarkers spanned major MRI categories,  
3 such as structural MRI (sMRI, including regional brain volumes, cortical thicknesses, and  
4 surface areas), diffusion MRI (dMRI, with diffusion tensor imaging (DTI) parameters),  
5 resting-state functional MRI (rfMRI, featuring amplitude28 and functional connectivity  
6 traits), task-based functional MRI (tfMRI, using activation z-statistics), and susceptibility  
7 weighted brain MRI (incorporating regional median T2star). The Methods section and  
8 **Table S1** provide more detailed information. **Figure 1** presents an overview of the study  
9 design. The list of genetic variants and their weights for constructing PRS for brain IDPs  
10 can be found at [https://github.com/xcyang17/IPRS\\_UKB](https://github.com/xcyang17/IPRS_UKB).

11

## 12 **RESULTS**

### 13 **Developing biobank-scale PRS for 4,206 brain IDPs**

14 To develop and assess the PRS for brain IDPs in UKB subjects without imaging data, we  
15 employed data from individuals of white British ancestry with brain IDP information from  
16 UKB phases 1 to 3 data releases<sup>2,20,28</sup> for training (average  $n = 34,224$ , released up through  
17 2020). We generated GWAS summary statistics of brain IDPs, which were then used as  
18 input for the PRS models to create genetically predicted IDPs for all UKB subjects without  
19 imaging data (average  $n = 454,318$ ). An independent hold-out dataset containing brain  
20 IDP data served as a test set to evaluate the predictive performance of the generated IDPs  
21 (average  $n = 3,438$ ). We used PRS-CS<sup>29</sup> to construct the PRS, incorporating genotyping  
22 data from the UKB study, and 461,488 genetic variants were included in the prediction  
23 model after standard genetic data quality controls. The details can be found in **Methods**.

24

25 In summary, we discovered that 64.76% (2,774/4,206) of brain IDPs could be significantly  
26 predicted after controlling the false discovery rate (FDR) at 5% using the Benjamini-  
27 Hochberg procedure. Significant brain IDPs were present in both UKB-Oxford and BIG-KP  
28 across all brain MRI modalities (**Fig. 2A** and **Table S2**). Brain IDPs from the same imaging  
29 modality exhibited similar prediction accuracy ranges (**Fig. 2B**). For instance, the sMRI  
30 modality in BIG-KP consisted of 101 regional brain volumes generated by advanced  
31 normalization tools (ANTs)<sup>19,30</sup>, with an average prediction R-squared of 1.13%  
32 (s.e.=0.10%). The UKB-Oxford contained 1,437 sMRI IDPs, and most subcategories

1 displayed similar prediction R-squared ranges as the BIG-KP ANTs traits. Additionally,  
2 there were variations in prediction accuracy across different modalities. Among the three  
3 modalities in BIG-KP, dMRI traits (110 DTI parameters from the ENIGMA-DTI TBSS  
4 pipeline<sup>21,31,32</sup>) demonstrated significantly higher prediction accuracy compared to sMRI  
5 traits (101 ANTs regional brain volumes) or rfMRI traits (90 rfMRI traits using the  
6 Glasser360 atlas<sup>21,31,32</sup>,  $P < 2.2 \times 10^{-16}$ , Wilcoxon rank test). Furthermore, we assessed the  
7 consistency of prediction performance across different PRS methods by conducting the  
8 same analyses on the 301 BIG-KP traits using DBSLMM<sup>21,31,32</sup>. **Figure 2C** reveals that the  
9 prediction accuracy of the two methods was consistent across various traits (Correlation  
10 = 0.9278, **Table S2**). These results suggest that brain IDPs can be consistently predicted  
11 by different PRS prediction methods.

12

### 13 **PRS of brain IDPs were widely associated with complex traits**

14 Utilizing the PRS developed for brain IDPs, we conducted association analyses with 265  
15 phenotypes (**Table S3**) on UKB participants who initially lacked brain imaging data  
16 (**Methods**). Prior studies have identified associations between various complex traits and  
17 diseases using brain imaging data, such as intelligence, blood pressure, and education<sup>3,4</sup>.  
18 Our objective is to determine whether imaging-trait relationships can also be uncovered  
19 using the PRS of IDPs in the UKB non-imaging cohort. We outline the results for the 301  
20 IDPs from the BIG-KP below.

21

22 At the Bonferroni significance level ( $265 \times 301$  tests), we discovered 2,053 significant pairs  
23 between 97 complex traits and 258 PRS of brain IDPs ( $|\beta| > 0.0053$ ,  $P$  range =  $(1.75 \times 10^{-115}, 6.27 \times 10^{-7})$ ). Out of the 2,053 pairs discovered, 1,922 (93.62%) were replicated in an  
24 independent hold-out dataset (**Fig. S1** and **Table S4**). **Figure 3A** shows the pattern of  
25 significant IDP-trait connections across different phenotype groups and imaging  
26 modalities. The PRS of dMRI traits exhibited the highest percentage of associations,  
27 followed by those of sMRI traits and rfMRI traits. Associations were observed across a  
28 wide range of phenotypes, including blood biochemistry biomarkers, curated disease  
29 phenotypes<sup>33</sup>, spirometry, body composition by impedance, and mental health. We  
30 provide several examples below, all of which have been replicated.

31  
32

1 Significant associations were discovered and replicated between PRS and various disease-  
2 related phenotypes, including curated disease phenotypes, family health history, and  
3 health and medical history. Among the curated diseases, hyperthyroidism and  
4 hypothyroidism were found widely associated with all three imaging modalities ( $|\beta| >$   
5  $0.0104$ ,  $P < 6.02 \times 10^{-7}$ ). These results were consistent with recent studies<sup>34,35</sup> that  
6 reported significant changes in white matter radial diffusivity and axial diffusivity in adult  
7 patients with hyperthyroidism/hypothyroidism, which were known to be associated with  
8 memory dysfunction. In addition, hypertension and hypercholesterolemia were  
9 correlated with PRS of white matter structural connectivity traits and resting functional  
10 connectivity traits ( $|\beta| > 0.0102$ ,  $P < 5.30 \times 10^{-7}$ ). Hypertension was mostly correlated with  
11 PRS of DTI parameters involving the external capsule and the anterior limb of internal  
12 capsule tracts, and there was no association between hypertension and regional brain  
13 volumes, which was consistent with a previous study using the UKB brain IDPs<sup>36</sup>.  
14 Hypertension can lead to vascular stiffness and impaired cerebral perfusion, which in turn  
15 can cause microstructural white matter disruption and stroke<sup>37</sup>. There were significant  
16 associations between diabetes and PRS of all three modalities ( $|\beta| > 0.0105$ ,  $P < 5.92 \times 10^{-7}$ ),  
17 especially for the DTI parameters of the superior and inferior longitudinal fasciculus  
18 tracts and the inferior fronto-occipital fasciculus tract. These findings were consistent  
19 with two recent studies that investigated the effects of type 2 diabetes (T2D) on brain  
20 white matter<sup>38,39</sup>.

21

22 We found significant associations with multiple brain-related disorders and the family  
23 history of stroke and Alzheimer's disease ( $|\beta| > 0.0109$ ,  $P < 2.92 \times 10^{-7}$ ). Family history of  
24 Alzheimer's disease was significantly associated with PRS of DTI parameters of the  
25 hippocampal cingulum tracts, consistent with previous findings about changes in the DTI  
26 parameters of Alzheimer's disease patients<sup>40-42</sup>. Multiple sclerosis was correlated with all  
27 three imaging modalities, such as PRS of DTI parameters of the cingulum and fornix-stria  
28 terminalis tracts. Previous research has linked structural damage in the cingulum with  
29 subjective fatigue perception in multiple sclerosis<sup>43</sup>, and the fornix has been found to be  
30 correlated with cognitive impairment in multiple sclerosis patients<sup>44</sup>. We also uncovered  
31 widespread associations with brain-related complex traits, including mental health,  
32 alcohol use, smoking, cognitive functions, and education. All mental health traits were

1 associated with the PRS of regional brain volumes, and several of them (nervous feelings,  
2 visits to doctors/psychiatrists, and neuroticism score) were also widely associated with  
3 multiple DTI parameters ( $|\beta| > 0.0104$ ,  $P < 6.18 \times 10^{-7}$ ). Cognitive functions exhibited  
4 significant correlations with both DTI parameters and regional brain volumes ( $|\beta| >$   
5  $0.0101$ ,  $P < 5.93 \times 10^{-7}$ ). For instance, fluid intelligence was positively linked with fractional  
6 anisotropy of the uncinate fasciculus, whereas higher fractional anisotropy can improve  
7 interhemispheric transfer time, boost information processing speed, and lead to more  
8 efficient cognitive functioning and faster reaction<sup>45</sup>. In summary, PRS for brain IDPs  
9 provide the opportunity to identify biologically relevant connections between the brain  
10 and complex traits and diseases.

11

### 12 **Comparison of BIG-KP and UKB-Oxford IDPs in associations with phenotypes**

13 Using the PRS of 3,905 IDPs from the UKB-Oxford database, we repeated association  
14 analyses with the 265 phenotypes (**Methods**). Our results confirmed the consistency in  
15 PRS-phenotype associations produced by brain IDPs from BIG-KP and UKB-Oxford  
16 pipelines. We also discovered new associations from imaging modalities exclusive to the  
17 UKB-Oxford. Below we compared the results of UKB-Oxford with those of BIG-KP and  
18 highlighted some interesting new associations between PRS and phenotypes.

19

20 We found 14,541 significant pairs between 100 phenotypes and 2,814 PRS at the  
21 Bonferroni significance level ( $265 \times 3,905$  tests;  $|\beta| > 0.0056$ ,  $P$  range =  $(1.01 \times 10^{-135}$ ,  $4.83$   
22  $\times 10^{-8}$ )), 13,899 (95.58%) of which were replicated in an independent dataset (**Figs. 3B** and  
23 **S2**, and **Table S5**). Comparing **Figures 3A** and **3B**, both BIG-KP and UKB-Oxford PRS had  
24 the most associations in blood biochemistry, curated disease phenotypes, and mental  
25 health. The 1,439 sMRI traits in the UKB-Oxford consisted of multiple subcategories,  
26 including regional volumes, cortical areas, cortical grey-white contrast, cortical thickness,  
27 regional and tissue intensity, regional T2\*, and white matter hyperintensity volume (**Table**  
28 **S1**). A high correlation (0.9506) was found between the number of significant associations  
29 obtained from the BIG-KP ANTs traits and the UKB-Oxford regional volumes, suggesting  
30 that PRS of volumetric measures from the two different pipelines resulted in consistent  
31 patterns of phenotypic associations. The other subcategories of sMRI revealed additional  
32 associations that were not detected by regional volumes. For example, playing computer

1 games, a possibly addictive behavior, was found negatively associated with the area of  
2 the left inferior temporal ( $\beta = -0.0115$ ,  $P = 4.35 \times 10^{-8}$ ). It was reported that young male  
3 adults playing Internet video games had smaller inferior temporal gyri<sup>46</sup>. The associations  
4 detected by the 675 UKB-Oxford dMRI traits (tract-skeleton and probabilistic  
5 tractography traits) highly overlapped with those of the BIG-KP DTI parameters, with the  
6 correlation between the number of significant associations being 0.9797. The PRS of the  
7 dMRI traits had additional significant associations with rheumatoid arthritis and liver  
8 biomarkers (such as gamma-glutamyl transferase and direct bilirubin) in multiple white  
9 matter tracts ( $|\beta| > 0.0117$ ,  $P < 4.30 \times 10^{-8}$ ). Both gamma-glutamyl transferase and direct  
10 bilirubin were related to rheumatoid arthritis<sup>47,48</sup>, and previous studies have shown brain  
11 atrophy in rheumatoid arthritis patients<sup>49</sup>.

12

13 A wide range of phenotypes was associated with PRS of 1,777 rfMRI IDPs, including the  
14 family history of Alzheimer's disease, neuroticism, cardiovascular problems, and blood  
15 biomarkers ( $|\beta| > 0.0112$ ,  $P < 4.22 \times 10^{-8}$ ). For example, the family history of Alzheimer's  
16 disease was associated with the PRS in the visual network and the three core cognitive  
17 networks (the central executive, default mode, and salience networks) ( $\beta < -0.0115$ ,  $P <$   
18  $4.67 \times 10^{-8}$ ). Previous studies found that Alzheimer's disease progressively reduced visual  
19 functional network connectivity<sup>50</sup>, and MRI of the three core cognitive networks are  
20 known to be predictive of Alzheimer's disease<sup>51-53</sup>. We also detected multiple associations  
21 between neuroticism and the PRS of rfMRI IDPs in the cerebellum ( $|\beta| > -0.0131$ ,  $P < 2.08$   
22  $\times 10^{-8}$ ). Cerebellum plays an important role in motion control and is involved in cognitive  
23 functions, and previous studies showed functional connectivity of the cerebellum was  
24 highly involved in neuroticism<sup>54</sup>. Overall, the BIG-KP and UKB-Oxford IDPs provide  
25 consistent association patterns across different categories of phenotypes.

26

## 27 **Concordance between brain IDPs and their PRS**

28 In this section, we conducted an analysis of phenotypic associations between IDPs and  
29 phenotypes on UKB subjects with brain imaging data (average  $n = 34,870$ , **Methods**). We  
30 then compared the IDP-phenotype associations in the UKB imaging cohort with the PRS-  
31 phenotype associations in the UKB non-imaging cohort. At the FDR 5% level ( $265 \times 301$   
32 tests), 4,717 pairs between 206 phenotypes and 297 IDPs were discovered and replicated



1 ( $|\beta| > 0.0076$ ,  $P$  range =  $(1.18 \times 10^{-123}, 8.19 \times 10^{-3})$ ; **Figs. 4A** and **S3**, and **Table S6**). Out of  
2 these 4,717 IDP-phenotype associations, 1,383 pairs between 121 phenotypes and 266  
3 PRS were significant at the FDR 5% level (**Figs. 4B** and **S4**, and **Table S7**). That is, PRS  
4 associations recovered 29.32% (1,383/4,717) of the IDP associations, corresponding to  
5 58.74% (121/206) of the phenotypes and 89.56% (266/297) of the imaging traits. The  
6 distribution of the IDP signals in **Figure 4A** was in more diverse phenotype groups than  
7 that of the PRS signals in **Figure 4B**. Both IDP and PRS results were most abundant in blood  
8 biochemistry, curated disease phenotypes, and mental health traits, and the distribution  
9 of signals in each imaging modality was consistent. Among the 1,383 pairs that were  
10 significant in both IDP and PRS analyses, the correlation between their regression  
11 coefficients was 0.5685, and 78.16% (1,081/1,383) had regression coefficients in the same  
12 direction. The correlation among regression coefficients reduced to 0.4389 among all the  
13 4,717 IDP-phenotype associations. These results suggest that the majority of PRS  
14 associations have the same signs as the IDP associations and their regression coefficients  
15 are partially overlapped.

16  
17 Significant associations with various brain disorders, including stroke, multiple sclerosis,  
18 depression, and migraine, were identified by both brain IDPs ( $|\beta| > 0.0168$ ,  $P < 4.62 \times 10^{-3}$ )  
19 and their PRS ( $|\beta| > 0.0064$ ,  $P < 2.48 \times 10^{-3}$ ). In multiple white matter tracts, significant  
20 positive associations with stroke were found with mean diffusivity and residual diffusivity  
21 and their PRS (IDP  $\beta > 0.0327$ ,  $P < 1.21 \times 10^{-7}$ ; PRS  $\beta > 0.0064$ ,  $P < 2.48 \times 10^{-3}$ ). These  
22 findings are consistent with the known impairment of white matter and motor deficits  
23 following stroke<sup>55</sup>. Similar to a recent study<sup>56</sup>, the mean diffusivity of the superior fronto-  
24 occipital fasciculus and its PRS had positive associations with depression (IDP  $\beta = 0.0390$ ,  
25  $P = 1.24 \times 10^{-10}$ ; PRS  $\beta = 0.0079$ ,  $P = 1.89 \times 10^{-4}$ ). The brain-related complex traits that  
26 were associated with both brain IDPs and PRS included most mental health traits,  
27 cognitive functions, and electronic device usage, such as time spent watching TV, weekly  
28 use of mobile phone, and length of mobile phone use (IDP  $|\beta| > 0.0174$ ,  $P < 4.52 \times 10^{-3}$ ;  
29 PRS  $|\beta| > 0.0059$ ,  $P < 4.83 \times 10^{-3}$ ). In addition, we found that some brain orders were only  
30 significantly associated with brain IDPs, and not with PRS, such as bipolar disorder,  
31 Parkinson's disease, and epilepsy ( $|\beta| > 0.0015$ ,  $P < 7.68 \times 10^{-3}$ ). For example, there were  
32 strong negative associations between bipolar disorder and the mean fractional anisotropy

1 of the body and genus of corpus callosum ( $\beta < -0.0197$ ,  $P < 5.82 \times 10^{-4}$ ), which was  
2 consistent with findings reported in other studies<sup>57,58</sup>. In summary, we explored the  
3 overlaps between IDP and PRS phenotypic associations and confirmed that PRS can  
4 partially recover the imaging associations with brain-related diseases and complex traits.  
5 The PRS can be used as proxy imaging biomarkers when brain MRI data are unavailable.

6

## 7 **DISCUSSION**

8 In this study, we generated PRS for 4,206 brain IDPs for UKB subjects without imaging  
9 data. These PRS have been investigated in relation to a wide range of phenotypes and it  
10 was confirmed that they can provide biologically relevant information to brain-related  
11 complex traits and diseases. We found consistent predictive accuracy and association  
12 patterns across IDPs from different pipelines, such as the volumetric measures in UKB-  
13 Oxford and BIG-KP. The PRS of brain IDPs partially recovered previously known  
14 associations generated from imaging data. It is possible to detect almost 30% of the IDP  
15 associations using their PRS proxy data, and the majority of these PRS associations have  
16 the same sign as the IDP associations. We have provided the data resources so that users  
17 can easily reconstruct PRS in the UKB database.

18

19 When real brain imaging data are not available, the PRS can be used as genetically  
20 predicted variables for brain structure and function. However, as shown in our prediction  
21 and association analyses, the PRS is only able to partially reconstruct the imaging  
22 phenotypes. It has generally been observed that PRS has demonstrated imperfect  
23 performance in predicting the most complex traits and diseases, which can be attributed  
24 to a number of factors, including a limited number of training samples, heritability, and  
25 weak genetic effects<sup>59</sup>. Another challenge in PRS applications lies in ancestry and  
26 population differences. As the current UKB imaging cohort had the majority of the  
27 subjects of European ancestry, generating PRS in non-UKB and/or non-European studies  
28 may have further reduced performance<sup>60</sup>. More powerful PRS methods that better  
29 account for PRS limitations and cohort differences may result in more informative PRS for  
30 potential clinical applications.

31

## 32 **METHODS**

1 Methods are available in the **Methods** section.

2 *Note: One supplementary information pdf file and one supplementary table zip file are*  
3 *available.*

#### 5 **ACKNOWLEDGEMENTS**

6 The study has been partially supported by funding from the Wharton Dean's Research  
7 Fund and Analytics at Wharton, as well as start-up funds from Purdue Statistics  
8 Department. This research has been conducted using the UK Biobank resource  
9 (application number 76139), subject to a data transfer agreement. We would like to thank  
10 the individuals who represented themselves in the UK Biobank for their participation and  
11 the research teams for their efforts in collecting, processing, and disseminating these  
12 datasets. We would like to thank the research computing groups at the University of  
13 North Carolina at Chapel Hill, Purdue University, and the Wharton School of the University  
14 of Pennsylvania for providing computational resources and support that have contributed  
15 to these research results.

#### 17 **REFERENCES**

- 18 1. Alfaro-Almagro, F. *et al.* Image processing and Quality Control for the first 10,000  
19 brain imaging datasets from UK Biobank. *NeuroImage* **166**, 400-424 (2018).
- 20 2. Elliott, L.T. *et al.* Genome-wide association studies of brain imaging phenotypes  
21 in UK Biobank. *Nature* **562**, 210-216 (2018).
- 22 3. Miller, K.L. *et al.* Multimodal population brain imaging in the UK Biobank  
23 prospective epidemiological study. *Nature Neuroscience* **19**, 1523-1536 (2016).
- 24 4. Smith, S.M. & Nichols, T.E. Statistical challenges in "big data" human  
25 neuroimaging. *Neuron* **97**, 263-268 (2018).
- 26 5. Cole, J.H. Multimodality neuroimaging brain-age in UK biobank: relationship to  
27 biomedical, lifestyle, and cognitive factors. *Neurobiology of aging* **92**, 34-42  
28 (2020).
- 29 6. Cox, S.R. *et al.* Ageing and brain white matter structure in 3,513 UK Biobank  
30 participants. *Nature communications* **7**, 13629 (2016).

- 1 7. Peng, H., Gong, W., Beckmann, C.F., Vedaldi, A. & Smith, S.M. Accurate brain age  
2 prediction with lightweight deep neural networks. *Medical image analysis* **68**,  
3 101871 (2021).
- 4 8. Azevedo, T. *et al.* Identifying healthy individuals with Alzheimer neuroimaging  
5 phenotypes in the UK Biobank. *medRxiv* (2022).
- 6 9. Littlejohns, T.J. *et al.* The UK Biobank imaging enhancement of 100,000  
7 participants: rationale, data collection, management and future directions.  
8 *Nature communications* **11**, 1-12 (2020).
- 9 10. Lewis, C.M. & Vassos, E. Polygenic risk scores: from research tools to clinical  
10 instruments. *Genome medicine* **12**, 1-11 (2020).
- 11 11. Torkamani, A., Wineinger, N.E. & Topol, E.J. The personal and clinical utility of  
12 polygenic risk scores. *Nature Reviews Genetics* **19**, 581-590 (2018).
- 13 12. Ma, Y. & Zhou, X. Genetic prediction of complex traits with polygenic scores: a  
14 statistical review. *Trends in Genetics* **37**, 995-1011 (2021).
- 15 13. Wand, H. *et al.* Improving reporting standards for polygenic scores in risk  
16 prediction studies. *Nature* **591**, 211-219 (2021).
- 17 14. Uffelmann, E. *et al.* Genome-wide association studies. *Nature Reviews Methods*  
18 *Primers* **1**, 1-21 (2021).
- 19 15. Lambert, S.A. *et al.* The Polygenic Score Catalog as an open database for  
20 reproducibility and systematic evaluation. *Nature Genetics* **53**, 420-425 (2021).
- 21 16. Zhao, B. *et al.* Heritability of regional brain volumes in large-scale neuroimaging  
22 and genetic studies. *Cerebral Cortex* **29**, 2904-2914 (2018).
- 23 17. Kochunov, P. *et al.* Homogenizing estimates of heritability among SOLAR-Eclipse,  
24 OpenMx, APACE, and FPHI software packages in neuroimaging data. *Frontiers in*  
25 *Neuroinformatics* **13**, 16 (2019).
- 26 18. Thompson, P.M. *et al.* ENIGMA and global neuroscience: A decade of large-scale  
27 studies of the brain in health and disease across more than 40 countries.  
28 *Translational psychiatry* **10**, 1-28 (2020).
- 29 19. Zhao, B. *et al.* Genome-wide association analysis of 19,629 individuals identifies  
30 variants influencing regional brain volumes and refines their genetic co-  
31 architecture with cognitive and mental health traits. *Nature genetics* **51**, 1637-  
32 1644 (2019).

- 1 20. Smith, S.M. *et al.* An expanded set of genome-wide association studies of brain  
2 imaging phenotypes in UK Biobank. *Nature neuroscience* **24**, 737-745 (2021).
- 3 21. Zhao, B. *et al.* Common genetic variation influencing human white matter  
4 microstructure. *Science* **372**(2021).
- 5 22. Grasby, K.L. *et al.* The genetic architecture of the human cerebral cortex. *Science*  
6 **367**(2020).
- 7 23. Zhao, B. *et al.* Genetic influences on the intrinsic and extrinsic functional  
8 organizations of the cerebral cortex. *medRxiv* (2021).
- 9 24. Hofer, E. *et al.* Genetic correlations and genome-wide associations of cortical  
10 structure in general population samples of 22,824 adults. *Nature*  
11 *communications* **11**, 1-16 (2020).
- 12 25. Satizabal, C.L. *et al.* Genetic architecture of subcortical brain structures in 38,851  
13 individuals. *Nature genetics* **51**, 1624-1636 (2019).
- 14 26. Zhao, B. *et al.* Large-scale GWAS reveals genetic architecture of brain white  
15 matter microstructure and genetic overlap with cognitive and mental health  
16 traits (n = 17,706). *Molecular Psychiatry* (2019).
- 17 27. Zhao, B. *et al.* Common variants contribute to intrinsic human brain functional  
18 networks. *Nature Genetics* **in press** (2022).
- 19 28. Bycroft, C. *et al.* The UK Biobank resource with deep phenotyping and genomic  
20 data. *Nature* **562**, 203-209 (2018).
- 21 29. Ge, T., Chen, C.-Y., Ni, Y., Feng, Y.-C.A. & Smoller, J.W. Polygenic prediction via  
22 Bayesian regression and continuous shrinkage priors. *Nature Communications*  
23 **10**, 1776 (2019).
- 24 30. Avants, B.B. *et al.* A reproducible evaluation of ANTs similarity metric  
25 performance in brain image registration. *Neuroimage* **54**, 2033-2044 (2011).
- 26 31. Jahanshad, N. *et al.* Multi-site genetic analysis of diffusion images and voxelwise  
27 heritability analysis: A pilot project of the ENIGMA–DTI working group.  
28 *Neuroimage* **81**, 455-469 (2013).
- 29 32. Kochunov, P. *et al.* Multi-site study of additive genetic effects on fractional  
30 anisotropy of cerebral white matter: comparing meta and megaanalytical  
31 approaches for data pooling. *Neuroimage* **95**, 136-150 (2014).

- 1 33. Dey, R. *et al.* An efficient and accurate frailty model approach for genome-wide  
2 survival association analysis controlling for population structure and relatedness  
3 in large-scale biobanks. *bioRxiv* (2020).
- 4 34. Aslan, K. *et al.* Diffusion tensor imaging in hyperthyroidism: assessment of  
5 microstructural white matter abnormality with a tract-based spatial statistical  
6 analysis. *Acta Radiol* **61**, 1677-1683 (2020).
- 7 35. Singh, S. *et al.* Diffusion tensor tractography in hypothyroidism and its  
8 correlation with memory function. *J Neuroendocrinol* **26**, 825-33 (2014).
- 9 36. Suzuki, H. *et al.* Abnormal brain white matter microstructure is associated with  
10 both pre-hypertension and hypertension. *PLoS One* **12**, e0187600 (2017).
- 11 37. Karlsgodt, K.H. *et al.* Diffusion tensor imaging of the superior longitudinal  
12 fasciculus and working memory in recent-onset schizophrenia. *Biol Psychiatry* **63**,  
13 512-8 (2008).
- 14 38. Huang, L. *et al.* Abnormalities of Brain White Matter in Type 2 Diabetes Mellitus:  
15 A Meta-Analysis of Diffusion Tensor Imaging. *Front Aging Neurosci* **13**, 693890  
16 (2021).
- 17 39. Ma, T. *et al.* Gray and white matter abnormality in patients with T2DM-related  
18 cognitive dysfunction: a systemic review and meta-analysis. *Nutr Diabetes* **12**, 39  
19 (2022).
- 20 40. Bozzali, M. *et al.* Damage to the cingulum contributes to Alzheimer's disease  
21 pathophysiology by deafferentation mechanism. *Hum Brain Mapp* **33**, 1295-308  
22 (2012).
- 23 41. Rao, Y.L. *et al.* Hippocampus and its involvement in Alzheimer's disease: a  
24 review. *3 Biotech* **12**, 55 (2022).
- 25 42. Mayo, C.D. *et al.* Relationship between DTI metrics and cognitive function in  
26 Alzheimer's disease. *Frontiers in aging neuroscience* **10**, 436 (2019).
- 27 43. Pardini, M. *et al.* Cingulum bundle alterations underlie subjective fatigue in  
28 multiple sclerosis. *Mult Scler* **21**, 442-7 (2015).
- 29 44. Keser, Z. *et al.* Quantitative Limbic System Mapping of Main Cognitive Domains  
30 in Multiple Sclerosis. *Front Neurol* **9**, 132 (2018).
- 31 45. Penke, L. *et al.* Brain white matter tract integrity as a neural foundation for  
32 general intelligence. *Molecular psychiatry* **17**, 1026-1030 (2012).

- 1 46. Han, D.H. *et al.* Brain activity and desire for Internet video game play. *Compr*  
2 *Psychiatry* **52**, 88-95 (2011).
- 3 47. Spooner, R.J., Smith, D.H., Bedford, D. & Beck, P.R. Serum gamma-  
4 glutamyltransferase and alkaline phosphatase in rheumatoid arthritis. *J Clin*  
5 *Pathol* **35**, 638-41 (1982).
- 6 48. Peng, Y.F., Wang, J.L. & Pan, G.G. The correlation of serum bilirubin levels with  
7 disease activity in patients with rheumatoid arthritis. *Clin Chim Acta* **469**, 187-  
8 190 (2017).
- 9 49. Schrepf, A. *et al.* A multi-modal MRI study of the central response to  
10 inflammation in rheumatoid arthritis. *Nat Commun* **9**, 2243 (2018).
- 11 50. Huang, J., Beach, P., Bozoki, A. & Zhu, D.C. Alzheimer's Disease Progressively  
12 Reduces Visual Functional Network Connectivity. *J Alzheimers Dis Rep* **5**, 549-562  
13 (2021).
- 14 51. Daigle, K.M., Pietrzykowski, M.O., Waters, A.B., Swenson, L.P. & Gansler, D.A.  
15 Central Executive Network and Executive Function in Patients With Alzheimer's  
16 Disease and Healthy Individuals: Meta-Analysis of Structural and Functional MRI.  
17 *J Neuropsychiatry Clin Neurosci* **34**, 204-213 (2022).
- 18 52. Eyler, L.T. *et al.* Resting State Abnormalities of the Default Mode Network in Mild  
19 Cognitive Impairment: A Systematic Review and Meta-Analysis. *J Alzheimers Dis*  
20 **70**, 107-120 (2019).
- 21 53. Schultz, A.P. *et al.* Longitudinal degradation of the default/saliency network axis  
22 in symptomatic individuals with elevated amyloid burden. *Neuroimage Clin* **26**,  
23 102052 (2020).
- 24 54. Hsu, W.T., Rosenberg, M.D., Scheinost, D., Constable, R.T. & Chun, M.M. Resting-  
25 state functional connectivity predicts neuroticism and extraversion in novel  
26 individuals. *Soc Cogn Affect Neurosci* **13**, 224-232 (2018).
- 27 55. Puentes, S. *et al.* Internal capsule stroke in the common marmoset. *Neuroscience*  
28 **284**, 400-411 (2015).
- 29 56. van Velzen, L.S. *et al.* White matter disturbances in major depressive disorder: a  
30 coordinated analysis across 20 international cohorts in the ENIGMA MDD  
31 working group. *Mol Psychiatry* **25**, 1511-1525 (2020).

- 1 57. Favre, P. *et al.* Widespread white matter microstructural abnormalities in bipolar  
2 disorder: evidence from mega- and meta-analyses across 3033 individuals.  
3 *Neuropsychopharmacology* **44**, 2285-2293 (2019).
- 4 58. Barysheva, M., Jahanshad, N., Foland-Ross, L., Altshuler, L.L. & Thompson, P.M.  
5 White matter microstructural abnormalities in bipolar disorder: A whole brain  
6 diffusion tensor imaging study. *Neuroimage Clin* **2**, 558-68 (2013).
- 7 59. Dudbridge, F. Power and predictive accuracy of polygenic risk scores. *PLoS*  
8 *genetics* **9**, e1003348 (2013).
- 9 60. Wang, Y. *et al.* Theoretical and empirical quantification of the accuracy of  
10 polygenic scores in ancestry divergent populations. *Nature communications* **11**,  
11 1-9 (2020).
- 12 61. Sudlow, C. *et al.* UK biobank: an open access resource for identifying the causes  
13 of a wide range of complex diseases of middle and old age. *PLoS medicine* **12**,  
14 e1001779 (2015).
- 15 62. Glasser, M.F. *et al.* A multi-modal parcellation of human cerebral cortex. *Nature*  
16 **536**, 171-178 (2016).
- 17 63. Ji, J.L. *et al.* Mapping the human brain's cortical-subcortical functional network  
18 organization. *Neuroimage* **185**, 35-57 (2019).
- 19 64. Beckmann, C.F. & Smith, S.M. Probabilistic independent component analysis for  
20 functional magnetic resonance imaging. *IEEE transactions on medical imaging*  
21 **23**, 137-152 (2004).
- 22 65. Hyvarinen, A. Fast and robust fixed-point algorithms for independent component  
23 analysis. *IEEE transactions on Neural Networks* **10**, 626-634 (1999).
- 24 66. Jiang, L. *et al.* A resource-efficient tool for mixed model association analysis of  
25 large-scale data. *Nat Genet* **51**, 1749-1755 (2019).
- 26 67. Yang, S. & Zhou, X. Accurate and Scalable Construction of Polygenic Scores in  
27 Large Biobank Data Sets. *Am J Hum Genet* **106**, 679-693 (2020).

28

## 29 **METHODS**

### 30 **Imaging traits.**



1 The data used in our study was obtained from the UK Biobank (UKB) study, which  
2 recruited around 500,000 individuals between the ages of 40 and 69 between 2006 and  
3 2010<sup>61</sup> (<https://www.ukbiobank.ac.uk/>). The ethics approval of the UKB study was  
4 obtained from the North West Multicentre Research Ethics Committee (approval number:  
5 11/NW/0382). We used a total of 4,206 brain imaging-derived phenotypes (IDPs) from  
6 the UKB study, which consisted of 301 BIG-KP<sup>19,21,23</sup> (<https://bigkp.org/>) and 3,905 UKB-  
7 Oxford<sup>1,2,20</sup> (<https://open.win.ox.ac.uk/ukbiobank/big40/>) traits. BIG-KP traits were  
8 divided into three groups. First, we obtained 101 regional brain volumes<sup>19</sup> from structural  
9 MRI (sMRI) images by applying the advanced normalization tools<sup>30</sup> (ANTs). Second, we  
10 generated 110 tract-averaged diffusion tensor imaging (DTI) parameters from diffusion  
11 MRI (dMRI) using the ENIGMA-DTI pipeline<sup>31,32</sup>. Third, for resting-state fMRI (rsfMRI), we  
12 partitioned the cerebral cortex into 360 brain areas using the Glasser360 atlas<sup>62</sup>. We  
13 obtained 90 functional activity (amplitude) and functional connectivity (edge) traits for 12  
14 functional networks<sup>63</sup>. The UKB-Oxford had 1,437 IDPs from sMRI, 675 from dMRI, 1,777  
15 from rsfMRI, and 16 from task-based functional MRI (tfMRI). The sMRI IDPs consisted of  
16 FIRST (Category 1102), FAST (Category 1101), FreeSurfer ASEG (Category 190), FreeSurfer  
17 BA ex vivo (Category 195), FreeSurfer a2009s (Category 197), FreeSurfer DKT (Category  
18 196), FreeSurfer desikan gw (Category 194), FreeSurfer desikan pial (Category 193),  
19 FreeSurfer desikan white (Category 192), FreeSurfer subsegmentation (Category 191),  
20 regional T2\* (Category 109), and white matter hyperintensity volume (Category 112). The  
21 675 dMRI IDPs included 432 from Category 134 and 243 from Category 135. The 1,777  
22 rsfMRI IDPs included 76 amplitude (node) traits and 1,701 functional connectivity (edge)  
23 traits from whole brain spatial independent component analysis<sup>1,64,65</sup> (Category 111).  
24 Lastly, there were 16 tsfMRI IDPs from Category 106. The image acquisition,  
25 preprocessing procedures, and quality controls were detailed in the UKB Brain Imaging  
26 Documentation ([https://biobank.ctsu.ox.ac.uk/crystal/crystal/docs/brain\\_mri.pdf](https://biobank.ctsu.ox.ac.uk/crystal/crystal/docs/brain_mri.pdf)). See  
27 **Table S1** for the complete ID list of all brain IDPs.

28

### 29 **PRS constructions.**

30 We performed the following genetic quality controls for the set of subjects with both  
31 brain IDPs and genetic data<sup>23</sup>: 1) removed individuals with missing genotype rate > 0.1; 2)  
32 removed variants with missing genotype rate > 0.1; 3) removed variants with minor allele

1 frequency (MAF) < 0.01; and 4) removed variants that failed the Hardy-Weinberg test for  
2 equilibrium at  $1 \times 10^{-7}$  level. Using individuals of white British ancestry, the GWAS was  
3 performed using linear mixed effect models via fastGWA<sup>66</sup> (average  $n = 34,224$ ). The  
4 adjusting covariates included age (at imaging), age-squared, sex, the interaction between  
5 age and sex, the interaction between age-squared and sex, first 40 genetic principal  
6 components<sup>28</sup> (PCs), estimated total intracranial volume (eTIV), head motion  
7 measurements and their squares, brain position measurements and their squares, and  
8 volumetric scaling. Additionally, for regional brain volume IDPs, the total brain volume  
9 (TBV) was included as an adjusting covariate. For TBV, the eTIV and volumetric scaling  
10 were not included as covariates. With the GWAS summary statistics as input, we applied  
11 PRS-CS<sup>29</sup> and DBSLMM<sup>67</sup> to obtain the effect sizes. The hyperparameters of both methods  
12 were the default values and/or the automatically tuned values. We then used PLINK to  
13 generate risk scores in testing data by summarizing across genetic variants, weighed by  
14 their effect sizes estimated from PRS-CS<sup>29</sup> and DBSLMM<sup>67</sup>.

15

16 The prediction accuracy of PRS was measured by the incremental R-squared, which was  
17 the additional phenotypic variation that can be explained by the PRS while adjusting for  
18 the effects of covariates in a linear regression model. The covariates included age, age-  
19 squared, sex, the interaction between age and sex, the interaction between age-squared  
20 and sex, and the first 40 genetic PCs. The prediction accuracy was estimated in a dataset  
21 consisting of unrelated UKB individuals of non-British ancestry with brain IDP data  
22 (average  $n = 3,200$ ).

23

#### 24 **PRS-phenotype and IDP- phenotype association analyses.**

25 We employed a discovery-replication approach to examine associations between PRS and  
26 phenotypes in UKB participants without brain IDPs. We randomly selected 70% of UKB  
27 British white individuals (average  $n = 202,893$ ) as the discovery dataset for PRS-phenotype  
28 associations, while the remaining 30% of UKB British white individuals, all UKB white but  
29 non-British individuals, and all non-white individuals (average  $n = 129,333$ ) were used as  
30 the replication dataset. We treated the values greater than five times the median  
31 absolute deviation from the median as outliers and removed these values. A total of 265  
32 UKB phenotypes were tested, which represented a wide range of traits from various trait

1 domains. Specifically, the 265 UKB phenotypes included 24 mental health traits (Category  
2 100060), 5 cognitive traits (Category 100026), 12 physical activity traits (Category  
3 100054), 6 electronic device use traits (Category 100053), 8 sun exposure traits (Category  
4 100055), 3 sexual factor traits (Category 100056), 3 social support traits (Category  
5 100061), 12 family history of diseases (Category 100034), 21 diet traits (Category 100052),  
6 9 alcohol drinking traits (Category 100051), 6 smoking traits (Category 100058), 34 blood  
7 biochemistry biomarkers (Category 17518), 3 blood pressure traits (Category 100011), 3  
8 spirometry traits (Category 100020), 32 early life factors (Categories 135, 100033,  
9 100034, and 100072), 9 greenspace and coastal proximity (Category 151), 2 hand grip  
10 strength (Category 100019), 13 residential air pollution traits (Category 114), 5 residential  
11 noise pollution traits (Category 115), 2 body composition traits by impedance (Category  
12 100009), 4 health and medical history traits (Category 100036), 3 female specific factors  
13 (Category 100069), 1 education trait (Category 100063), and 57 curated disease  
14 phenotypes based on Dey, et al.<sup>33</sup> (**Table S3**).

15

16 Association testing was then conducted to examine the relationship between the 4,206  
17 IDP-derived PRS generated by PRS-CS and the 265 UKB phenotypes. To investigate the  
18 PRS-phenotype associations, we conducted a linear regression analysis, adjusting for the  
19 same set of covariates separately in the discovery set and the replication set. The adjusted  
20 covariates included age, age-squared, sex, the interaction between age and sex, the  
21 interaction between age-squared and sex, and 40 genetic PCs. Specifically, we regressed  
22 the IDP-derived PRS onto the UKB phenotypes and calculated *P* values using a two-sided  
23 t-test. We prioritized the results that met the following three criteria: 1) significant after  
24 Bonferroni correction in the discovery dataset, 2) significant at a nominal significance  
25 level (0.05) in the replication dataset, and 3) had regression coefficients with matching  
26 directions in both the discovery and replication datasets.

27

28 We analyzed the associations between the 301 BIG-KP IDPs and the 265 UKB phenotypes  
29 in a discovery-replication design. Specifically, the discovery set included all unrelated  
30 white British subjects from UKB phases 1 to 3 data releases, which was similar to the  
31 training GWAS dataset. The replication set consisted of all the rest of the non-discovery  
32 unrelated subjects from UKB phases 1 to 3 data releases and all unrelated subjects from

1 UKB phase 4 data release. We performed linear regression on the discovery dataset and  
2 the replication dataset, respectively, by regressing the BIG-KP IDP on the UKB phenotype.  
3 We adjusted for the same set of covariates as used in the GWAS analysis. We reported *P*  
4 values from the two-sided t-test and prioritized those that met the following three  
5 criteria: 1) significant in the discovery dataset after controlling the false discovery rate  
6 (FDR) at a 5% level with the Benjamini-Hochberg procedure, 2) significant at a nominal  
7 significance level in the replication dataset, and 3) had regression coefficients with  
8 matching directions in both the discovery and replication datasets.

9

#### 10 **Code availability.**

11 We made use of publicly available software and tools. The list of genetic variants and their  
12 weights used to construct PRS for brain IDPs are available at  
13 [https://github.com/xcyang17/IPRS\\_UKB](https://github.com/xcyang17/IPRS_UKB).

14

#### 15 **Data availability.**

16 The PRS data resources have been made publicly available at Zenodo  
17 (<https://doi.org/10.5281/zenodo.7709788>). The individual-level data used in this study  
18 can be obtained from <https://www.ukbiobank.ac.uk/>.

19

#### 20 **Figure legends.**

##### 21 **Fig. 1 Study overview.**

22 An overview of the study design. From raw brain imaging data, 4,206 brain imaging-  
23 derived phenotypes (IDPs) were extracted using various pipelines in previous UKB-Oxford  
24 and BIG-KP projects. Multiple brain magnetic resonance imaging (MRI) modalities were  
25 considered, including structural MRI, diffusion MRI, resting-state functional MRI (rfMRI),  
26 and task-based functional MRI (tfMRI). PRS of brain IDPs were generated for non-imaging  
27 subjects (subjects without brain MRI data) using genetic predictors. Prediction accuracy  
28 was examined and associations with a wide range of phenotypes were performed.

29

##### 30 **Fig. 2 Prediction analysis.**

31 **(A)** The proportion of brain IDPs significantly predicted by their corresponding PRS  
32 (generated by PRS-CS) in each imaging modality, after controlling the false discovery rate

1 (FDR) rate at 5% by the Benjamini-Hochberg procedure and at the Bonferroni 0.05 level,  
2 respectively. **(B)** The incremental prediction accuracy of PRS (generated by PRS-CS) in  
3 each imaging modality. **(C)** Comparison of incremental prediction accuracy of PRS using  
4 PRS-CS and DBSLMM.

5

6 **Fig. 3 PRS-phenotype association analysis.**

7 **(A)** We visualized the pattern of significant PRS-phenotype associations (after Bonferroni  
8 correction for multiple testing) between various groups of UKB phenotypes (upper panel)  
9 and three imaging modalities in BIG-KP (lower panel). **(B)** We visualized the pattern of  
10 significant PRS-phenotype associations (after Bonferroni correction for multiple testing)  
11 between various groups of UKB phenotypes (upper panel) and four imaging modalities in  
12 UKB-Oxford (lower panel). Each segment in the upper half of the visualization represents  
13 the number of significant signals found within a phenotype group, while each segment in  
14 the lower half represents the number of significant signals found within an imaging  
15 modality. These segments are color-coded to correspond to either a phenotype group or  
16 an imaging modality.

17

18 **Fig. 4 Phenotypic associations with PRS and IDPs.**

19 **(A)** We visualized the pattern of significant IDP-phenotype associations (at a false  
20 discovery rate of 5% level) between various groups of UKB phenotypes (upper panel) and  
21 three imaging modalities in BIG-KP (lower panel). **(B)** We visualized the pattern of  
22 significant PRS-phenotype associations (at a false discovery rate of 5% level) between  
23 various groups of UKB phenotypes (upper panel) and three imaging modalities in BIG-KP  
24 (lower panel). Each segment in the upper half of the visualization represents the number  
25 of significant signals found within a phenotype group, while each segment in the lower  
26 half represents the number of significant signals found within an imaging modality. These  
27 segments are color-coded to correspond to either a phenotype group or an imaging  
28 modality.

29

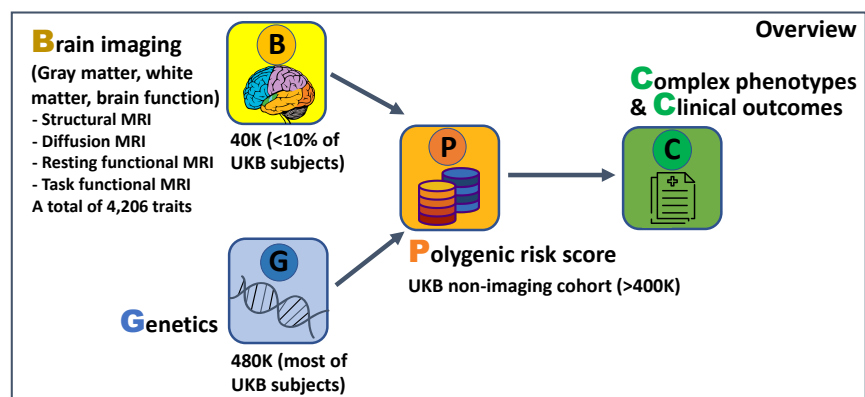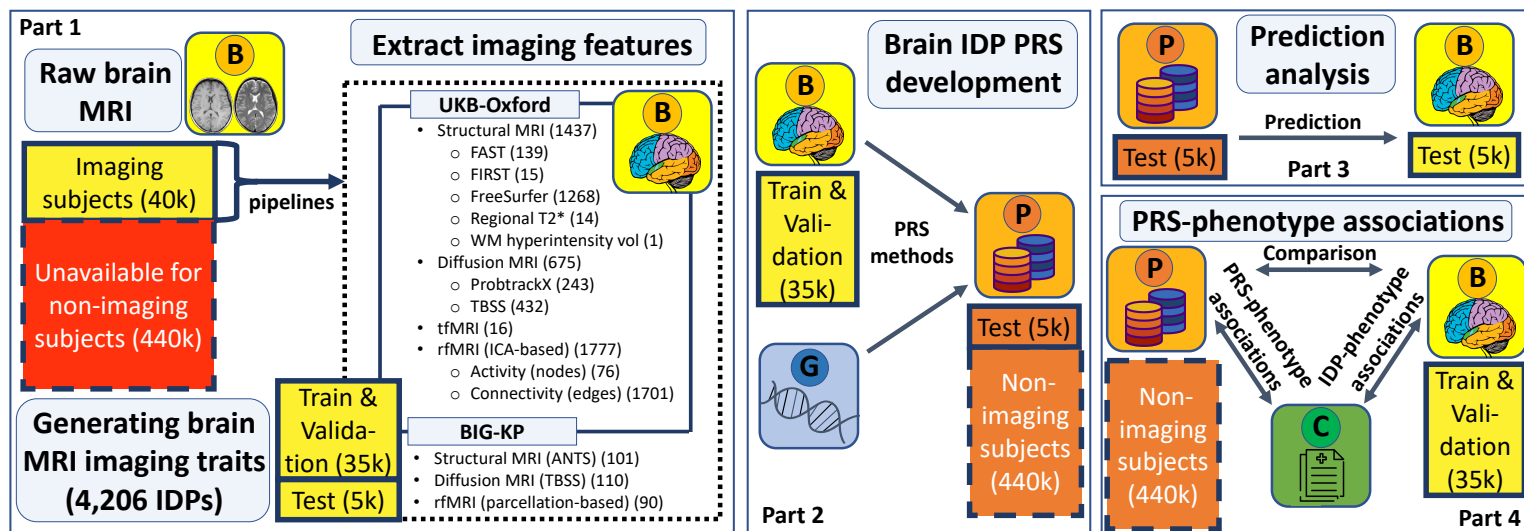

Figure 1

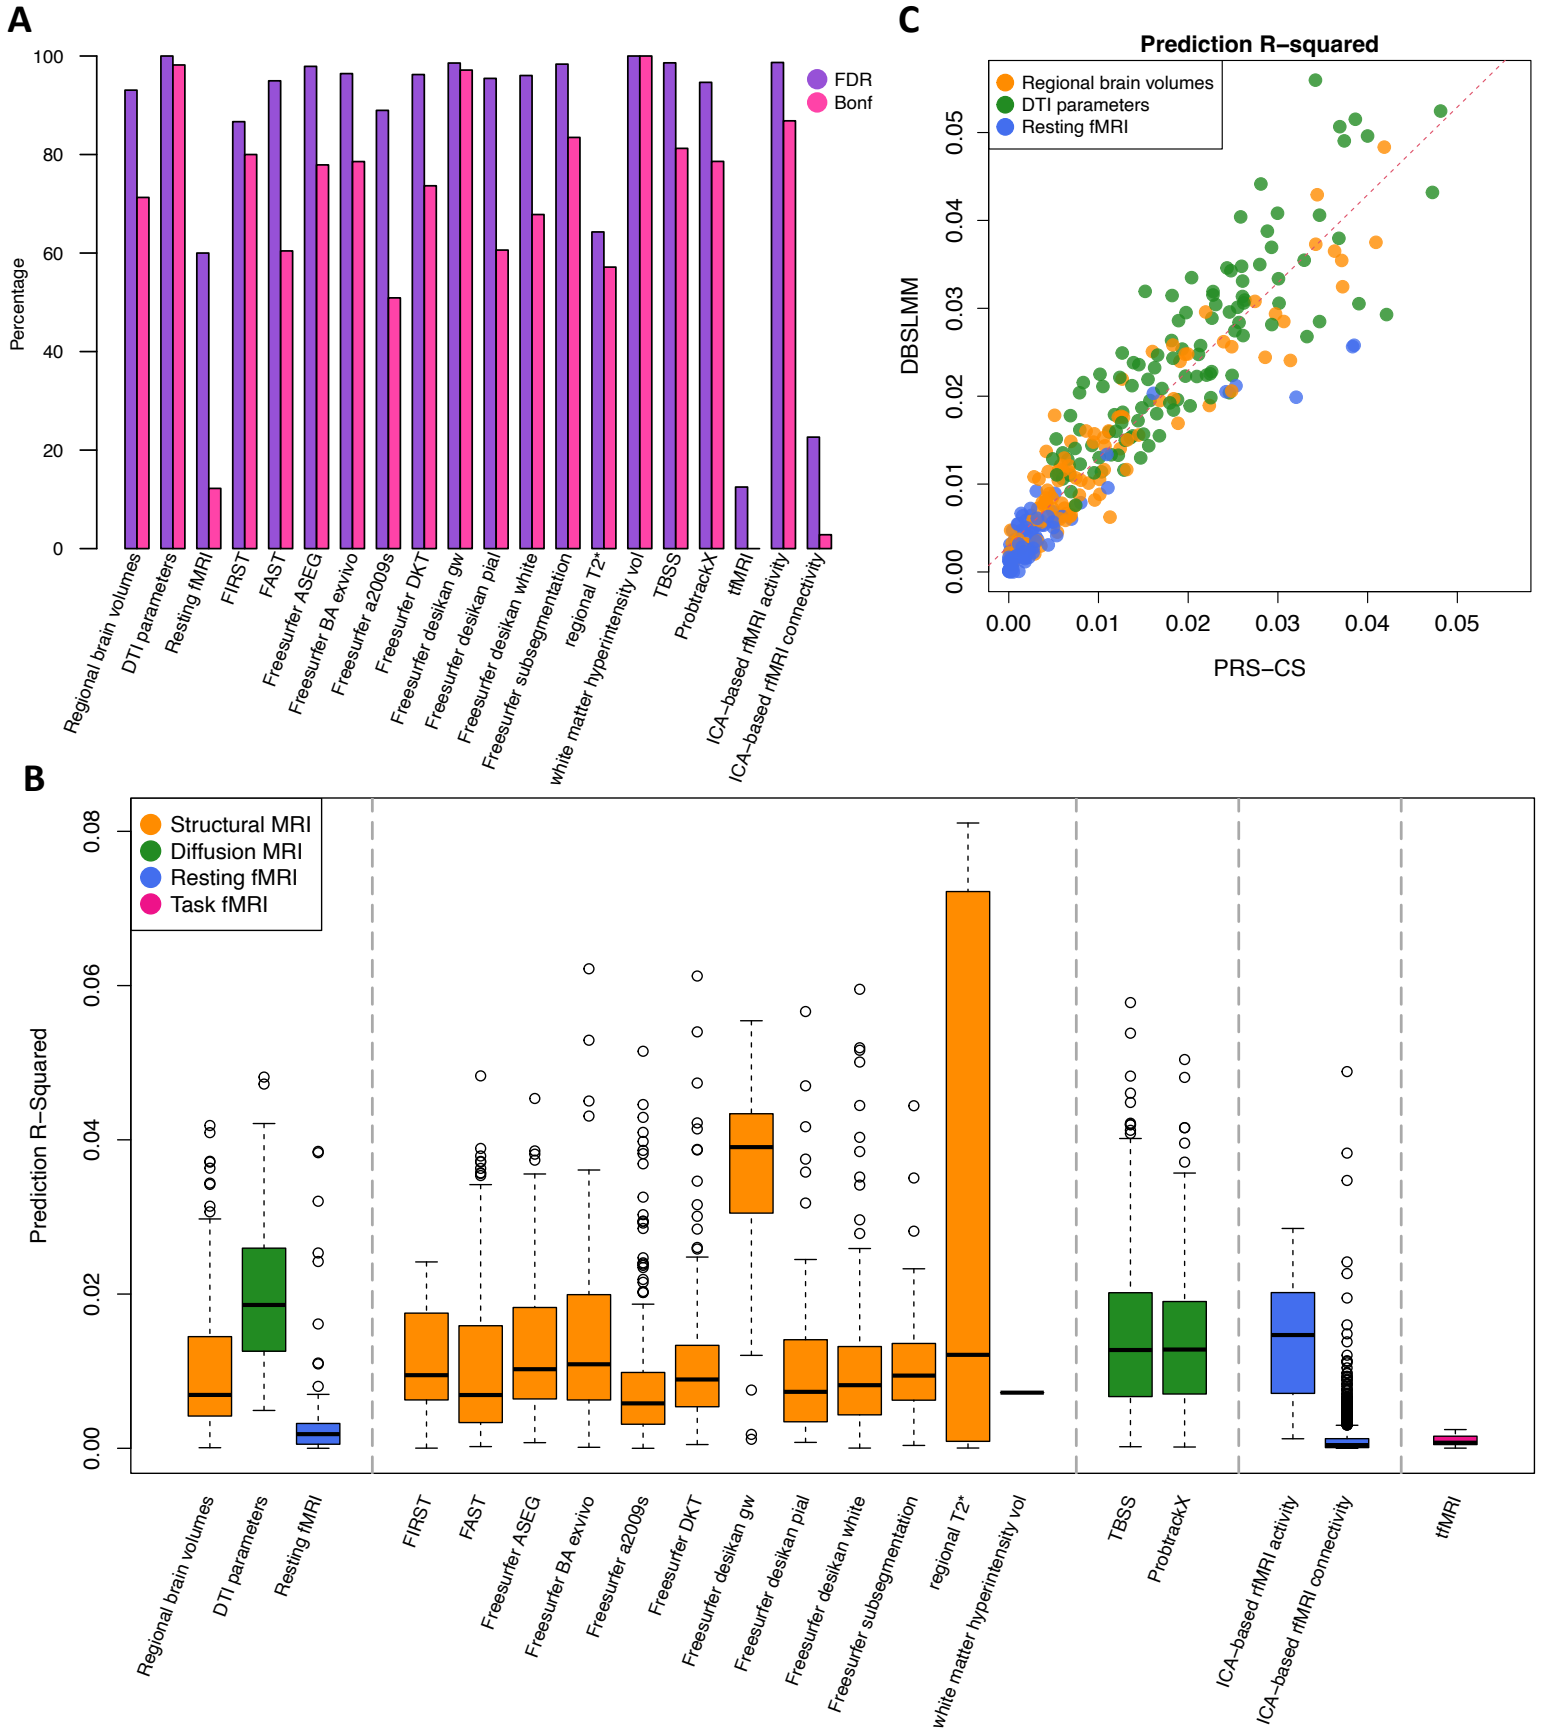

Figure 2

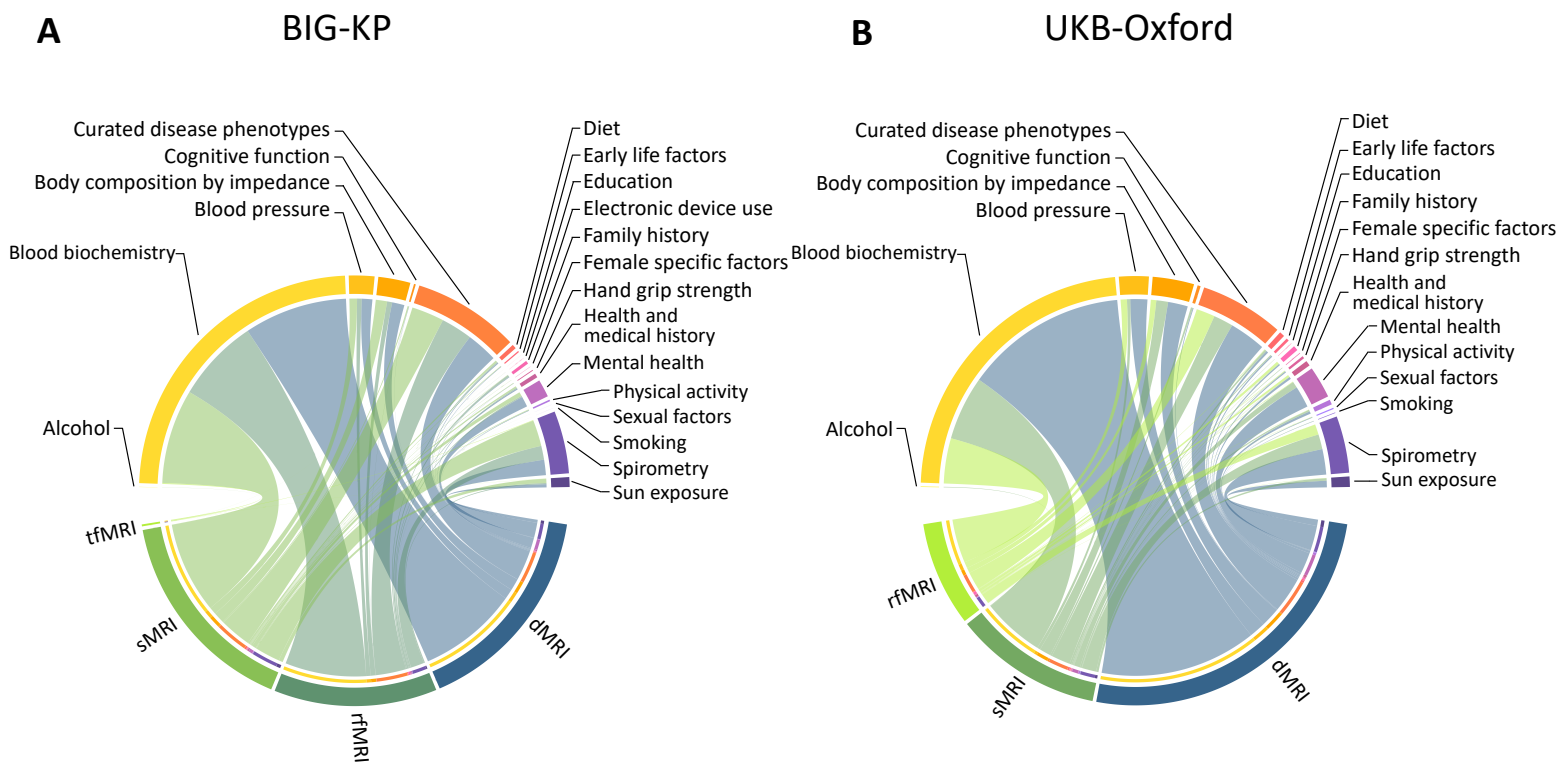

Figure 3



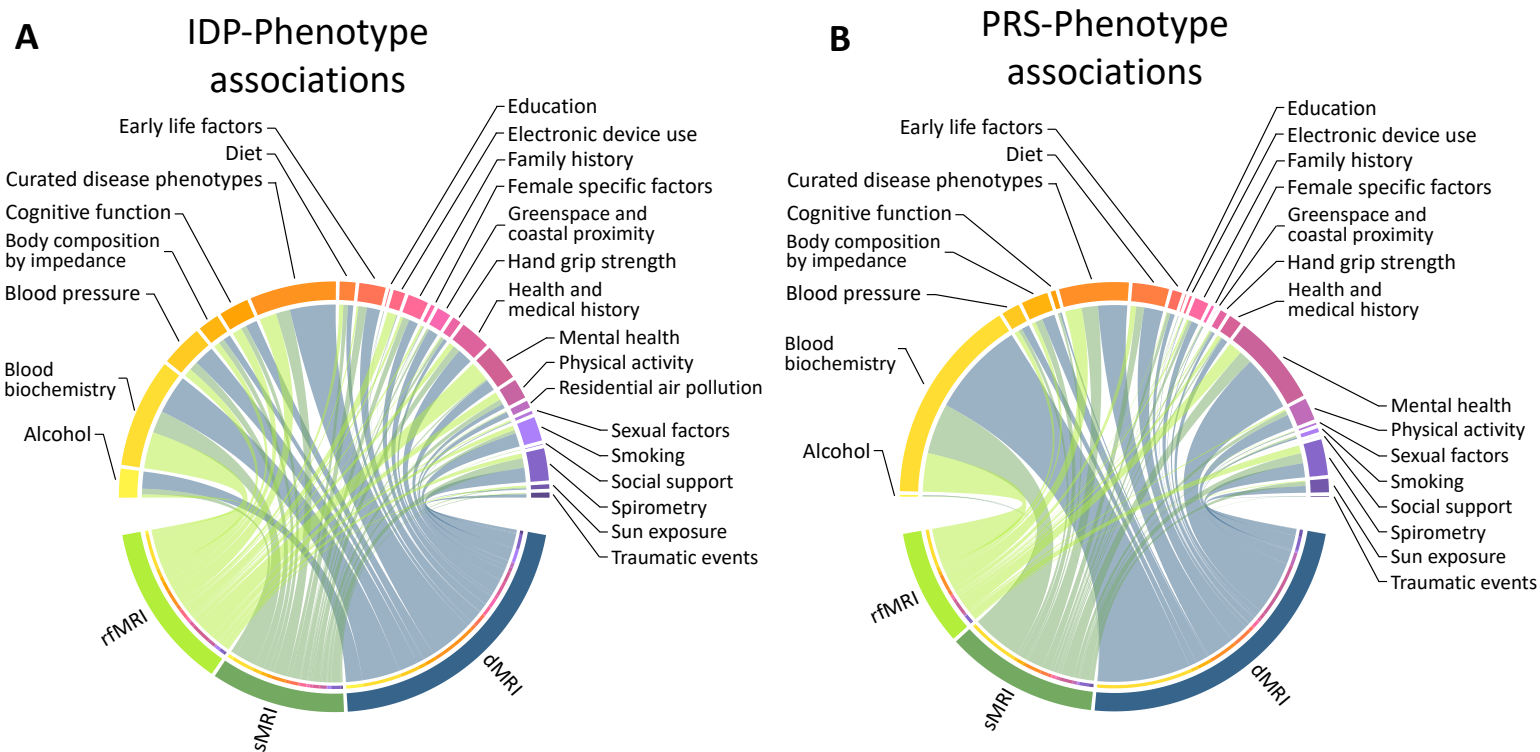

Figure 4
