# 1 Multi-organ imaging-derived polygenic indexes for brain and body health

2

## 3 Running title: Brain and body IDP index

4

5 Xiaochen Yang<sup>1\*</sup>, Patrick F. Sullivan<sup>2</sup>, Bingxuan Li<sup>3</sup>, Zirui Fan<sup>4</sup>, Dezheng Ding<sup>5</sup>, Juan Shu<sup>1</sup>,  
6 Yuxin Guo<sup>6</sup>, Peristera Paschou<sup>6</sup>, Jingxuan Bao<sup>7,8</sup>, Li Shen<sup>7</sup>, Marylyn D. Ritchie<sup>9,10</sup>, Gideon  
7 Nave<sup>11</sup>, Michael L. Platt<sup>11-13</sup>, Tengfei Li<sup>14,15</sup>, Hongtu Zhu<sup>2,15-18\*</sup>, and Bingxin Zhao<sup>4,10,19-22\*\*</sup>

8

9 <sup>1</sup>Department of Statistics, Purdue University, West Lafayette, IN 47907, USA.

10 <sup>2</sup>Department of Genetics, University of North Carolina at Chapel Hill, Chapel Hill, NC 27599, USA.

11 <sup>3</sup>UCLA Samueli School of Engineering, Los Angeles, CA 90095, USA.

12 <sup>4</sup>Department of Statistics and Data Science, University of Pennsylvania, Philadelphia, PA 19104,  
13 USA.

14 <sup>5</sup>Department of Electrical and Systems Engineering, University of Pennsylvania, Philadelphia, PA  
15 19104, USA.

16 <sup>6</sup>Department of Biological Sciences, Purdue University, West Lafayette, IN 47907, USA.

17 <sup>7</sup>Department of Biostatistics, Epidemiology and Informatics, University of Pennsylvania,  
18 Philadelphia, PA 19104, USA.

19 <sup>8</sup>Graduate Group in Genomics and Computational Biology, University of Pennsylvania,  
20 Philadelphia, PA, USA.

21 <sup>9</sup>Department of Genetics, University of Pennsylvania, Philadelphia, PA 19104, USA.

22 <sup>10</sup>Institute for Biomedical Informatics, University of Pennsylvania Perelman School of Medicine,  
23 Philadelphia, PA 19104, USA.

24 <sup>11</sup>Marketing Department, University of Pennsylvania, Philadelphia, PA 19104, USA.

25 <sup>12</sup>Department of Neuroscience, University of Pennsylvania, Philadelphia, PA 19104, USA.

26 <sup>13</sup>Department of Psychology, University of Pennsylvania, Philadelphia, PA 19104, USA.

27 <sup>14</sup>Department of Radiology, University of North Carolina at Chapel Hill, Chapel Hill, NC 27599, USA.

28 <sup>15</sup>Biomedical Research Imaging Center, School of Medicine, University of North Carolina at Chapel  
29 Hill, Chapel Hill, NC 27599, USA.

30 <sup>16</sup>Department of Biostatistics, University of North Carolina at Chapel Hill, Chapel Hill, NC 27599,  
31 USA.

1 <sup>17</sup>Department of Computer Science, University of North Carolina at Chapel Hill, Chapel Hill, NC  
2 27599, USA.

3 <sup>18</sup>Department of Statistics and Operations Research, University of North Carolina at Chapel Hill,  
4 Chapel Hill, NC 27599, USA.

5 <sup>19</sup>Applied Mathematics and Computational Science Graduate Group, University of Pennsylvania,  
6 Philadelphia, PA 19104, USA.

7 <sup>20</sup>Center for AI and Data Science for Integrated Diagnostics, Perelman School of Medicine,  
8 University of Pennsylvania, Philadelphia, PA 19104, USA.

9 <sup>21</sup>Population Aging Research Center, University of Pennsylvania, Philadelphia, PA 19104, USA.

10 <sup>22</sup>Institute for Translational Medicine and Therapeutics, University of Pennsylvania, Philadelphia,  
11 PA 19104, USA.

12

13 *\*Corresponding authors:*

14 Xiaochen Yang ([yang1641@purdue.edu](mailto:yang1641@purdue.edu)), Hongtu Zhu ([htzhu@email.unc.edu](mailto:htzhu@email.unc.edu)), and  
15 Bingxin Zhao ([bxzhao@upenn.edu](mailto:bxzhao@upenn.edu))

16

17 *#Lead contact:*

18 Bingxin Zhao

19 413 Academic Research Building

20 265 South 37th Street, Philadelphia, PA 19104.

21 E-mail: [bxzhao@upenn.edu](mailto:bxzhao@upenn.edu) Phone: (215) 898-8222

1 **Abstract**

2 The UK Biobank (UKB) imaging project is a crucial resource for biomedical research, but is  
3 limited to 100,000 participants due to cost and accessibility barriers. Here we used genetic  
4 data to predict heritable imaging-derived phenotypes (IDPs) for a larger cohort. We  
5 developed and evaluated 4,375 IDP genetic scores (IGS) derived from UKB brain and body  
6 images. When applied to UKB participants who were not imaged, IGS revealed links to  
7 numerous phenotypes and stratified participants at increased risk for both brain and  
8 somatic diseases. For example, IGS identified individuals at higher risk for Alzheimer's  
9 disease and multiple sclerosis, offering additional insights beyond traditional polygenic  
10 risk scores of these diseases. When applied to independent external cohorts, IGS also  
11 stratified those at high disease risk in the All of Us Research Program and the Alzheimer's  
12 Disease Neuroimaging Initiative study. Our results demonstrate that, while the UKB  
13 imaging cohort is largely healthy and may not be the most enriched for disease risk  
14 management, it holds immense potential for stratifying the risk of various brain and body  
15 diseases in broader external genetic cohorts.

16

17 **Keywords:** Abdominal MRI; Brain MRI; Cardiovascular magnetic resonance; Disease risk  
18 assessment; OCT imaging; Genetic prediction; Alzheimer's disease

1 The large-scale imaging data from the UK Biobank (UKB) imaging study has proven to be  
2 an immensely valuable resource for characterizing the structural and functional  
3 organizations of the human brain and body<sup>1-4</sup>. These data have been used to establish  
4 links with clinical biomarkers<sup>5,6</sup>, predict biological aging<sup>7-9</sup>, study socioeconomic  
5 outcomes<sup>10,11</sup>, and facilitate early disease detection<sup>12</sup>. Launched in 2014, the UKB imaging  
6 project reached a milestone in 2022 by completing the multimodal brain magnetic  
7 resonance imaging (MRI) of its 60,000th participant. Although it is already the world's  
8 largest imaging study, the UKB imaging study will ultimately include nearly 100,000  
9 participants<sup>4</sup>, or about 20% of all UKB participants. Given the cost and difficulty of  
10 collecting additional imaging data, it is crucial to develop strategies that extend the utility  
11 of the existing UKB imaging data.

12

13 Polygenic indices<sup>13</sup> (also known as genetic scores, polygenic scores, or polygenic risk  
14 scores [PRS]) can be used to predict traits or disease genetic risk by aggregating genetic  
15 information across the genome<sup>14-21</sup>. The development of numerous prediction methods<sup>22</sup>,  
16 reporting standards<sup>23</sup>, genetic data resources<sup>24</sup>, and data sharing platforms<sup>25</sup> has enabled  
17 the application of these indices to a wide variety of complex diseases and traits. Both  
18 family and population-based studies have shown that variations in brain and body, as  
19 measured by structural and functional MRI, are heritable<sup>2,26-32</sup>. Recent genome-wide  
20 association studies (GWAS)<sup>2,29,33-41</sup> have identified many genetic loci associated with brain  
21 and body imaging-derived phenotypes (IDPs). Given the cost and complexity of imaging  
22 phenotypes, it is natural to ask whether genetic data can be used to predict IDPs for UKB  
23 participants who are not imaged or who are part of other cohorts of interest (e.g., another  
24 biobank-scale cohort, or a cohort dedicated to Alzheimer's disease). Several GWAS have  
25 reported the prediction accuracy (out-of-sample  $R^2$ ) of genetically predicted brain  
26 IDPs<sup>33,42,43</sup> in small-scale independent testing data, indicating that genetic predictors  
27 could partially recover imaging variations. These pilot studies demonstrate that IDP  
28 genetic scores (IGS) can serve as valuable proxy biomarkers of the brain and body in the  
29 absence of readily available imaging data<sup>29,40,44</sup>. In particular, since IGS are genetic  
30 predictions of imaging traits, we expect to see links between IGS and various phenotypes  
31 when there are shared genetic effects.

32

1 Here, we systematically developed and evaluated IGS for UKB brain and body images. We  
2 examined 4,206 brain IDPs from various imaging modalities and independent processing  
3 pipelines, including 3,905 traits generated by the UKB brain imaging team<sup>1,2,34</sup> (referred  
4 to as UKB-Oxford data hereafter) and 301 traits processed by the Brain Imaging Genetics  
5 Knowledge Portal (BIG-KP)<sup>33,35,37</sup>. These imaging biomarkers spanned major brain MRI  
6 categories, including structural MRI (sMRI) such as regional brain volumes<sup>45</sup>, cortical  
7 thicknesses, and surface areas<sup>1</sup>; diffusion MRI (dMRI) such as diffusion tensor imaging  
8 (DTI) parameters<sup>46,47</sup>; resting-state functional MRI (rfMRI) such as independent  
9 component analysis (ICA)<sup>1,2,48,49</sup> or parcellation-based<sup>50</sup> functional connectivity and  
10 activity/amplitude<sup>51</sup> traits; task-based functional MRI (tfMRI) such as activation z-  
11 statistics<sup>1</sup>; and susceptibility weighted brain MRI, incorporating regional median T2\*<sup>5</sup>.  
12 Moreover, we analyzed 169 body IDPs, including 82 from cardiovascular magnetic  
13 resonance (CMR)<sup>3,29</sup>, 41 from abdominal MRI<sup>52-54</sup> (covering organs such as liver, kidney,  
14 and lung), and 46 from optical coherence tomography (OCT) imaging<sup>40</sup>. The **Methods**  
15 section provides more detailed information of these 4,375 IDPs (4,206 brain + 169 body)  
16 (**Table S1**). **Figure 1A** presents an overview of the study design.

17

## 18 **RESULTS**

### 19 **Genetic scores for 4,206 brain IDPs and 169 body IDPs**

20 To develop the genetic scores for IDPs, we used data from UKB individuals of British  
21 ancestry with both imaging and genotyping array for training (average  $n = 34,293$  for MRI  
22 and 54,761 for OCT). An independent hold-out dataset containing participants of non-  
23 British European ancestry served as a testing dataset to evaluate the predictive  
24 performance of the IGS (average  $n = 5,116$  for MRI and 4,801 for OCT). We generated  
25 GWAS summary statistics for each IDP, which were then used as input to derive IGS for  
26 all UKB participants without imaging data. We used PRS-CS<sup>55</sup> to construct the IGS with  
27 genotyping data, and 461,488 genetic variants were included in the prediction model  
28 after standard genetic data quality controls (**Methods**).

29

30 We found that 68.14% (2,866/4,206) of brain IDPs and 95.27% (161/169) of body IDPs  
31 were significantly predicted in the UKB European testing dataset (Benjamini-Hochberg  
32 false discovery rate [FDR] < 5%; **Table S2**). Among the IDPs showing significant prediction,

1 the average  $R^2$  was 1.40% (range = [0.10%, 7.62%]) for brain MRI, 0.85% (range = [0.06%,  
2 6.32%]) for heart CMR, 1.80% (range = [0.26%, 5.67%]) for abdominal MRI, and 4.99%  
3 (range = [1.10%, 10.01%]) for eye OCT. In the brain, we observed genetically predictable  
4 IDPs in both UKB-Oxford and BIG-KP across all brain MRI modalities, and IDPs from the  
5 same imaging modality exhibited similar predictive accuracy ranges in the two separate  
6 processing pipelines (**Fig. S1A**).

7

8 Among BIG-KP sMRI regional brain volumes, the highest prediction accuracy was  
9 observed for brain stem volume ( $R^2 = 7.01\%$ ). Similarly, the UKB-Oxford sMRI IDP with the  
10 highest prediction accuracy ( $R^2 = 7.62\%$ ) was the volume of pons by subcortical volumetric  
11 sub-segmentation of the brain stem. Among BIG-KP dMRI DTI parameters, the highest  
12 prediction accuracy was the mean fractional anisotropy (FA) of the posterior limb of  
13 internal capsule ( $R^2 = 4.72\%$ ). For rfMRI IDPs, the highest prediction accuracy was  
14 observed on one ICA-based global functional connectivity trait that captured the central  
15 executive, salience, and default mode networks ( $R^2 = 5.04\%$ ). In addition, the IDP with the  
16 highest prediction accuracy was the ascending aorta minimum area for heart CMR ( $R^2 =$   
17 6.32%) and the liver iron corrected T1 for abdominal MRI ( $R^2 = 7.38\%$ ). For eye OCT, the  
18 thickness from the inner nuclear layer (INL) to the retinal pigment epithelium of the right  
19 eye had the highest prediction accuracy ( $R^2 = 10.01\%$ ).

20

21 UKB has smaller numbers of non-European participants with imaging data. In an  
22 exploratory analysis, we found that many developed IGS exhibited predictive utility for  
23 individuals of Asian and African ancestries (average  $n = 460$  and  $252$ , respectively),  
24 although the prediction accuracy was generally smaller in these cohorts (**Figs. 1B-1D, S1B-**  
25 **S1D**, and **Tables S3-S4**). To ensure the robustness of our prediction models, we also  
26 conducted the same analyses on all 4,375 IDPs using DBSLMM<sup>56</sup> and evaluated the  
27 consistency of prediction performance (**Figs. S2A-S2B**). Moreover, we performed  
28 prediction using imputed genetic data, which required far greater computational  
29 resources. We observed similar patterns with improved prediction accuracy (**Figs. S2C-**  
30 **S2D**). In summary, our results provide converging evidence that multi-organ IGS can be  
31 reliably developed using different prediction methods and genetic data types, and these  
32 IGS can be potentially applied to diverse populations.

1

## 2 **IGS can stratify participants with a higher risk of brain and body diseases**

3 Stratifying participants into different disease risk groups and identifying high-risk  
4 individuals is crucial in clinical research and has potential for clinical translation<sup>57-59</sup>.  
5 Various factors and biomarkers have been examined for risk stratification, such as disease  
6 polygenic risk scores (dPRS)<sup>60-63</sup>, lifestyle factors<sup>64,65</sup>, and imaging traits<sup>66,67</sup>. Here we  
7 evaluated the performance of IGS in disease risk stratification for 871 phecode-based<sup>68,69</sup>  
8 diseases (**Table S5**). Considering the comparable prediction accuracy and association  
9 results (**Supplementary Note, Figs. S3-S7, and Tables S6-S9**) between BIG-KP and UKB-  
10 Oxford brain IGS, we focused on a selected set of 383 multi-modality brain IGS together  
11 with 41 abdominal IGS, 82 heart IGS, and 46 eye IGS in the following stratification analysis.  
12 For both brain and body IGS, we randomly divided 318,781 unrelated UKB discovery (non-  
13 imaging) participants into three groups (after removing the effects of covariates): the  
14 lowest 10%, the highest 10%, and the middle 80%. We then compared the difference in  
15 disease case rate of these three IGS-stratified groups using a chi-squared test<sup>70</sup> (**Methods**).

16

17 We conducted a stratification analysis of 69 brain disorders using 383 brain IGS, which  
18 consisted of 101 sMRI IGS (BIG-KP regional brain volumes<sup>33</sup>), 110 dMRI IGS (BIG-KP DTI  
19 parameters<sup>35</sup>), and 172 rfMRI IGS (82 ICA-based<sup>2</sup> and 90 parcellation-based<sup>37</sup> traits). After  
20 controlling FDR at 5% ( $69 \times 383$  tests), on UKB discovery cohort, we found that 141 brain  
21 IGS stratified 25 disorders into groups with significantly different disease case rates,  
22 resulting in a total of 294 IGS-disease pairs, and 247 of them were replicated on the UKB  
23 replication cohort ( $P$  range =  $[5.31 \times 10^{-45}, 5.49 \times 10^{-4}]$ ) (**Figs. 2A-2C and S8, and Table S10,**  
24 **Methods**). Among them, we found that rfMRI IGS accounted for almost two-thirds of the  
25 identified stratifications with brain disorders (167/247, 67.61%). The majority (150/167,  
26 89.82%) of the rfMRI IGS-brain disorder stratifications involved delirium, dementia, and  
27 Alzheimer's disease (IGS tail case ratio range =  $[1.16, 2.46]$ ,  $P$  range =  $[5.31 \times 10^{-45}, 5.43 \times$   
28  $10^{-4}]$ ) (**Supplementary Note**), and the rest mainly related to multiple sclerosis and  
29 cerebrovascular diseases (IGS tail case ratio range =  $[1.06, 1.92]$ ,  $P$  range =  $[2.34 \times 10^{-7},$   
30  $5.06 \times 10^{-4}]$ ). Besides, both the ICA-based and parcellation-based rfMRI IGS displayed a  
31 consistent pattern in stratifying delirium, dementia, and Alzheimer's disease, with the  
32 ICA-based traits exhibiting higher power. For example, 14 parcellation-based rfMRI IGS

1 had 38 stratification pairs with delirium, dementia, and Alzheimer’s disease, while 39 ICA-  
2 based rfMRI IGS had 119 such pairs, representing 67.86% (38/56) and 90.84% (119/131)  
3 of all parcellation-based rfMRI and ICA-based stratification results, respectively (**Table**  
4 **S10**).

5  
6 The IGS derived from dMRI and sMRI also stratified multiple brain disorders. Out of the  
7 110 dMRI IGS, 33 significantly stratified 14 disorders (IGS tail case ratio range = [1.04,  
8 2.10],  $P$  range = [ $1.65 \times 10^{-8}$ ,  $5.12 \times 10^{-4}$ ]), corresponding to 54 IGS-disease pairs, including  
9 multiple sclerosis, dementia, Alzheimer’s disease, and cerebrovascular diseases such as  
10 intracranial hemorrhage, cerebral ischemia, and occlusion of cerebral arteries (**Fig. 2B**).  
11 Among the 101 sMRI IGS, 14 significantly stratified 9 disorders (IGS tail case ratio range =  
12 [1.09, 1.98],  $P$  range = [ $3.50 \times 10^{-11}$ ,  $5.49 \times 10^{-4}$ ]), with a total of 26 IGS-disease pairs (**Fig.**  
13 **2C**). We found that both dMRI and sMRI IGS showed strong stratifications with multiple  
14 sclerosis, a heritable common neurodegenerative disease and a leading cause of  
15 nontraumatic disability among young adults<sup>71-73</sup>. For example, the IGS of the cingulum  
16 axial diffusivity was found to have significantly more MS patients in its lower 10% tail than  
17 its upper 10% tail (IGS tail case ratio = 1.76,  $P = 3.45 \times 10^{-8}$ ), consistent with results of  
18 previous association analysis using dMRI data<sup>74</sup>. Participants with the smallest 10% IGS of  
19 the left and right thalamus proper volumes contained 1.73 and 1.96-fold ( $P < 5.37 \times 10^{-5}$ )  
20 more MS cases than those with the largest 10% IGS, respectively. Similarly, IGS of the left  
21 and right putamen and the accumbens area volumes all stratified MS patients such that  
22 the lower 10% IGS tail had a significantly higher case number than the upper 10% IGS tail  
23 (IGS tail case ratio range = [1.55, 1.85],  $P$  range = [ $2.09 \times 10^{-10}$ ,  $4.11 \times 10^{-4}$ ]). These findings  
24 are in line with previous studies identifying decreased brain volume in the thalamus<sup>75,76</sup>,  
25 putamen<sup>77</sup>, and accumbens<sup>78</sup> in multiple sclerosis patients, highlighting the potential of  
26 these brain IGS in identifying individuals at high risk for multiple sclerosis without actual  
27 imaging data.

28  
29 Body IGS also stratified diseases in their corresponding organs and systems. Using the 41  
30 abdominal IGS, we stratified 104 digestive system diseases and 100 genitourinary system  
31 diseases (204  $\times$  41 tests) and identified 280 significant IGS-disease pairs after controlling  
32 FDR at 5% level, where 229 of them were replicated on the UKB replication cohort,



1 associated with 37 abdominal IGS and 51 diseases ( $P$  range =  $[4.80 \times 10^{-250}, 1.66 \times 10^{-3}]$ )  
2 (**Fig. S9A**). For example, we found that chronic renal failure patients were significantly  
3 stratified by the IGS of kidney volume and kidney parenchyma volume (IGS tail case ratio  
4 range =  $[1.25, 1.37]$ ,  $P$  range =  $[2.05 \times 10^{-18}, 6.42 \times 10^{-10}]$ ). The lower 10% IGS tail contained  
5 more patients, and indeed the kidney volume and kidney parenchyma volume have been  
6 found associated with kidney function (such as positive correlation with as glomerular  
7 filtration rate and negative correlation with creatinine)<sup>79,80</sup>. In addition, patients with  
8 chronic liver disease and cirrhosis were significantly stratified by the IGS of several  
9 abdominal MRI traits, including liver proton density fat fraction and total abdominal fat  
10 (IGS tail case ratio range =  $[1.22, 1.99]$ ,  $P$  range =  $[4.88 \times 10^{-40}, 1.55 \times 10^{-3}]$ ), consistent  
11 with previous studies on the association between liver disease risk and liver/abdominal  
12 fat<sup>81-83</sup>. Furthermore, we examined the stratification of 90 circulatory system diseases  
13 using 82 heart IGS (90  $\times$  82 tests), discovered 202 IGS-disease pairs after controlling FDR  
14 at 5% level, and replicated 180 pairs between 54 heart IGS and 40 diseases ( $P$  range =  
15  $[2.40 \times 10^{-34}, 1.37 \times 10^{-3}]$ ) (**Fig. 2D**). The strongest stratifications were found between  
16 aortic aneurysms and the IGS of ascending/descending aorta maximum area, and  
17 ascending/descending aorta minimum area (IGS tail case ratio range =  $[1.32, 1.75]$ ,  $P$   
18 range =  $[5.71 \times 10^{-14}, 6.75 \times 10^{-4}]$ ), which is the area of the region where aortic aneurysm  
19 occurs<sup>84</sup>. We found that aortic aneurysm was monotonely stratified across all values of  
20 the IGS of the ascending aorta maximum area such that larger IGS corresponded to higher  
21 risk (**Figs. 2E-2F**). MRI-measured aortic dimensions are frequently used for diagnosis of  
22 aortic aneurysms<sup>85</sup>, and large aortic diameters are considered abnormal and even  
23 diagnostic of aortic aneurysms<sup>86</sup>. Similarly, we stratified 38 eye and adnexa-related  
24 disorders using 46 eye IGS (38  $\times$  46 tests) and replicated 67 of the 107 IGS-disease pairs  
25 with significant stratifications, corresponding to 27 eye IGS and 13 eye disorders ( $P$  range  
26 =  $[5.65 \times 10^{-49}, 2.25 \times 10^{-3}]$ ) (**Fig. S9B**). For example, we found significantly more glaucoma  
27 cases presented in the 10% upper tail of the IGS of the raw vertical cup-to-disc ratio (VCDR)  
28 of the left eye and the VCDR regressed on disc diameter<sup>87</sup> (IGS tail case ratio range =  $[1.51,$   
29  $1.98]$ ,  $P$  range =  $[3.41 \times 10^{-22}, 3.77 \times 10^{-9}]$ ). The large value of observed VCDR has been  
30 used clinically as a robust indicator for glaucoma<sup>88</sup>.

31

1 We also evaluated the performance of IGS in cross-organ applications. First, we stratified  
2 69 brain disorders by the 41 abdominal IGS, 82 heart IGS, and 46 eye IGS. We identified  
3 and replicated 19 pairs between 19 IGS (6 heart IGS and 13 abdominal IGS) and 9 brain  
4 disorders ( $P$  range =  $[4.16 \times 10^{-13}, 9.97 \times 10^{-5}]$ ) (**Fig. S9C** and **Table S11**). For example, the  
5 IGS of the right ventricular ejection fraction had 1.62-fold more multiple sclerosis patients  
6 in its lower 10% tail than its upper 10% tail ( $P = 7.03 \times 10^{-6}$ ). This result matched previous  
7 findings that multiple sclerosis patients had decreased ventricular ejection fractions<sup>89,90</sup>.  
8 Second, we stratified 90 circulatory system diseases by the 383 brain IGS, 41 abdominal  
9 IGS, and 46 eye IGS. After controlling FDR at 5% level and replicating on UKB replication  
10 cohort, we found that 27 circulatory system diseases were significantly stratified by 13  
11 abdominal IGS, 79 brain IGS, and 3 eye IGS ( $P$  range =  $[1.04 \times 10^{-10}, 2.78 \times 10^{-4}]$ ) (**Fig. S9D**).  
12 Among these, peripheral vascular disease was widely stratified by all modalities of brain  
13 IGS (IGS tail case ratio range =  $[1.10, 1.36]$ ,  $P$  range =  $[2.25 \times 10^{-8}, 2.71 \times 10^{-4}]$ ), with the  
14 majority of signals in dMRI IGS (56.36%, 31/55). For example, the FA IGS of the body of  
15 corpus callosum and anterior corona radiata both had more cases in their upper 10% tail,  
16 and the mean diffusivity IGS of these two had fewer cases in their upper 10% tail,  
17 consistent with prior findings on the associations between dMRI traits and peripheral  
18 vascular diseases<sup>91</sup>. Additionally, the IGS of the thickness of the inner nuclear of both eyes  
19 significantly stratified hypertension patients, consistent with the reported associations  
20 between higher blood pressure and thicker INL<sup>92</sup>, as well as our association results  
21 between eye IGS and quantitative measures of blood pressure (**Supplementary Note**).

22

### 23 **IGS broadly contribute to disease stratification in addition to disease genetic risk**

24 Following disease stratification by IGS, we measured the predictive power of IGS for  
25 disease by area under the curve (AUC), as AUC was widely used to measure power of  
26 PRS<sup>93,94</sup> and allowed us to better measure the clinical utility of IGS. For each IGS-disease  
27 pair that showed significant stratification (**Figs. 2A-2D** and **S9**, and **Tables S10-S11**), we  
28 evaluated the AUC gain by including the IGS for disease prediction, compared to a  
29 baseline model. Since dPRS is a frequently used genetic risk measure, we also analyzed  
30 the AUC gain from the additional inclusion of IGS when FinnGen<sup>95</sup>-derived dPRS was  
31 already incorporated (**Methods**).

32

1 As previously shown, brain and body IGS demonstrated marginal stratification capability  
2 for diseases in both same-organ and cross-organ applications (**Figs. 2A-2D** and **S10**). To  
3 measure the AUC gain from IGS, for each of the 110 diseases significantly stratified by IGS  
4 and for each IGS that significantly stratified the disease, we constructed two logistic  
5 regression models to measure the AUC gain: a baseline model that predicts disease status  
6 using basic covariates only, and an IGS model that additionally uses an IGS. The increment  
7 in the AUC of the IGS model relative to the baseline model is defined as the AUC gain of  
8 IGS. Out of the 919 pairs IGS-disease pairs showing replicated stratification patterns, 916  
9 pairs had positive AUC gain for disease prediction from the IGS. Comparing the baseline  
10 model to the IGS model using DeLong test<sup>96</sup>, after controlling for FDR at level 5%, 80.52%  
11 (740/919) pairs had significant AUC gain with the median being 0.0208 (range = [ $7.25 \times$   
12  $10^{-5}$ ,  $2.11 \times 10^{-1}$ ], **Figs. 3A-3C** and **S10**, and **Tables S12-S13**). For example, in **Figure 3A**, the  
13 largest AUC gain from brain IGS for brain disorder prediction was achieved by  
14 Net25\_Node9 IGS for Alzheimer's disease (AUC gain = 0.0858,  $P = 8.04 \times 10^{-23}$ ), whose  
15 disease stratification patterns were visualized in **Figure S8**. All dMRI IGS that stratified  
16 Alzheimer's disease in **Figure 2B** also had significant AUC gain (**Fig. 3B**). The IGS of the  
17 ascending aorta maximum area predicted aortic aneurysm with AUC gain 0.0462 ( $P = 5.93$   
18  $\times 10^{-9}$ ), the largest among heart IGS that significantly stratified circulatory system diseases  
19 (**Fig. 3C**). Overall, the AUC gains of IGS suggest that the majority of disease-stratifying IGS  
20 not only stratify subsets of subjects at high risk but also contribute to disease prediction  
21 at the cohort level.

22  
23 We further assessed the contribution of IGS to disease prediction and stratification  
24 beyond that provided by dPRS. Briefly, we constructed dPRS using FinnGen GWAS  
25 summary statistics of phecode-based diseases. We manually mapped 105 of the 110 UKB  
26 diseases that had IGS stratification signals to 78 FinnGen disease endpoints (case number  
27 range = [216, 111,581], median = 7,576) following the FinnGen-phecode mapping in Sun  
28 et al<sup>97</sup> and disease description in FinnGen R9<sup>95</sup> (**Table S14**). After Bonferroni correction at  
29 5% level, 98 out of the 105 diseases gained significantly in AUC from inclusion of IGS on  
30 top of dPRS (AUC gain range = [ $5.85 \times 10^{-5}$ ,  $3.16 \times 10^{-2}$ ], AUC gain median =  $4.26 \times 10^{-3}$ ,  $P$   
31 range = [ $7.24 \times 10^{-35}$ ,  $2.27 \times 10^{-3}$ ]) (**Fig. 3D** and **Table S15**). The largest AUC gain (0.0316)  
32 was achieved for nephrotic syndrome (without mention of glomerulonephritis, phecode

1 580.20), a kidney disorder associated with excessive protein in the urine. Examining the  
2 AUC from dPRS alone and the additional AUC gain from IGS in **Figure 3D**, diseases can be  
3 categorized into three types: (1) those with uninformative dPRS and large relative AUC  
4 gains from IGS, (2) those with moderate dPRS and moderate AUC gains from IGS, and (3)  
5 those with informative dPRS and minimal AUC gains from IGS. This suggests that IGS can  
6 help disease stratification, even if it does not always substantially boost the AUC. It makes  
7 sense because AUC primarily reflects overall predictive performance across the entire  
8 cohort and might not capture variations within specific subgroups (e.g., subjects with  
9 high/low risk). Multiple diseases from each category were discussed in **Supplementary**  
10 **Note**, and below we highlight a few examples spanning all categories.

11  
12 For diseases with "uninformative dPRS," where subjects may have similar disease risks  
13 across all dPRS percentile groups, IGS can still effectively stratify these subjects into high  
14 and low risk within each dPRS group (**Fig. 3E**). Typically, these diseases lack large GWAS  
15 data resources, and incorporating IGS could substantially improve the AUC. For example,  
16 the dPRS of nephrotic syndrome had an AUC gain of 0.0083 and was generated using  
17 FinnGen GWAS (FinnGen ID: N14\_NEPHROTICSYND), which had a limited sample size of  
18 853 patients but was already large among the existing GWAS of this disease<sup>98,99</sup>. Cerebral  
19 degeneration (phecode 331.90) had a dPRS AUC gain of 0.0084 (G6\_DEGENOTH) and  
20 gained additional AUC of 0.0188 by including three brain IGS. As the predictive  
21 performance of dPRS improved, resulting in "moderate dPRS," the stratification ability of  
22 the IGS-dPRS model remained consistent on top of dPRS across almost all dPRS groups  
23 (**Figs. 3F-3G**). IGS AUC gain remained nontrivial for some diseases, such as delirium  
24 (phecode 290.20, AUC gain 0.0122) and aortic aneurysm (phecode 442.10, AUC gain  
25 0.0101). Furthermore, Alzheimer's disease and multiple sclerosis had "informative dPRS"  
26 such that the dPRS AUC gain was 0.1707 and 0.1503, respectively, and thus the further  
27 AUC gain from IGS was significant yet small, both being 0.0022. Nevertheless, individuals  
28 with high Alzheimer's disease dPRS, especially the top 10% individuals with highest dPRS,  
29 were stratified into subgroups of distinct disease risk by IGS (**Fig. 3H**). Similar stratification  
30 trends from the IGS-dPRS model were observed across multiple sclerosis and various  
31 other diseases (**Fig. S11**).

32

1 In summary, we conducted a comprehensive AUC analysis of IGS prediction of diseases.  
2 Most disease-stratifying IGS showed significant AUC contribution, and various diseases,  
3 such as nephrotic syndrome, cerebral degeneration, delirium, and aortic aneurysms, had  
4 nontrivial AUC gain from IGS in addition to dPRS. Besides, even for diseases with  
5 informative dPRS and seemingly minimal AUC gain from IGS, IGS still stratified individuals  
6 with high disease genetic risk into subgroups with distinct risk. We will conduct detailed  
7 analyses of IGS stratification for Alzheimer's disease and multiple sclerosis in the next  
8 section to provide more insights into the IGS contribution to disease stratification in  
9 scenarios with minimal AUC gains. It is important to note that these cases may represent  
10 the lower bound of IGS utility, as their contribution would likely be greater if the AUC  
11 gains were more substantial.

12

### 13 **IGS stratification of Alzheimer's disease and multiple sclerosis: in-depth analysis and** 14 **generalizability**

15 As presented earlier, Alzheimer's disease and multiple sclerosis are the two  
16 neurodegenerative disorders that were most frequently stratified by brain IGS on UKB  
17 discovery cohort, with 55 and 27 stratifying brain IGS, respectively. In this section, we  
18 provide an in-depth analysis of the stratification patterns of these two diseases using all  
19 stratifying brain IGS. Furthermore, we constructed IGS for participants from two  
20 independent cohorts: the All of Us research program (AOU,  $n = 245,394$ )<sup>100</sup> and  
21 Alzheimer's Disease Neuroimaging Initiative study (ADNI,  $n = 1,152$ )<sup>101</sup> (**Methods**). We  
22 showed that the Alzheimer's disease stratification patterns observed on UKB can be  
23 replicated on AOU and ADNI. Moreover, we considered *APOE* status, and found that IGS  
24 can effectively stratify Alzheimer's disease among participants of same *APOE* haplotypes.  
25 *APOE* is known to be the strongest genetic factor risk for Alzheimer's disease and its  
26 homozygote is considered a form of Alzheimer's disease<sup>102</sup>. Similar to Alzheimer's disease,  
27 multiple sclerosis stratification patterns on UKB were replicated on AOU as well.

28

29 We have observed the marginal stratification of Alzheimer's disease on UKB participants  
30 by many brain IGS (**Figs. 2A-2B**). To stratify Alzheimer's disease using all the stratifying  
31 IGS, we constructed an IGS burden score by counting the number of IGS high-risk tails a  
32 subject was in, across the 55 IGS that were marginally stratifying (**Methods**). As expected,

1 Alzheimer's disease risk rose as IGS burden score increased (**Fig. S12**). Two additional risk  
2 factors, age and dPRS, were then evaluated. Ageing is known to be closely related to  
3 Alzheimer's disease progression<sup>103,104</sup>. Upon grouping participants by age, participants of  
4 similar age were further stratified into "lower IGS burden score" or "higher IGS burden  
5 score" groups if their IGS burden scores fell within the lower or upper 20% extremes for  
6 their respective stratum. We found a consistent rise in the percentage of disease cases  
7 with increasing age. Within each age group, particularly beginning from around age 60 on  
8 the UKB cohorts and from around age 65 on the AOU and ADNI cohorts, participants with  
9 higher IGS burden score always had much higher disease percentage than those with  
10 lower IGS burden score (**Figs. 4A-4D** and **Table S16**).

11  
12 For Alzheimer's disease dPRS, we first verified that the FinnGen-derived dPRS effectively  
13 stratified patients in UKB, AOU, and ADNI cohorts (**Fig. S13**). We found that the IGS burden  
14 score further stratified participants from the same dPRS percentile group. For example,  
15 in **Figure 4E**, among the 31,797 participants with the top 10% dPRS, 2.38% had developed  
16 Alzheimer's disease. The subgroup with higher IGS burden scores had an disease  
17 percentage of 3.09% and the one with lower IGS burden scores had a disease percentage  
18 of 1.85%. That is, inside this dPRS group, the higher IGS burden score subgroup contained  
19 1.67-fold of cases, compared with the lower IGS burden score subgroup ( $P = 2.58 \times 10^{-6}$ ).  
20 Similar patterns were observed in UKB replication and AOU cohorts (**Figs. 4F-4G**). In ADNI,  
21 we also found that within each dPRS percentile group, the subgroup of higher IGS burden  
22 score always had a higher dementia percentage than the lower IGS burden score  
23 subgroup (**Fig. 4H**). These results demonstrated the contribution of IGS stratification on  
24 top of dPRS and the generalizability of UKB-derived IGS on external genetic cohorts.

25  
26 We then examined *APOE* and found the IGS stratification power was not dominated by  
27 *APOE* status. In the UKB discovery cohort, we focused on subjects of age at least 55, and  
28 belong to one of the four common *APOE* haplotypes ( $n = 202,304$ ):  $\epsilon 2$  carriers,  $\epsilon 3$   
29 homozygotes,  $\epsilon 4$  heterozygotes, and  $\epsilon 4$  homozygotes (**Methods**).  $\epsilon 3$  homozygotes were  
30 the most common *APOE* haplotype,  $\epsilon 2$  carriers had lower disease risk,  $\epsilon 4$  heterozygotes  
31 had higher risk, and  $\epsilon 4$  homozygotes were recently considered a genetic form of  
32 Alzheimer's disease<sup>102</sup>.  $\epsilon 4$  heterozygotes and  $\epsilon 4$  homozygotes were also combined into

1  $\epsilon 4$  carriers. In **Figure 5A**, we found that IGS burden score stratified disease risk among  
2 participants of same *APOE* haplotypes, and IGS stratification power remained when both  
3 disease dPRS and *APOE* status were considered (**Figs. 5B-5F**). These results demonstrated  
4 that IGS stratification of Alzheimer's disease was not simply driven by *APOE*, suggesting  
5 that IGS could be useful for risk stratification when combined with other genetic risk  
6 factors.

7  
8 Brain IGS and burden scores also stratified multiple sclerosis on both UKB and AOU  
9 cohorts. For example, the IGS of the left putamen volume had 1.85-fold of multiple  
10 sclerosis patients in its lower 10% tail than its upper 10% tail (**Fig. 2C** and **Table S10**).  
11 Decreased putamen volume was observed among multiple sclerosis patients in previous  
12 studies<sup>77</sup>. Further examining participants across all IGS percentile groups, we found that  
13 both UKB discovery participants and AOU European participants had roughly monotone  
14 decreasing disease percentage as the left putamen volume IGS increased, with the  
15 monotone trend more visible among females (**Figs. 6A-6B** and **Table S17**). We then  
16 included dPRS as an additional risk factor to stratify multiple sclerosis. Similar to  
17 Alzheimer's disease dPRS, we first verified that multiple sclerosis dPRS were able to  
18 stratify multiple sclerosis patients in UKB and AOU cohorts (**Fig. S14**). IGS burden score  
19 was then constructed and was able to further stratify participants of similar dPRS into  
20 subgroups of different disease percentage (**Methods**). Among both UKB and AOU  
21 participants, further stratification of multiple sclerosis by IGS burden score on top of dPRS  
22 was observed, and the stratification was weaker on non-European cohorts as expected  
23 (**Figs. 6C-6F**). The multiple sclerosis stratification patterns on UKB and AOU using UKB-  
24 derived IGS provided evidence that stratification patterns by UKB-derived IGS could  
25 generalize well to external cohort, especially when the ancestry of the external cohort is  
26 close the IGS development cohort. We also examined stratification of bipolar disorder in  
27 the AOU study (**Supplementary Note** and **Table S18**), which represents a scenario where  
28 the external cohort has a much larger number of disease cases compared to the UKB study.

29

## 30 **DISCUSSION**

31 In this study, we developed 4,375 brain and body IGS and evaluated their performance in  
32 disease risk stratification for UKB participants without imaging data and external

1 participants from UKB-independent studies. We confirmed that these IGS can provide  
2 biologically relevant information to complex traits and diseases. Brain and body IGS  
3 effectively stratified the risk of various diseases not only within their respective organ  
4 systems but also in other organs, such as the pair of right ventricular ejection fraction and  
5 multiple sclerosis. These results reflect both intra- and inter-organ connections between  
6 IGS and clinical outcomes. We also conducted AUC analysis of IGS and found IGS can  
7 stratify disease risk on top of disease genetic risk score, regardless of the overall AUC gain.  
8 These results highlight differences in AUC measures and stratification capabilities,  
9 suggesting the potential of IGS for clinical utility. We conducted a thorough analysis of  
10 Alzheimer's disease, detailing age-related trends, replication of findings in both UKB and  
11 independent cohorts, and the distinct contributions of IGS beyond dPRS and *APOE*. Our  
12 IGS data resources have been made publicly available, facilitating similar in-depth  
13 analyses for numerous brain and somatic diseases. We also provide a second example of  
14 this application to multiple sclerosis.

15

16 Ageing is well-recognized for its close association with the progression of Alzheimer's  
17 disease. Our findings indicate that IGS burden score consistently stratifies individuals at  
18 higher risk of Alzheimer's disease in those aged over 55 in UKB and over 65 in AOU and  
19 ADNI (**Figs. 4A-4D**). The IGS burden score was derived from multiple brain MRI IDPs, many  
20 of which have been previously associated with Alzheimer's disease in studies with actual  
21 imaging. Given that IGS was constructed solely from genotyping data, it can be readily  
22 applied to participants with genetic data, enabling a quick and efficient assessment of  
23 disease risk in older individuals, without undergoing real imaging data collection. We  
24 further demonstrated that IGS, when combined with dPRS, offered a multi-layered  
25 stratification of disease risk, which had better performance than using only the disease  
26 genetic risk score (**Figs. 4E-4H**). Moreover, IGS contributed to Alzheimer's disease  
27 stratification when both *APOE* status and dPRS were considered (**Figs. 5A-5F**), suggesting  
28 stratification power of IGS was not purely driven by *APOE*. These results indicate that  
29 although the UKB imaging study, with its largely healthy participant base, may not have  
30 direct proven applicability for disease risk management, it possesses the capacity to  
31 stratify disease risk in broader external genetic cohorts. We anticipate that the IGS



1 developed in our study can be widely applied in the stratification and management of  
2 Alzheimer's disease risk.

3

4 When real imaging data are not available, IGS can be used as genetically predicted  
5 variables for brain and body structures and functions. In addition to contribute to disease  
6 stratification and prediction, established IGS provides an objective pseudo-imaging  
7 biomarker associated with a specific organ region, which may serve as informative  
8 measure of diseases such as early-stage Alzheimer's disease<sup>105,106</sup>, early-stage multiple  
9 sclerosis<sup>107,108</sup>, and bipolar disorder<sup>109</sup>. Furthermore, IGS may also contribute to ongoing  
10 efforts on disease subtyping and integration<sup>110,111</sup>. However, as shown in our prediction  
11 analysis, IGS was typically only able to partially reconstruct the imaging phenotypes. It has  
12 generally been observed that IGS has demonstrated imperfect performance in most  
13 complex traits and diseases, which can be attributed to many factors, including a limited  
14 number of training samples, heritability, and weak genetic effects<sup>112-114</sup>. Another  
15 challenge in IGS applications lies in ancestry and population differences<sup>115-117</sup>. As the  
16 current UKB imaging cohort had the majority of the participants of European ancestry,  
17 generating IGS in non-UKB and/or non-European studies may have further reduced  
18 performance<sup>113</sup>. In our UKB replication cohort, comprising non-British and non-European  
19 participants, we observed that the IGS demonstrated consistent performance similar to  
20 that in the discovery cohort (for example, **Figs. 4B, 4F, and 6E**). More powerful IGS  
21 methods that better account for these IGS limitations and cohort differences may result  
22 in more informative IGS for potential clinical applications. In addition, we expect to see  
23 improvement in IGS prediction accuracy and stratification when more imaging samples  
24 and IDPs are released by the UKB and other large imaging genetic studies.

25

## 26 **METHODS**

27 Methods are available in the *Methods* section.

28

## 29 **ACKNOWLEDGEMENTS**

30 Research reported in this publication was supported by the National Institute On Aging of  
31 the National Institutes of Health under Award Number RF1AG082938. The content is  
32 solely the responsibility of the authors and does not necessarily represent the official

1 views of the National Institutes of Health. The study has also been partially supported by  
2 funding from the Wharton Dean’s Research Fund, Analytics at Wharton, and Purdue  
3 Statistics Department. This research has been conducted using the UK Biobank resource  
4 (application number 76139), subject to a data transfer agreement. We would like to thank  
5 the individuals who represented themselves in the UK Biobank for their participation and  
6 the research teams for their efforts in collecting, processing, and disseminating these  
7 datasets. We gratefully acknowledge all the studies and databases that made GWAS  
8 summary-level data publicly available. We would like to thank the research computing  
9 groups at Purdue University, the University of North Carolina at Chapel Hill, and the  
10 Wharton School of the University of Pennsylvania for providing computational resources  
11 and support that have contributed to these research results.

12

### 13 REFERENCES

- 14 1. Alfaro-Almagro, F. *et al.* Image processing and Quality Control for the first 10,000  
15 brain imaging datasets from UK Biobank. *NeuroImage* **166**, 400-424 (2018).
- 16 2. Elliott, L.T. *et al.* Genome-wide association studies of brain imaging phenotypes  
17 in UK Biobank. *Nature* **562**, 210-216 (2018).
- 18 3. Bai, W. *et al.* A population-based phenome-wide association study of cardiac and  
19 aortic structure and function. *Nature Medicine* **26**, 1654-1662 (2020).
- 20 4. Littlejohns, T.J. *et al.* The UK Biobank imaging enhancement of 100,000  
21 participants: rationale, data collection, management and future directions.  
22 *Nature communications* **11**, 1-12 (2020).
- 23 5. Miller, K.L. *et al.* Multimodal population brain imaging in the UK Biobank  
24 prospective epidemiological study. *Nature Neuroscience* **19**, 1523-1536 (2016).
- 25 6. Smith, S.M. & Nichols, T.E. Statistical challenges in “big data” human  
26 neuroimaging. *Neuron* **97**, 263-268 (2018).
- 27 7. Cole, J.H. Multimodality neuroimaging brain-age in UK biobank: relationship to  
28 biomedical, lifestyle, and cognitive factors. *Neurobiology of aging* **92**, 34-42  
29 (2020).
- 30 8. Cox, S.R. *et al.* Ageing and brain white matter structure in 3,513 UK Biobank  
31 participants. *Nature communications* **7**, 13629 (2016).

- 1 9. Peng, H., Gong, W., Beckmann, C.F., Vedaldi, A. & Smith, S.M. Accurate brain age  
2 prediction with lightweight deep neural networks. *Medical image analysis* **68**,  
3 101871 (2021).
- 4 10. Kweon, H. *et al.* Human brain anatomy reflects separable genetic and  
5 environmental components of socioeconomic status. *Science advances* **8**,  
6 eabm2923 (2022).
- 7 11. Spreng, R.N. *et al.* The default network of the human brain is associated with  
8 perceived social isolation. *Nature communications* **11**, 6393 (2020).
- 9 12. Azevedo, T. *et al.* Identifying healthy individuals with Alzheimer neuroimaging  
10 phenotypes in the UK Biobank. *medRxiv* (2022).
- 11 13. Becker, J. *et al.* Resource profile and user guide of the Polygenic Index  
12 Repository. *Nature human behaviour* **5**, 1744-1758 (2021).
- 13 14. Lewis, C.M. & Vassos, E. Polygenic risk scores: from research tools to clinical  
14 instruments. *Genome medicine* **12**, 1-11 (2020).
- 15 15. Torkamani, A., Wineinger, N.E. & Topol, E.J. The personal and clinical utility of  
16 polygenic risk scores. *Nature Reviews Genetics* **19**, 581-590 (2018).
- 17 16. Rietveld, C.A. *et al.* Replicability and robustness of genome-wide-association  
18 studies for behavioral traits. *Psychological science* **25**, 1975-1986 (2014).
- 19 17. Choi, S.W., Mak, T.S.-H. & O'Reilly, P.F. Tutorial: a guide to performing polygenic  
20 risk score analyses. *Nature protocols* **15**, 2759-2772 (2020).
- 21 18. Wray, N.R., Goddard, M.E. & Visscher, P.M. Prediction of individual genetic risk  
22 to disease from genome-wide association studies. *Genome research* **17**, 1520-  
23 1528 (2007).
- 24 19. Consortium, I.S. Common polygenic variation contributes to risk of schizophrenia  
25 and bipolar disorder. *Nature* **460**, 748-752 (2009).
- 26 20. Kullo, I.J. *et al.* Polygenic scores in biomedical research. *Nature Reviews Genetics*  
27 **23**, 524-532 (2022).
- 28 21. Chatterjee, N., Shi, J. & García-Closas, M. Developing and evaluating polygenic  
29 risk prediction models for stratified disease prevention. *Nature Reviews Genetics*  
30 **17**, 392 (2016).
- 31 22. Ma, Y. & Zhou, X. Genetic prediction of complex traits with polygenic scores: a  
32 statistical review. *Trends in Genetics* **37**, 995-1011 (2021).

- 1 23. Wand, H. *et al.* Improving reporting standards for polygenic scores in risk  
2 prediction studies. *Nature* **591**, 211-219 (2021).
- 3 24. Uffelmann, E. *et al.* Genome-wide association studies. *Nature Reviews Methods*  
4 *Primers* **1**, 1-21 (2021).
- 5 25. Lambert, S.A. *et al.* The Polygenic Score Catalog as an open database for  
6 reproducibility and systematic evaluation. *Nature Genetics* **53**, 420-425 (2021).
- 7 26. Zhao, B. *et al.* Heritability of regional brain volumes in large-scale neuroimaging  
8 and genetic studies. *Cerebral Cortex* **29**, 2904-2914 (2018).
- 9 27. Kochunov, P. *et al.* Homogenizing estimates of heritability among SOLAR-Eclipse,  
10 OpenMx, APACE, and FPHI software packages in neuroimaging data. *Frontiers in*  
11 *Neuroinformatics* **13**, 16 (2019).
- 12 28. Thompson, P.M. *et al.* ENIGMA and global neuroscience: A decade of large-scale  
13 studies of the brain in health and disease across more than 40 countries.  
14 *Translational psychiatry* **10**, 1-28 (2020).
- 15 29. Zhao, B. *et al.* Heart-brain connections: Phenotypic and genetic insights from  
16 magnetic resonance images. *Science* **380**, abn6598 (2023).
- 17 30. Colclough, G.L. *et al.* The heritability of multi-modal connectivity in human brain  
18 activity. *Elife* **6**, e20178 (2017).
- 19 31. Busjahn, C.A. *et al.* Heritability of left ventricular and papillary muscle heart size:  
20 a twin study with cardiac magnetic resonance imaging. *European heart journal*  
21 **30**, 1643-1647 (2009).
- 22 32. Chien, K.-L., Hsu, H.-C., Su, T.-C., Chen, M.-F. & Lee, Y.-T. Heritability and major  
23 gene effects on left ventricular mass in the Chinese population: a family study.  
24 *BMC cardiovascular disorders* **6**, 1-9 (2006).
- 25 33. Zhao, B. *et al.* Genome-wide association analysis of 19,629 individuals identifies  
26 variants influencing regional brain volumes and refines their genetic co-  
27 architecture with cognitive and mental health traits. *Nature genetics* **51**, 1637-  
28 1644 (2019).
- 29 34. Smith, S.M. *et al.* An expanded set of genome-wide association studies of brain  
30 imaging phenotypes in UK Biobank. *Nature neuroscience* **24**, 737-745 (2021).
- 31 35. Zhao, B. *et al.* Common genetic variation influencing human white matter  
32 microstructure. *Science* **372**, eabf3736 (2021).

- 1 36. Grasby, K.L. *et al.* The genetic architecture of the human cerebral cortex. *Science*  
2 **367**, eaay6690 (2020).
- 3 37. Zhao, B. *et al.* Genetic influences on the intrinsic and extrinsic functional  
4 organizations of the cerebral cortex. *medRxiv*, 2021.07. 27.21261187 (2021).
- 5 38. Hofer, E. *et al.* Genetic correlations and genome-wide associations of cortical  
6 structure in general population samples of 22,824 adults. *Nature*  
7 *communications* **11**, 1-16 (2020).
- 8 39. Satizabal, C.L. *et al.* Genetic architecture of subcortical brain structures in 38,851  
9 individuals. *Nature genetics* **51**, 1624-1636 (2019).
- 10 40. Zhao, B. *et al.* Eye-brain connections revealed by multimodal retinal and brain  
11 imaging genetics in the UK Biobank. *medRxiv*, 2023.02. 16.23286035 (2023).
- 12 41. Zhao, B. *et al.* Common variants contribute to intrinsic human brain functional  
13 networks. *Nature Genetics* **54**, 508-517 (2022).
- 14 42. Zhao, B. *et al.* Large-scale GWAS reveals genetic architecture of brain white  
15 matter microstructure and genetic overlap with cognitive and mental health  
16 traits (n = 17,706). *Molecular Psychiatry* (2019).
- 17 43. Zhao, B. *et al.* Common variants contribute to intrinsic human brain functional  
18 networks. *Nat Genet* **54**, 508-517 (2022).
- 19 44. Cordova-Palomera, A. *et al.* Cardiac Imaging of Aortic Valve Area From 34 287 UK  
20 Biobank Participants Reveals Novel Genetic Associations and Shared Genetic  
21 Comorbidity With Multiple Disease Phenotypes. *Circ Genom Precis Med* **13**,  
22 e003014 (2020).
- 23 45. Avants, B.B. *et al.* A reproducible evaluation of ANTs similarity metric  
24 performance in brain image registration. *Neuroimage* **54**, 2033-2044 (2011).
- 25 46. Jahanshad, N. *et al.* Multi-site genetic analysis of diffusion images and voxelwise  
26 heritability analysis: A pilot project of the ENIGMA–DTI working group.  
27 *Neuroimage* **81**, 455-469 (2013).
- 28 47. Kochunov, P. *et al.* Multi-site study of additive genetic effects on fractional  
29 anisotropy of cerebral white matter: comparing meta and megaanalytical  
30 approaches for data pooling. *Neuroimage* **95**, 136-150 (2014).

- 1 48. Beckmann, C.F. & Smith, S.M. Probabilistic independent component analysis for  
2 functional magnetic resonance imaging. *IEEE transactions on medical imaging*  
3 **23**, 137-152 (2004).
- 4 49. Hyvarinen, A. Fast and robust fixed-point algorithms for independent component  
5 analysis. *IEEE transactions on Neural Networks* **10**, 626-634 (1999).
- 6 50. Glasser, M.F. *et al.* A multi-modal parcellation of human cerebral cortex. *Nature*  
7 **536**, 171-178 (2016).
- 8 51. Bijsterbosch, J. *et al.* Investigations into within-and between-subject resting-  
9 state amplitude variations. *Neuroimage* **159**, 57-69 (2017).
- 10 52. McKay, A. *et al.* Measurement of liver iron by magnetic resonance imaging in the  
11 UK Biobank population. *PLoS One* **13**, e0209340 (2018).
- 12 53. West, J. *et al.* Feasibility of MR-Based Body Composition Analysis in Large Scale  
13 Population Studies. *PLoS One* **11**, e0163332 (2016).
- 14 54. Wilman, H.R. *et al.* Genetic studies of abdominal MRI data identify genes  
15 regulating hepcidin as major determinants of liver iron concentration. *Journal of*  
16 *Hepatology* **71**, 594-602 (2019).
- 17 55. Ge, T., Chen, C.-Y., Ni, Y., Feng, Y.-C.A. & Smoller, J.W. Polygenic prediction via  
18 Bayesian regression and continuous shrinkage priors. *Nature Communications*  
19 **10**, 1776 (2019).
- 20 56. Yang, S. & Zhou, X. Accurate and scalable construction of polygenic scores in  
21 large biobank data sets. *The American Journal of Human Genetics* **106**, 679-693  
22 (2020).
- 23 57. Xiang, R. *et al.* Recent advances in polygenic scores: translation, equitability,  
24 methods and FAIR tools. *Genome Med* **16**, 33 (2024).
- 25 58. Lewis, C.M. & Vassos, E. Polygenic risk scores: from research tools to clinical  
26 instruments. *Genome Med* **12**, 44 (2020).
- 27 59. Moaddel, R. *et al.* Proteomics in aging research: A roadmap to clinical,  
28 translational research. *Aging Cell* **20**, e13325 (2021).
- 29 60. Mavaddat, N. *et al.* Polygenic Risk Scores for Prediction of Breast Cancer and  
30 Breast Cancer Subtypes. *Am J Hum Genet* **104**, 21-34 (2019).
- 31 61. Aly, M. *et al.* Polygenic risk score improves prostate cancer risk prediction:  
32 results from the Stockholm-1 cohort study. *Eur Urol* **60**, 21-8 (2011).

- 1 62. Desikan, R.S. *et al.* Genetic assessment of age-associated Alzheimer disease risk:  
2 Development and validation of a polygenic hazard score. *PLoS Med* **14**, e1002258  
3 (2017).
- 4 63. de Rojas, I. *et al.* Common variants in Alzheimer's disease and risk stratification  
5 by polygenic risk scores. *Nat Commun* **12**, 3417 (2021).
- 6 64. Olsson, T., Barcellos, L.F. & Alfredsson, L. Interactions between genetic, lifestyle  
7 and environmental risk factors for multiple sclerosis. *Nature Reviews Neurology*  
8 **13**, 25-36 (2017).
- 9 65. Virtanen, R., Jula, A., Kuusela, T., Helenius, H. & Voipio-Pulkki, L.M. Reduced  
10 heart rate variability in hypertension: associations with lifestyle factors and  
11 plasma renin activity. *J Hum Hypertens* **17**, 171-9 (2003).
- 12 66. Persyn, E. *et al.* Genome-wide association study of MRI markers of cerebral small  
13 vessel disease in 42,310 participants. *Nat Commun* **11**, 2175 (2020).
- 14 67. Thompson, P.M. *et al.* ENIGMA and global neuroscience: A decade of large-scale  
15 studies of the brain in health and disease across more than 40 countries.  
16 *Translational psychiatry* **10**, 100 (2020).
- 17 68. Bastarache, L. Using Phecodes for Research with the Electronic Health Record:  
18 From PheWAS to PheRS. *Annu Rev Biomed Data Sci* **4**, 1-19 (2021).
- 19 69. Dey, R. *et al.* Efficient and accurate frailty model approach for genome-wide  
20 survival association analysis in large-scale biobanks. *Nature communications* **13**,  
21 5437 (2022).
- 22 70. Bakshi, A. *et al.* A polygenic risk score predicts incident prostate cancer risk in  
23 older men but does not select for clinically significant disease. *Cancers* **13**, 5815  
24 (2021).
- 25 71. Dobson, R. & Giovannoni, G. Multiple sclerosis - a review. *Eur J Neurol* **26**, 27-40  
26 (2019).
- 27 72. Hauser, S.L. & Cree, B.A.C. Treatment of Multiple Sclerosis: A Review. *Am J Med*  
28 **133**, 1380-1390 e2 (2020).
- 29 73. Patsopoulos, N.A. Genetics of Multiple Sclerosis: An Overview and New  
30 Directions. *Cold Spring Harb Perspect Med* **8**(2018).

- 1 74. Koenig, K.A. *et al.* The relationship between cognitive function and high-  
2 resolution diffusion tensor MRI of the cingulum bundle in multiple sclerosis.  
3 *Multiple Sclerosis Journal* **21**, 1794-1801 (2015).
- 4 75. Azevedo, C.J. *et al.* Thalamic atrophy in multiple sclerosis: A magnetic resonance  
5 imaging marker of neurodegeneration throughout disease. *Ann Neurol* **83**, 223-  
6 234 (2018).
- 7 76. Minagar, A. *et al.* The thalamus and multiple sclerosis: modern views on  
8 pathologic, imaging, and clinical aspects. *Neurology* **80**, 210-9 (2013).
- 9 77. Kramer, J. *et al.* Early and Degressive Putamen Atrophy in Multiple Sclerosis. *Int J*  
10 *Mol Sci* **16**, 23195-209 (2015).
- 11 78. Tokarska, N., Tottenham, I., Baaklini, C. & Gawryluk, J.R. How does the brain age  
12 in individuals with multiple sclerosis? A systematic review. *Frontiers in Neurology*  
13 **14**, 1207626 (2023).
- 14 79. Sanusi, A.A. *et al.* Relationship of ultrasonographically determined kidney  
15 volume with measured GFR, calculated creatinine clearance and other  
16 parameters in chronic kidney disease (CKD). *Nephrol Dial Transplant* **24**, 1690-4  
17 (2009).
- 18 80. Jovanovic, D., Gasic, B., Pavlovic, S. & Naumovic, R. Correlation of kidney size  
19 with kidney function and anthropometric parameters in healthy subjects and  
20 patients with chronic kidney diseases. *Ren Fail* **35**, 896-900 (2013).
- 21 81. Xia, T. *et al.* Association between liver MRI proton density fat fraction and liver  
22 disease risk. *Radiology* **309**, e231007 (2023).
- 23 82. Zhang, Y.N. *et al.* Liver fat imaging-a clinical overview of ultrasound, CT, and MR  
24 imaging. *Br J Radiol* **91**, 20170959 (2018).
- 25 83. van der Poorten, D. *et al.* Visceral fat: a key mediator of steatohepatitis in  
26 metabolic liver disease. *Hepatology* **48**, 449-57 (2008).
- 27 84. Heikkinen, M., Salenius, J.-P. & Auvinen, O. Ruptured abdominal aortic aneurysm  
28 in a well-defined geographic area. *Journal of vascular surgery* **36**, 291-296  
29 (2002).
- 30 85. van Hout, M.J. *et al.* How to measure the aorta using MRI: a practical guide.  
31 *Journal of Magnetic Resonance Imaging* **52**, 971 (2020).



- 1 86. Litmanovich, D., Bankier, A.A., Cantin, L., Raptopoulos, V. & Boiselle, P.M. CT and  
2 MRI in diseases of the aorta. *American Journal of Roentgenology* **193**, 928-940  
3 (2009).
- 4 87. Han, X. *et al.* Genome-wide association analysis of 95 549 individuals identifies  
5 novel loci and genes influencing optic disc morphology. *Human Molecular*  
6 *Genetics* **28**, 3680-3690 (2019).
- 7 88. Crowston, J.G. *et al.* The effect of optic disc diameter on vertical cup to disc ratio  
8 percentiles in a population based cohort: the Blue Mountains Eye Study. *Br J*  
9 *Ophthalmol* **88**, 766-70 (2004).
- 10 89. Olindo, S. *et al.* Decrease in heart ventricular ejection fraction during multiple  
11 sclerosis. *Eur J Neurol* **9**, 287-91 (2002).
- 12 90. Mincu, R.I. *et al.* Impaired Cardiac Function in Patients with Multiple Sclerosis by  
13 Comparison with Normal Subjects. *Sci Rep* **8**, 3300 (2018).
- 14 91. Rowe Bijanki, K. *et al.* Characterizing white matter health and organization in  
15 atherosclerotic vascular disease: a diffusion tensor imaging study. *Psychiatry Res*  
16 **214**, 389-94 (2013).
- 17 92. Xie, H. *et al.* Arterial hypertension and retinal layer thickness: the Beijing Eye  
18 Study. *Br J Ophthalmol* **108**, 105-111 (2023).
- 19 93. Sinnott-Armstrong, N. *et al.* Genetics of 35 blood and urine biomarkers in the UK  
20 Biobank. *Nat Genet* **53**, 185-194 (2021).
- 21 94. Lin, J. *et al.* Integration of Biomarker Polygenic Risk Score Improves Prediction of  
22 Coronary Heart Disease. *JACC Basic Transl Sci* **8**, 1489-1499 (2023).
- 23 95. Kurki, M.I. *et al.* FinnGen provides genetic insights from a well-phenotyped  
24 isolated population. *Nature* **613**, 508-518 (2023).
- 25 96. DeLong, E.R., DeLong, D.M. & Clarke-Pearson, D.L. Comparing the areas under  
26 two or more correlated receiver operating characteristic curves: a nonparametric  
27 approach. *Biometrics*, 837-845 (1988).
- 28 97. Sun, B.B. *et al.* Genetic associations of protein-coding variants in human disease.  
29 *Nature* **603**, 95-102 (2022).
- 30 98. Okamoto, K. *et al.* Common variation in GPC5 is associated with acquired  
31 nephrotic syndrome. *Nature genetics* **43**, 459-463 (2011).

- 1 99. Sanchez-Rodriguez, E., Southard, C.T. & Kiryluk, K. GWAS-Based Discoveries in  
2 IgA Nephropathy, Membranous Nephropathy, and Steroid-Sensitive Nephrotic  
3 Syndrome. *Clin J Am Soc Nephrol* **16**, 458-466 (2021).
- 4 100. Investigators, A.o.U.R.P.G. Genomic data in the All of Us research program.  
5 *Nature* **627**, 340 (2024).
- 6 101. Petersen, R.C. *et al.* Alzheimer's Disease Neuroimaging Initiative (ADNI): clinical  
7 characterization. *Neurology* **74**, 201-9 (2010).
- 8 102. Fortea, J. *et al.* APOE4 homozygosity represents a distinct genetic form of  
9 Alzheimer's disease. *Nature Medicine*, 1-8 (2024).
- 10 103. Braak, H., Thal, D.R., Ghebremedhin, E. & Del Tredici, K. Stages of the pathologic  
11 process in Alzheimer disease: age categories from 1 to 100 years. *J Neuropathol*  
12 *Exp Neurol* **70**, 960-9 (2011).
- 13 104. Herrup, K. Reimagining Alzheimer's disease--an age-based hypothesis. *J Neurosci*  
14 **30**, 16755-62 (2010).
- 15 105. Counts, S.E., Ikonomic, M.D., Mercado, N., Vega, I.E. & Mufson, E.J.  
16 Biomarkers for the Early Detection and Progression of Alzheimer's Disease.  
17 *Neurotherapeutics* **14**, 35-53 (2017).
- 18 106. Dubois, B., von Arnim, C.A.F., Burnie, N., Bozeat, S. & Cummings, J. Biomarkers in  
19 Alzheimer's disease: role in early and differential diagnosis and recognition of  
20 atypical variants. *Alzheimers Res Ther* **15**, 175 (2023).
- 21 107. Barillot, C., Edan, G. & Commowick, O. Imaging biomarkers in multiple Sclerosis:  
22 From image analysis to population imaging. *Med Image Anal* **33**, 134-139 (2016).
- 23 108. Gill, A.J., Schorr, E.M., Gadani, S.P. & Calabresi, P.A. Emerging imaging and liquid  
24 biomarkers in multiple sclerosis. *Eur J Immunol* **53**, e2250228 (2023).
- 25 109. Grewal, S., McKinlay, S., Kapczinski, F., Pfaffenseller, B. & Wollenhaupt-Aguiar, B.  
26 Biomarkers of neuroprogression and late staging in bipolar disorder: A  
27 systematic review. *Aust N Z J Psychiatry* **57**, 328-343 (2023).
- 28 110. Lu, Y. *et al.* Subtyping Schizophrenia Using Psychiatric Polygenic Scores. *medRxiv*,  
29 2023.10.12.23296915 (2023).
- 30 111. Dahl, A. *et al.* Phenotype integration improves power and preserves specificity in  
31 biobank-based genetic studies of major depressive disorder. *Nat Genet* **55**, 2082-  
32 2093 (2023).

- 1 112. Dudbridge, F. Power and predictive accuracy of polygenic risk scores. *PLoS*  
2 *genetics* **9**, e1003348 (2013).
- 3 113. Wang, Y. *et al.* Theoretical and empirical quantification of the accuracy of  
4 polygenic scores in ancestry divergent populations. *Nature communications* **11**,  
5 1-9 (2020).
- 6 114. Zhao, B. & Zou, F. On polygenic risk scores for complex traits prediction.  
7 *Biometrics* **78**, 499-511 (2022).
- 8 115. Kachuri, L. *et al.* Principles and methods for transferring polygenic risk scores  
9 across global populations. *Nature Reviews Genetics*, 1-18 (2023).
- 10 116. Duncan, L. *et al.* Analysis of polygenic risk score usage and performance in  
11 diverse human populations. *Nature communications* **10**, 1-9 (2019).
- 12 117. Zhao, B., Yang, X. & Zhu, H. Estimating trans-ancestry genetic correlation with  
13 unbalanced data resources. *arXiv preprint arXiv:2203.12154* (2022).
- 14 118. Sudlow, C. *et al.* UK biobank: an open access resource for identifying the causes  
15 of a wide range of complex diseases of middle and old age. *PLoS medicine* **12**,  
16 e1001779 (2015).
- 17 119. Ji, J.L. *et al.* Mapping the human brain's cortical-subcortical functional network  
18 organization. *Neuroimage* **185**, 35-57 (2019).
- 19 120. Liu, Y. *et al.* Genetic architecture of 11 organ traits derived from abdominal MRI  
20 using deep learning. *Elife* **10**(2021).
- 21 121. Sorokin, E.P. *et al.* Analysis of MRI-derived spleen iron in the UK Biobank  
22 identifies genetic variation linked to iron homeostasis and hemolysis. *Am J Hum*  
23 *Genet* **109**, 1092-1104 (2022).
- 24 122. Wilman, H.R. *et al.* Characterisation of liver fat in the UK Biobank cohort. *PLoS*  
25 *One* **12**, e0172921 (2017).
- 26 123. Mojtahed, A. *et al.* Reference range of liver corrected T1 values in a population  
27 at low risk for fatty liver disease-a UK Biobank sub-study, with an appendix of  
28 interesting cases. *Abdom Radiol (NY)* **44**, 72-84 (2019).
- 29 124. Karlsson, A. *et al.* Automatic and quantitative assessment of regional muscle  
30 volume by multi-atlas segmentation using whole-body water-fat MRI. *J Magn*  
31 *Reson Imaging* **41**, 1558-69 (2015).

- 1 125. Borga, M. *et al.* Validation of a fast method for quantification of intra-abdominal  
2 and subcutaneous adipose tissue for large-scale human studies. *NMR Biomed* **28**,  
3 1747-53 (2015).
- 4 126. Linge, J. *et al.* Body Composition Profiling in the UK Biobank Imaging Study.  
5 *Obesity (Silver Spring)* **26**, 1785-1795 (2018).
- 6 127. Borga, M. *et al.* Reproducibility and repeatability of MRI-based body composition  
7 analysis. *Magn Reson Med* **84**, 3146-3156 (2020).
- 8 128. Langner, T. *et al.* Kidney segmentation in neck-to-knee body MRI of 40,000 UK  
9 Biobank participants. *Sci Rep* **10**, 20963 (2020).
- 10 129. Jiang, L. *et al.* A resource-efficient tool for mixed model association analysis of  
11 large-scale data. *Nat Genet* **51**, 1749-1755 (2019).
- 12 130. Bycroft, C. *et al.* The UK Biobank resource with deep phenotyping and genomic  
13 data. *Nature* **562**, 203-209 (2018).
- 14 131. Purcell, S. *et al.* PLINK: a tool set for whole-genome association and population-  
15 based linkage analyses. *The American Journal of Human Genetics* **81**, 559-575  
16 (2007).
- 17 132. Mullins, N. *et al.* Genome-wide association study of more than 40,000 bipolar  
18 disorder cases provides new insights into the underlying biology. *Nature genetics*  
19 **53**, 817-829 (2021).
- 20 133. Program, A.o.U.R. All of Us Research Program Genomic Research Data Quality  
21 Report, All of Us Curated Data Repository (CDR) release C2022Q4R9. Vol. 2024  
22 (2024).
- 23 134. Guo, Y. *et al.* Plasma proteomic profiles predict future dementia in healthy  
24 adults. *Nature Aging*, 1-14 (2024).
- 25 135. Lumsden, A.L., Mulugeta, A., Zhou, A. & Hypponen, E. Apolipoprotein E (APOE)  
26 genotype-associated disease risks: a phenome-wide, registry-based, case-control  
27 study utilising the UK Biobank. *EBioMedicine* **59**, 102954 (2020).

28

## 29 **METHODS**

### 30 **Imaging traits.**

1 The imaging data used in our study were obtained from the UKB study, which recruited  
2 around 500,000 individuals between the ages of 37 and 73 (229,114 males) between 2006  
3 and 2010<sup>118</sup> (<https://www.ukbiobank.ac.uk/>). The ethics approval of the UKB study was  
4 obtained from the North West Multicentre Research Ethics Committee (approval number:  
5 11/NW/0382). We used a total of 4,206 brain MRI IDPs, 41 abdominal MRI IDPs, 82 heart  
6 CMR IDPs, and 46 eye OCT IDPs. The brain MRI IDPS consisted of 301 BIG-KP<sup>33,35,37</sup> and  
7 3,905 UKB-Oxford<sup>1,2,34</sup> traits. The BIG-KP traits were from our previous studies on three  
8 brain MRI modalities. First, we obtained 101 regional brain volumes<sup>33</sup> from sMRI by  
9 applying the advanced normalization tools<sup>45</sup>. Second, we generated 110 tract-averaged  
10 DTI parameters<sup>35</sup> from dMRI using the ENIGMA-DTI pipeline<sup>46,47</sup>. Third, for rfMRI, we  
11 partitioned the cerebral cortex into 360 brain areas using the Glasser360 parcellation<sup>50</sup>.  
12 We obtained 90 functional activity (amplitude) and functional connectivity (edge) traits<sup>37</sup>  
13 for 12 functional networks<sup>119</sup>. The UKB-Oxford had 1,437 IDPs from sMRI (including  
14 susceptibility-weighted structural imaging), 675 from dMRI, 1,777 from rfMRI, and 16  
15 from task-based tfMRI. Specifically, the sMRI IDPs consisted of FIRST (Category 1102),  
16 FAST (Category 1101), FreeSurfer ASEG (Category 190), FreeSurfer BA exvivo (Category  
17 195), FreeSurfer a2009s (Category 197), FreeSurfer DKT (Category 196), FreeSurfer  
18 desikan gw (Category 194), FreeSurfer desikan pial (Category 193), FreeSurfer desikan  
19 white (Category 192), FreeSurfer subsegmentation (Category 191), regional T2\* (Category  
20 109), and white matter hyperintensity volume (Category 112). The 675 dMRI IDPs  
21 included 432 TBSS-processed IDPs from Category 134 and 243 ProbtrackX-processed IDPs  
22 from Category 135. The 1,777 rfMRI IDPs consisted of 76 activity amplitude (node) traits  
23 and 1,701 functional connectivity (edge) traits (Category 111). They were parcellation-  
24 free and generated by whole brain spatial ICA<sup>1,2,48,49</sup>. Lastly, there were 16 tfMRI IDPs  
25 from Category 106. The details of the image acquisition, preprocessing procedures, and  
26 quality controls were available in the UKB Brain Imaging Documentation  
27 ([https://biobank.ctsu.ox.ac.uk/crystal/crystal/docs/brain\\_mri.pdf](https://biobank.ctsu.ox.ac.uk/crystal/crystal/docs/brain_mri.pdf)). The 41 abdominal  
28 MRI IDPs<sup>53,120-128</sup> were from abdominal organ composition (Category 158), kidney-derived  
29 measures (Category 159), liver MRI (Category 126), and abdominal composition (Category  
30 149). For the 82 heart CMR IDPs, the details of the image acquisition, preprocessing  
31 procedures, and quality controls were described in previous studies<sup>3,29</sup>. The 46 eye OCT

1 IDPs were all from derived OCT measures<sup>40</sup> (Category 100079). A list of these IDPs can be  
2 found in **Table S1**.

3

#### 4 **IGS and dPRS constructions.**

5 We performed the following genetic quality controls (QCs) for the set of participants with  
6 both IDP and genetic data<sup>37</sup>: 1) removed individuals with missing genotype rate > 0.1; 2)  
7 removed variants with missing genotype rate > 0.1; 3) removed variants with minor allele  
8 frequency (MAF) < 0.01; and 4) removed variants that failed the Hardy-Weinberg test for  
9 equilibrium at  $1 \times 10^{-7}$  level. Using individuals of British European ancestry, the GWAS was  
10 performed using linear mixed effect models via fastGWA<sup>129</sup> (average  $n = 34,286$  for brain,  
11 average  $n = 31,875$  for heart, average  $n = 39,830$  for abdomen, and average  $n = 54,761$   
12 for eye). The adjusting covariates included age (at imaging), age-squared, sex, the  
13 interaction between age and sex, the interaction between age-squared and sex, first 40  
14 genetic principal components<sup>130</sup> (PCs) for all organs; and additionally the estimated total  
15 intracranial volume (eTIV), head motion measurements and their squares, brain position  
16 measurements and their squares, and volumetric scaling for brain IDPs. Additionally, for  
17 BIG-KP regional brain volumes, the total brain volume (TBV) was included as an adjusting  
18 covariate to remove global effects<sup>33</sup>. For TBV, the eTIV and volumetric scaling were not  
19 included as covariates due to their high linearity. With the GWAS summary statistics as  
20 input, we used PRS-CS<sup>55</sup> and DBSLMM<sup>56</sup> to obtain the weights for IGS. The  
21 hyperparameters of both methods were the default values and/or the automatically  
22 tuned values. We then used PLINK<sup>131</sup> to generate risk scores in testing data by  
23 summarizing across genetic variants, weighed by their weights.

24

25 The prediction accuracy of IGS was measured by the incremental  $R^2$ , which was the  
26 additional phenotypic variation that can be explained by the IGS while adjusting for the  
27 effects of covariates in a linear regression model. The covariates included age, age-  
28 squared, sex, the interaction between age and sex, the interaction between age-squared  
29 and sex, and the first 40 genetic PCs. The prediction accuracy was estimated separately in  
30 three independent hold-out datasets corresponding to European, Asian, and African  
31 ancestries. The European hold-out dataset consisted of UKB individuals of British or non-  
32 British European ancestry with IDP data and unrelated to the IGS training set used to

1 generate IDP GWAS (average  $n = 4,541$ ). The Asian hold-out dataset consisted of UKB  
2 individuals of Bangladeshi, Chinese, Indian, or Pakistani ancestry with IDP data (average  
3  $n = 460$ ). The African hold-out dataset consisted of UKB individuals of African or Caribbean  
4 ancestry with IDP data (average  $n = 252$ ).

5

6 We also used PRS-CS<sup>55</sup> to construct dPRS. Out of the 110 phecode-based diseases that  
7 had IGS stratification signals on UKB (**Tables S10-S11**), we mapped 105 diseases to 75  
8 FinnGen R9 disease endpoints that had publicly available GWAS summary statistics (**Table**  
9 **S14**). We used the FinnGen-phecode mapping in Sun et al<sup>97</sup> and disease description from  
10 the FinnGen release R9. For the bipolar disorder analysis on AOU, we used GWAS  
11 summary statistics from the Psychiatric Genomics Consortium<sup>132</sup> to construct BD dPRS.

12

### 13 **IGS-phenotype associations.**

14 We used a discovery-replication design to examine associations between IGS and  
15 phenotypes in UKB participants without brain or body IDPs. We randomly selected 70%  
16 of UKB unrelated British European individuals (average  $n = 202,893$ ) as the discovery  
17 dataset for IGS-phenotype associations, while the remaining 30% of UKB unrelated British  
18 European individuals, all UKB unrelated non-British European individuals, and all  
19 unrelated non-European individuals (average  $n = 129,333$ ) were used as the replication  
20 dataset. We treated the values greater than five times the median absolute deviation  
21 from the median as outliers and removed these values. A total of 189 UKB phenotypes  
22 were tested, which represented a wide range of traits from various domains. Specifically,  
23 the 189 UKB phenotypes included 24 mental health traits (Category 100060), 5 cognitive  
24 traits (Category 100026), 12 physical activity traits (Category 100054), 6 electronic device  
25 use traits (Category 100053), 8 sun exposure traits (Category 100055), 3 sexual factor  
26 traits (Category 100056), 3 social support traits (Category 100061), 21 diet traits (Category  
27 100052), 9 alcohol drinking traits (Category 100051), 6 smoking traits (Category 100058),  
28 34 blood biochemistry biomarkers (Category 17518), 3 blood pressure traits (Category  
29 100011), 3 spirometry traits (Category 100020), 17 early life factors (Categories 135,  
30 100033 and 100072), 9 greenspace and coastal proximity (Category 151), 2 hand grip  
31 strength (Category 100019), 13 residential air pollution traits (Category 114), 5 residential  
32 noise pollution traits (Category 115), 2 body composition traits by impedance (Category

1 100009), 3 female specific factors (Category 100069), and 1 education trait (Category  
2 100063) (**Table S6**).

3

4 Association testing was then conducted to examine the linear relationship between the  
5 4,375 IDP-derived IGS and the 189 UKB phenotypes. We adjusted for the same set of  
6 covariates separately in the discovery set and the replication set, including age, age-  
7 squared, sex, the interaction between age and sex, the interaction between age-squared  
8 and sex, and 40 genetic PCs. Specifically, we regressed the IDP-derived IGS onto the UKB  
9 phenotypes and calculated *P*-values using a two-sided t-test. We prioritized the results  
10 that met the following three criteria: 1) significant at 0.05 level after Bonferroni correction  
11 in the discovery dataset; 2) significant at a nominal significance level of 0.05 in the  
12 replication dataset; and 3) had regression coefficients with matching directions in both  
13 the discovery and replication datasets.

14

#### 15 **Disease risk stratifications.**

16 We used IGS to stratify 871 phecode-based<sup>68,69</sup> diseases (**Table S5**) separately on the UKB  
17 discovery cohort and the UKB replication cohort. The UKB discovery cohort consisted of  
18 unrelated British European participants without brain or body IDPs (average  $n = 318,781$ ).  
19 The UKB replication cohort consisted of unrelated non-British European participants and  
20 unrelated non-European participants, all without brain or body IDPs (average  $n = 48,015$ ).  
21 In each cohort, we residualized IGS with the same covariates used in the association  
22 analysis, standardized the residualized IGS to mean 0 and standard deviation 1, sorted all  
23 participants according to the value of the standardized IGS, and split participants into  
24 three groups: the group of smallest 10% IGS, the group of largest 10% IGS, and the group  
25 of middle 80% IGS. The group of the smallest 10% IGS was referred to as the lower 10%  
26 tail, and the group of the largest 10% IGS was referred to as the upper 10% tail. For each  
27 disease, the number of disease cases was counted, and a chi-squared test of three levels  
28 of IGS-based groups (the smallest 10%, middle 80%, and the largest 10%) and two levels  
29 of disease status (case/control) was conducted. The original IGS tail case ratios between  
30 the two 10% tails were computed for all IGS-disease pairs and were reported in  
31 supplementary tables (**Tables S10-S11**), which were defined as (the number of patients  
32 in IGS upper 10% tail) / (the number of patients in IGS lower 10% tail). In **Figures 2** and **S9**,



1 we visualized the maximum of the original IGS tail case ratio and its inverse, that is, a  
2 number always greater than or equal to 1. We also only visualized the IGS-disease pairs  
3 whose IGS tails contained above-average disease patients. That is, one or both of the two  
4 10% tails of IGS contained at least 10% of all cases on the UKB discovery cohort. In total,  
5 6 pairs between brain IGS and brain/mental disorders, 3 pairs between abdominal IGS  
6 and genitourinary/digestive diseases, 3 pairs between heart IGS and circulatory system  
7 diseases, and 2 pairs between brain/abdominal/eye IGS and circulatory systems diseases  
8 were not visualized because of this.

9

10 For Alzheimer's disease/dementia analysis on AOU, unlike UKB age distribution (**Fig.**  
11 **S15A**), AOU had a bimodal distribution (**Fig. S15B**), and thus we restricted our AOU  
12 analysis to participants of age between 60 and 90 (at the age of incidence for patients and  
13 at the time of survey otherwise), and only included those self-identified as European  
14 ('White') ( $n = 59,261, 26,881$  males at birth). For the Alzheimer's disease/dementia  
15 patients, we used age at incidence for the analysis in **Figure 4C**, and age at survey for the  
16 controls. Due to the lower disease percentage in AOU, we used both Alzheimer's disease  
17 (ICD-10 code: G30) and dementia (ICD-10 code: F01-F03) for cases, and the rest as  
18 controls. For multiple sclerosis analysis on AOU, we used all participants self-identified as  
19 European ( $n = 128,515, 51,390$  males at birth, age range = [17, 113]) and all participants  
20 self-identified as African ('Black'), or Hispanic, or Asian (African  $n = 50,139, 21,684$  males  
21 at birth, age range = [17, 104]; Hispanic  $n = 41,575, 13,461$  males at birth, age range = [17,  
22 100]; Asian  $n = 7,603, 3,066$  males at birth, age range = [17, 100]). For bipolar disorder  
23 analysis on AOU, we used all participants self-identified as European. Multiple sclerosis  
24 patients were those diagnosed with ICD-10 G35, and bipolar disorder patients were those  
25 diagnosed with ICD-10 F31. Using PLINK, we developed IGS and dPRS using the Allele  
26 Count/Allele Frequency threshold genotyping data prepared by AOU and the UKB weights  
27 generated from PRS-CS. We removed the effects of age, sex and 16 genetic PCs from IGS  
28 and dPRS, where the genetic PCs were prepared by AOU as well<sup>133</sup>.

29

30 For ADNI, we used participants of age at least 60 ( $n = 1,116, 656$  males, age range = [60,  
31 91]), the participants whose final diagnosis was dementia were used as cases and the rest  
32 as controls (dementia percentage = 42.92%). After performing the standard genetic QCs<sup>33</sup>,

1 we developed the IGS and dPRS using UKB-derived weights and removed the effects of  
2 age and sex .

3

#### 4 **AUC analysis.**

5 To measure the contribution from a single IGS to disease prediction, we trained the  
6 following logistic regression models: (1) a baseline model that predicts disease status  
7 using age and sex as predictors, and (2) an IGS model that predicts disease status using  
8 age, sex, and one IGS. We constructed an IGS model for each IGS-disease pair that had  
9 significant stratification (**Tables S12-S13**), a total of 919 IGS models. The increment in the  
10 AUC of the IGS model compared with the baseline model is the AUC gain by including a  
11 single IGS and visualized in **Figures 3A-C and S9**. DeLong test<sup>96</sup> was used to test for the  
12 difference in AUC between the baseline model and the IGS model. All AUC was obtained  
13 using case-control matched individuals. For each disease, each patient was matched with  
14 five participants free of this disease<sup>134</sup>, of same age and sex, and of British European  
15 ancestry.

16

17 To measure the contribution from IGS when dPRS was included, we considered two  
18 logistic regression models for disease status prediction: (1) a baseline-dPRS model that  
19 included age, sex, and the corresponding dPRS, and (2) an IGS-dPRS model that included  
20 age, sex, dPRS, and IGS that marginally stratified this disease. The IGS-dPRS model was  
21 selected from the better one between using all stratifying IGS and using only the IGS with  
22 the largest stratification tail case ratio. The difference between the AUC of the IGS-dPRS  
23 model and the AUC of the baseline-dPRS model was the measure of IGS contribution to  
24 disease prediction given dPRS. We averaged the AUC across repeated 100 runs with two-  
25 fold cross-validation. The increment in the average AUC of the IGS-dPRS model compared  
26 with the average AUC of the baseline-dPRS model is the AUC gain visualized in **Figure 3D**.  
27 Wilcoxon rank sum test was used to test for the difference in AUC between the baseline-  
28 dPRS model and the IGS-dPRS model across all cross-validation replications.

29

#### 30 **IGS burden scores.**

31 The brain IGS for Alzheimer's disease stratification on UKB cohorts was selected according  
32 to four criteria below: (1) on the UKB discovery cohort, the IGS stratified disease cases so

1 that the chi-squared test was significant after controlling the FDR at a 5% level; (2) the IGS  
2 had one of its two 10% tails containing at least 10% of all disease cases of UKB discovery  
3 cohort; (3) the IGS had one of its two 10% tails containing at most 10% of all disease cases  
4 of UKB discovery cohort; and (4) the IGS tail case ratio direction was consistent between  
5 the UKB discovery cohort and the UKB replication cohort (that is, the 10% tail that  
6 contained more disease cases was consistent on both cohorts). There were 55 IGS that  
7 satisfied these conditions and were selected for Alzheimer’s disease stratification (**Table**  
8 **S16**). In **Figures 4A-4B, 4E-4F** and **5**, within each group (defined by age, or by dPRS, or by  
9 *APOE* status, or by both *APOE* status and dPRS), brain IGS were selected with the following  
10 two criteria: (1) the IGS was selected for disease stratification on the entire cohort (that  
11 is, among the 55 selected IGS above); and (2) the 10% IGS tail in the group that contained  
12 more cases was also the 10% IGS tail that had contained more cases on the entire cohort  
13 (that is, the IGS high-risk tail that contained more disease cases remained consistent in  
14 this age/dPRS/*APOE*-defined group).

15

16 IGS burden score of a participant was the number of “IGS high-risk tails” a participant was  
17 in. The “IGS high-risk tail” for IGS burden score was the 20% top tail of an IGS that  
18 contained more patients compared to the lower 20% tail. We constructed an IGS burden  
19 score by counting the number of IGS high-risk tails a subject was in, across the selected  
20 IGS. For example, if a subject was ranked in the top 20% for five out of the selected brain  
21 IGS, they would be assigned an IGS burden score of five. As IGS burden score is an integer  
22 as small as zero, for each group, we selected the “Low IGS burden score” to be the  
23 smallest nonnegative integer values that corresponded to around 20% of all participants  
24 in this group, and the “Higher IGS burden score” to be the largest integer values that  
25 corresponded to around 20% of all participants in this group. Within a group, the  
26 participants with IGS burden score among the “Lower IGS burden score” values were  
27 categorized as “Lower IGS burden score”, and likewise, those with IGS burden score  
28 among the “Higher IGS burden score” values were categorized as “Higher IGS burden  
29 score”. Due to smaller sample size and higher dementia percentage in ADNI, ADNI IGS  
30 burden score used 10% tail for “IGS high-risk tail”. Besides, ADNI had “Lower IGS burden  
31 score” cutoff at 10% for age analysis (**Fig. 4D**).

32

1 Similar to UKB analysis, we grouped AOU participants of European ancestry into different  
2 groups (by age as in **Fig. 4C** or by dPRS as in **Fig. 4G**). For each stratum, we again calculated  
3 the IGS tail case ratio for the 55 selected IGS and only kept the IGS that had case ratio  
4 direction consistent with the UKB discovery cohort, and categorized participants inside  
5 each stratum into “Lower IGS burden score” and “Higher IGS burden score”. Similar  
6 analysis was performed for ADNI participants (**Figs. 4D** and **4H**).

7

8 For multiple sclerosis stratification on UKB and AOU, similar to Alzheimer’s disease, we  
9 applied the following criterion to select the brain IGS for IGS burden score: (1) on the UKB  
10 discovery cohort, the IGS stratified multiple sclerosis cases so that the chi-squared test  
11 was significant after controlling the FDR at a 5% level; (2) the IGS had one of its two 10%  
12 tails containing at least 10% of all multiple sclerosis cases of UKB discovery cohort; (3) the  
13 IGS had one of its two 10% tails containing at most 10% of all multiple sclerosis cases of  
14 UKB discovery cohort; and (4) the IGS tail case ratio direction was consistent between the  
15 UKB discovery cohort and the UKB replication cohort (that is, the 10% tail that contained  
16 more cases was consistent on both cohorts). There were 25 IGS that satisfied these  
17 conditions and were selected for IGS burden score of multiple sclerosis (**Table S17**), and  
18 then stratification within group defined by multiple sclerosis dPRS were carried out using  
19 IGS burden score, similar to Alzheimer’s disease analysis described above.

20

#### 21 ***APOE* status.**

22 We extracted *APOE* genotypes for UKB participants based on the genetic variants  
23 rs429358 and rs7412. Following prior studies on *APOE*<sup>135</sup>, we considered five common  
24 *APOE* genotypes ( $\epsilon 4\epsilon 4$ ,  $\epsilon 3\epsilon 4$ ,  $\epsilon 3\epsilon 3$ ,  $\epsilon 2\epsilon 3$  and  $\epsilon 2\epsilon 2$ ) and mapped the alleles of rs429358  
25 and rs7412 as follows: rs429358 CC and rs7412 CC to  $\epsilon 4\epsilon 4$ , rs429358 TC and rs7412 CC to  
26  $\epsilon 3\epsilon 4$ , rs429358 TT and rs7412 CC to  $\epsilon 3\epsilon 3$ , rs429358 TT and rs7412 TC to  $\epsilon 2\epsilon 3$ , and  
27 rs429358 TT and rs7412 TT to  $\epsilon 2\epsilon 2$ . Here  $\epsilon 4\epsilon 4$  are  $\epsilon 4$  homozygotes,  $\epsilon 3\epsilon 4$  are  $\epsilon 4$   
28 heterozygotes,  $\epsilon 3\epsilon 3$  are  $\epsilon 3$  homozygotes, and  $\epsilon 2\epsilon 2$  and  $\epsilon 2\epsilon 3$  are  $\epsilon 2$  carriers. We also  
29 combined  $\epsilon 4$  homozygotes and  $\epsilon 4$  heterozygotes as “ $\epsilon 4$  carriers” in **Figures 5A** and **5E**.

30

#### 31 **Code availability.**

1 We made use of publicly available software and tools. The list of genetic variants and their  
2 weights used for the construction of IGS for UKB brain and body IDPs are available at  
3 [https://github.com/xcyang17/IPRS\\_UKB](https://github.com/xcyang17/IPRS_UKB).

#### 4 5 **Data availability.**

6 The individual-level data used in this study can be obtained from  
7 <https://www.ukbiobank.ac.uk/> and <http://adni.loni.usc.edu/data-samples/>. The disease  
8 GWAS data can be downloaded from [https://www.finngen.fi/en/access\\_results](https://www.finngen.fi/en/access_results) and  
9 [https://figshare.com/articles/dataset/bip2021\\_noUKBB/22564402](https://figshare.com/articles/dataset/bip2021_noUKBB/22564402). Our IGS data  
10 resources can be downloaded at Zenodo (<https://doi.org/10.5281/zenodo.7709788>).

11

#### 12 **Figure legends.**

##### 13 **Fig. 1 Study overview and prediction analysis.**

14 **(A)** An overview of the study design. **(B)** The incremental prediction  $R^2$  of brain and body  
15 IGS in the hold-out UK Biobank (UKB) testing sets of European, Asian, and African  
16 ancestries. The structural MRI (sMRI) modality consisted of 101 BIG-KP regional brain  
17 volumes, the diffusion MRI (dMRI) modality consisted of 110 BIG-KP DTI parameters, and  
18 the resting functional MRI (rfMRI) modality consisted of 90 BIG-KP parcellation-based  
19 traits and 82 UKB-Oxford ICA-based rfMRI traits. The abdominal MRI (Abd MRI) modality  
20 consisted of 41 abdominal MRI traits, the eye OCT modality consisted of 46 eye traits, and  
21 the heart CMR modality consisted of 82 UKB heart CMR traits. The results of other IGS  
22 can be found in **Figure S1**. We display the IGS that significantly predicted the  
23 corresponding IDPs in the European dataset after controlling the FDR rate at a 5% level.

24 **(C)** The incremental prediction  $R^2$  of these IGS in the European and Asian testing datasets.

25 **(D)** The incremental prediction  $R^2$  of these IGS in the European and African testing  
26 datasets. In **(C)-(D)**, the IGS with the highest prediction  $R^2$  in the European testing set in  
27 each modality was marked by an arrow and text. ICA stands for independent component  
28 analysis, INL stands for inner nuclear layer, and RPE stands for retinal pigment epithelium.

29

##### 30 **Fig. 2 IGS stratification of brain and heart disorders.**

31 **(A)-(D)** The IGS-disease pairs after controlling the FDR rate at a 5% level on UKB discovery  
32 cohort, replicated on UKB replication cohort, and with IGS tail case ratio greater than 1.1

1 (brain) or 1.2 (heart) are displayed. Each point represents an IGS-disease pair. The y-axis  
2 shows the disease name and the associated phecode (for example, the phecode of  
3 Alzheimer's Disease is 290.11). The x-axis shows the disease case ratio between the two  
4 IGS tails. We show the results for UKB discovery cohort. **(E)-(F)** For the pair between aortic  
5 aneurysm (AA) and AAO\_max\_area (ascending aorta maximum area), we show the  
6 disease percentage (y-axis) in quantile-based groups defined by AAO\_max\_area IGS (x-  
7 axis) in the UKB discovery and UKB replication cohorts. The horizontal grey dashed line  
8 represents the disease percentage for the entire cohort.

9

10 **Fig. 3 AUC of IGS for disease prediction.**

11 **(A)-(C)** AUC gain of disease prediction on UKB discovery cohort by including the stratifying  
12 IGS for IGS-disease pairs that were significant on UKB discovery cohort after controlling  
13 the FDR rate at a 5% level, replicated on UKB replication cohort, and with IGS tail case  
14 ratio greater than 1.1 (brain) or 1.2 (heart). Each point represents an IGS-disease pair. The  
15 y-axis shows the disease name and the associated phecode. The x-axis shows the AUC  
16 gain from the IGS model compared with the baseline model. **(D)** AUC gain of disease  
17 prediction on UKB discovery cohort by including the most stratifying IGS or all stratifying  
18 IGS in the IGS-dPRS model, compared with the baseline-dPRS model. The diseases with  
19 IGS stratification patterns visualized in **Figures 3E-3H and S11** was marked by an arrow  
20 and text. **(E)-(H)** For four select diseases, for each disease polygenic risk score (dPRS)  
21 quantile group (x-axis), we show the disease percentage (y-axis) for all participants ("All  
22 subjects"), participants in the low 10% tail of the prediction of the IGS-dPRS model of the  
23 disease ("Prediction lower tail"), and participants in the high 10% tail of the prediction of  
24 the IGS-dPRS model ("Prediction higher tail"). We show the results for UKB discovery  
25 cohort.

26

27 **Fig. 4 IGS stratification of Alzheimer's disease across age and disease polygenic risk**  
28 **score groups.**

29 **(A)-(D)** For each age group (x-axis), we show the Alzheimer's disease (AD) or dementia  
30 percentage (y-axis) for all participants ("All subjects"), participants in the low 20% tail of  
31 IGS burden score ("Lower IGS burden score"), and participants in the high 20% tail of IGS  
32 burden score ("Higher IGS burden score"). **(E)-(H)** For each dPRS quantile group (x-axis),

1 we show the AD or dementia percentage ( $y$ -axis) for all participants (“All subjects”),  
2 participants in the low 20% tail of IGS burden scores (“Lower IGS burden score”), and  
3 participants in the high 20% tail of IGS burden scores (“Higher IGS burden score”). We  
4 show the results for UKB discovery (left panels), UKB replication (middle-left panels), AOU  
5 European (middle-right panels), and ADNI (right panels) cohorts.

6

7 **Fig. 5 IGS stratification of Alzheimer's disease on the basis of *APOE* status and disease**  
8 **polygenic risk score.**

9 **(A)** For each *APOE* group ( $y$ -axis), we show the relative change in Alzheimer's Disease (AD)  
10 percentage ( $x$ -axis) in the low 20% tail of IGS burden score (“Lower IGS burden score”)  
11 and in the high 20% tail of IGS burden score (“Higher IGS burden score”) compared to the  
12 overall AD percentage of the *APOE* group (decimals at  $x=0$ ). **(B)-(F)** For five *APOE* groups,  
13 for each dPRS quantile group ( $x$ -axis), we show the AD percentage ( $y$ -axis) for all  
14 participants (“All subjects”), participants in the low 20% tail of IGS burden score (“Lower  
15 IGS burden score”), and participants in the high 20% tail of IGS burden score (“Higher IGS  
16 burden score”). We show the results for the UKB discovery cohort.

17

18 **Fig. 6 IGS stratification of multiple sclerosis.**

19 **(A)-(B)** For the pair between multiple sclerosis (MS) and left.putamen (left putamen  
20 volume), we show the disease percentage ( $y$ -axis) in quantile-based groups defined by  
21 left.putamen IGS ( $x$ -axis) in the UKB discovery and AOU European cohorts. The horizontal  
22 grey dashed line represents the disease percentage for the entire cohort. **(C)-(E)** For each  
23 dPRS quantile group ( $x$ -axis), we show the MS percentage ( $y$ -axis) for all participants (“All  
24 subjects”), participants in the low 20% tail of IGS burden scores (“Lower IGS burden  
25 score”), and participants in the high 20% tail of IGS burden scores (“Higher IGS burden  
26 score”). We show the results for UKB discovery, UKB replication, AOU European, and AOU  
27 non-European cohorts.

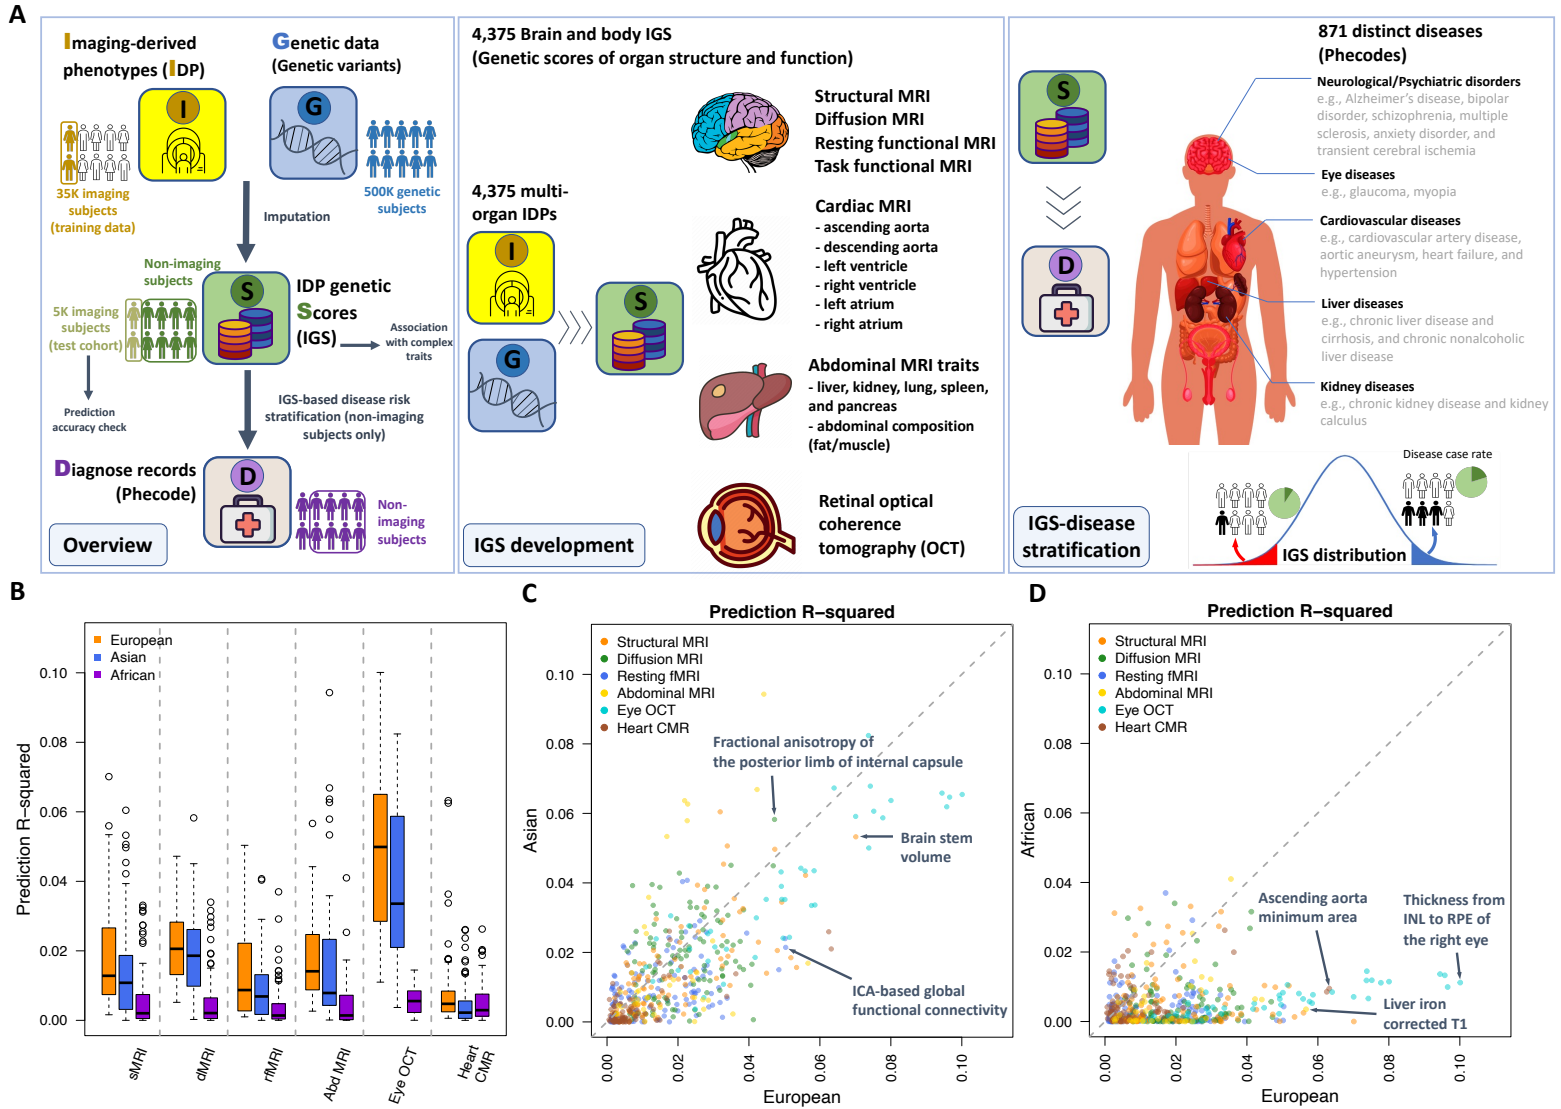

Figure 1



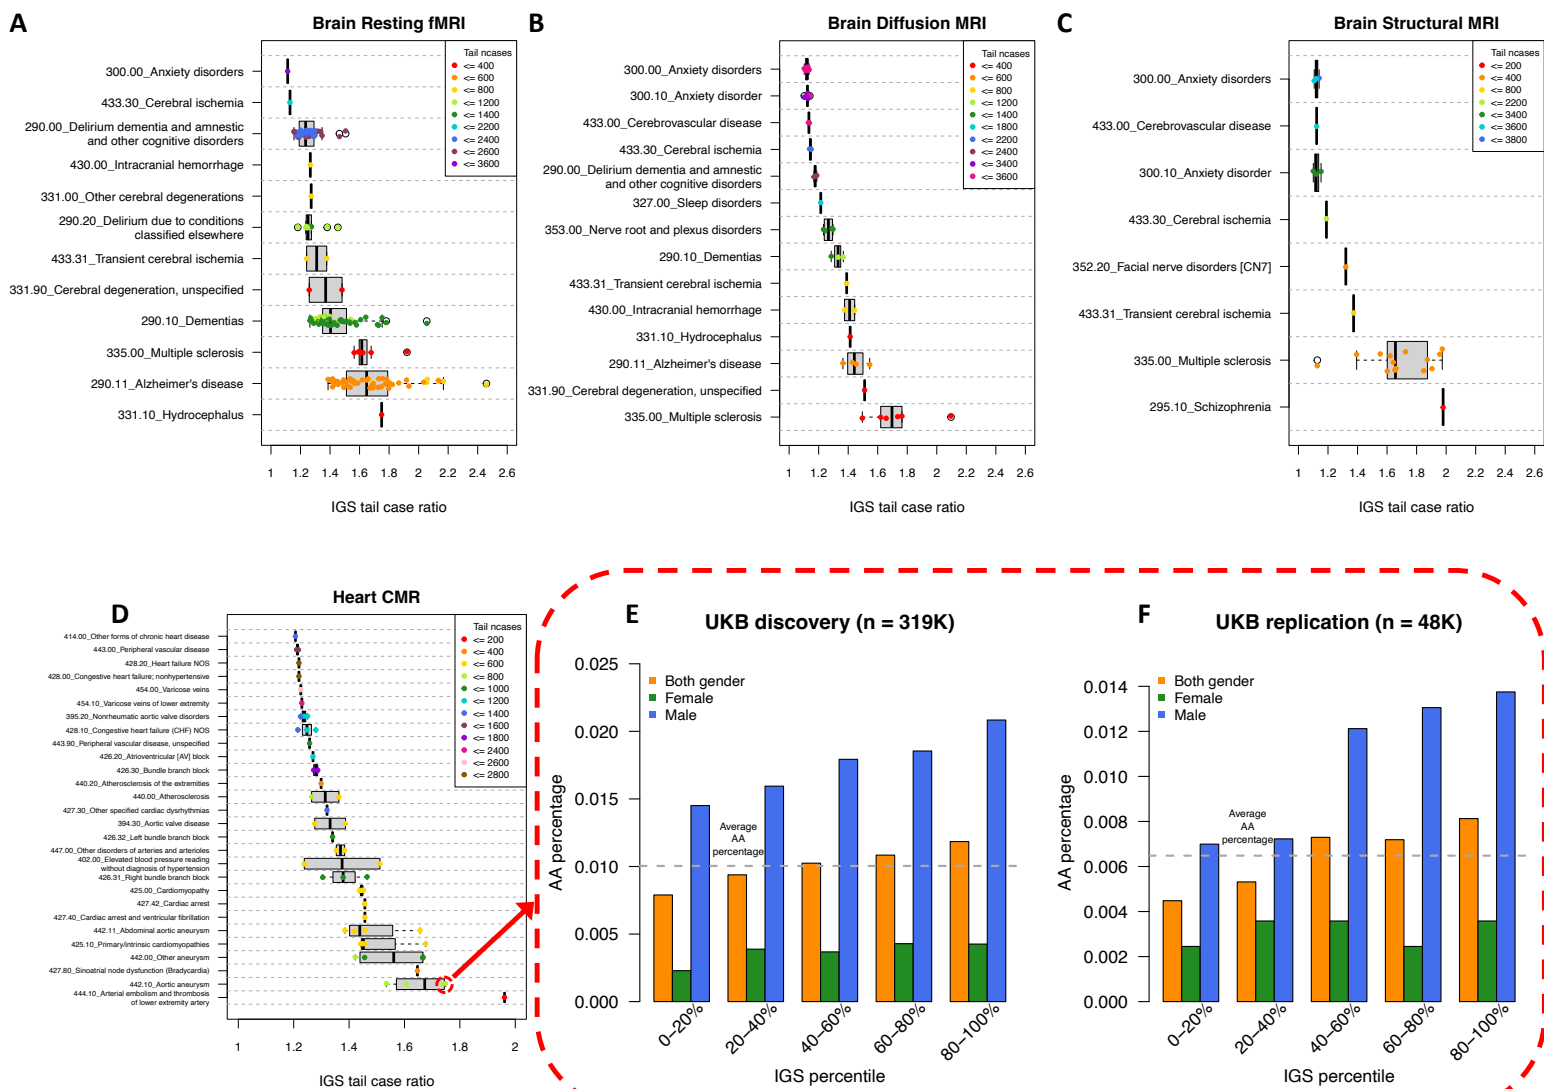

Figure 2

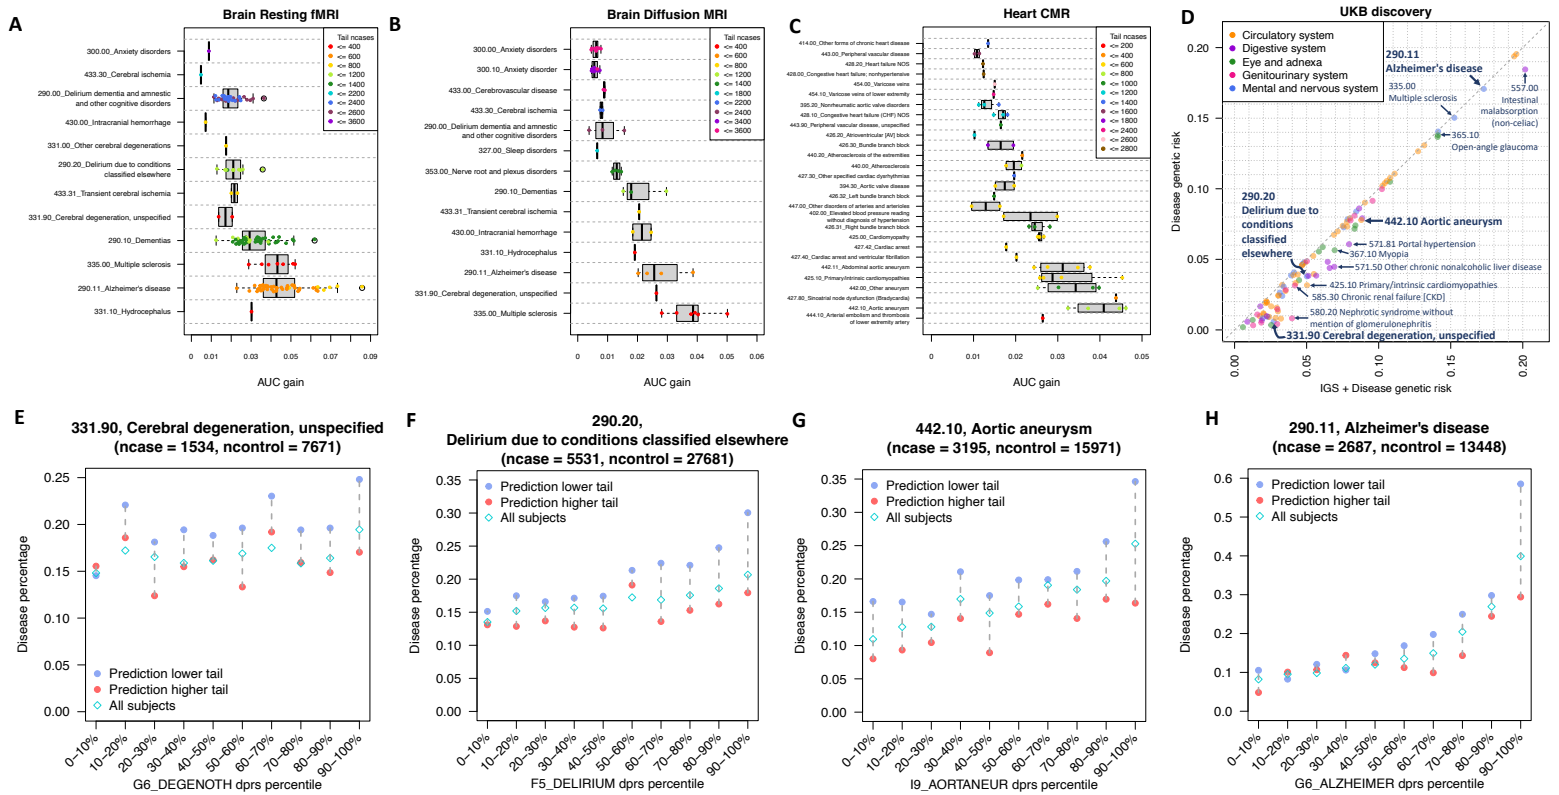

Figure 3

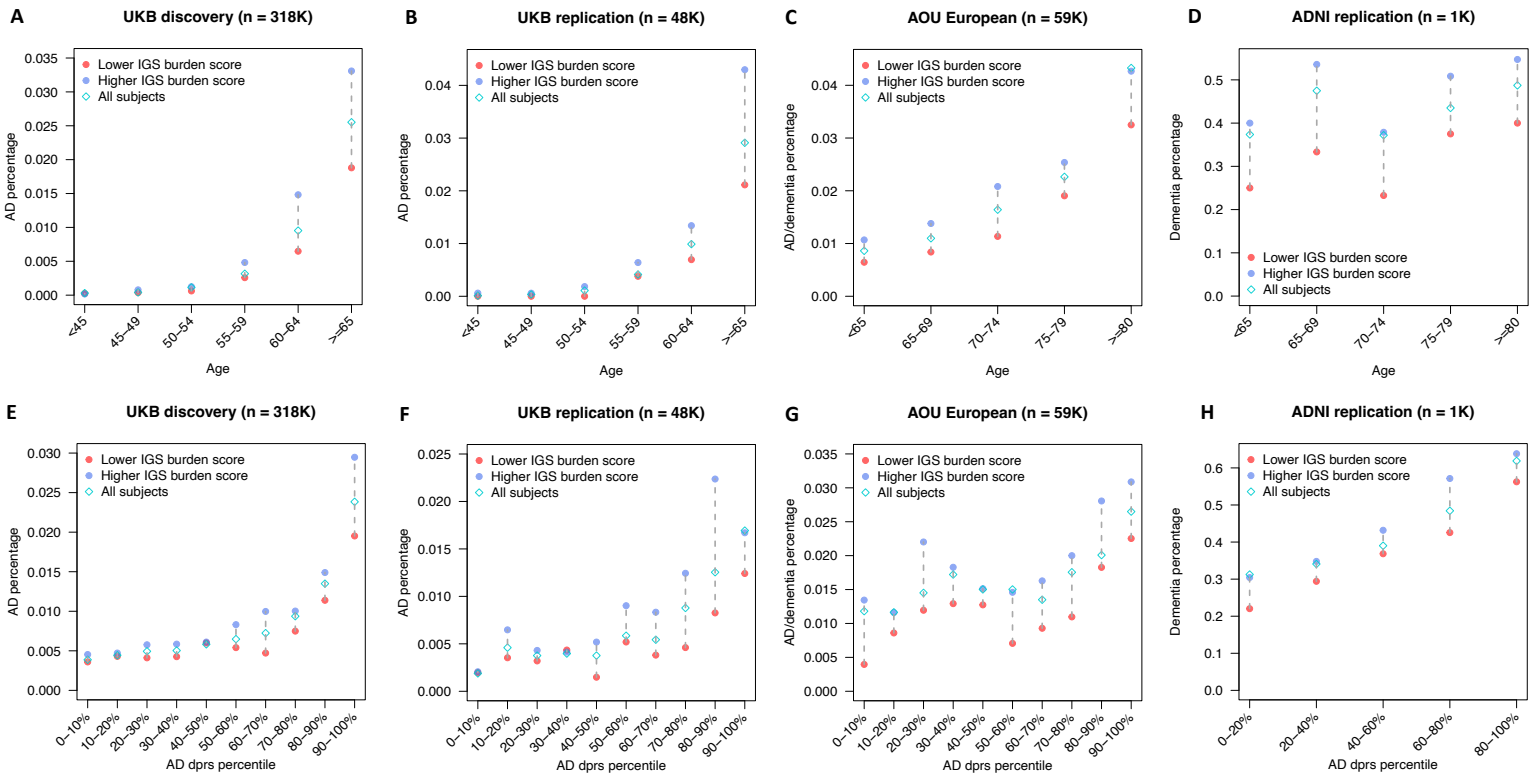

Figure 4

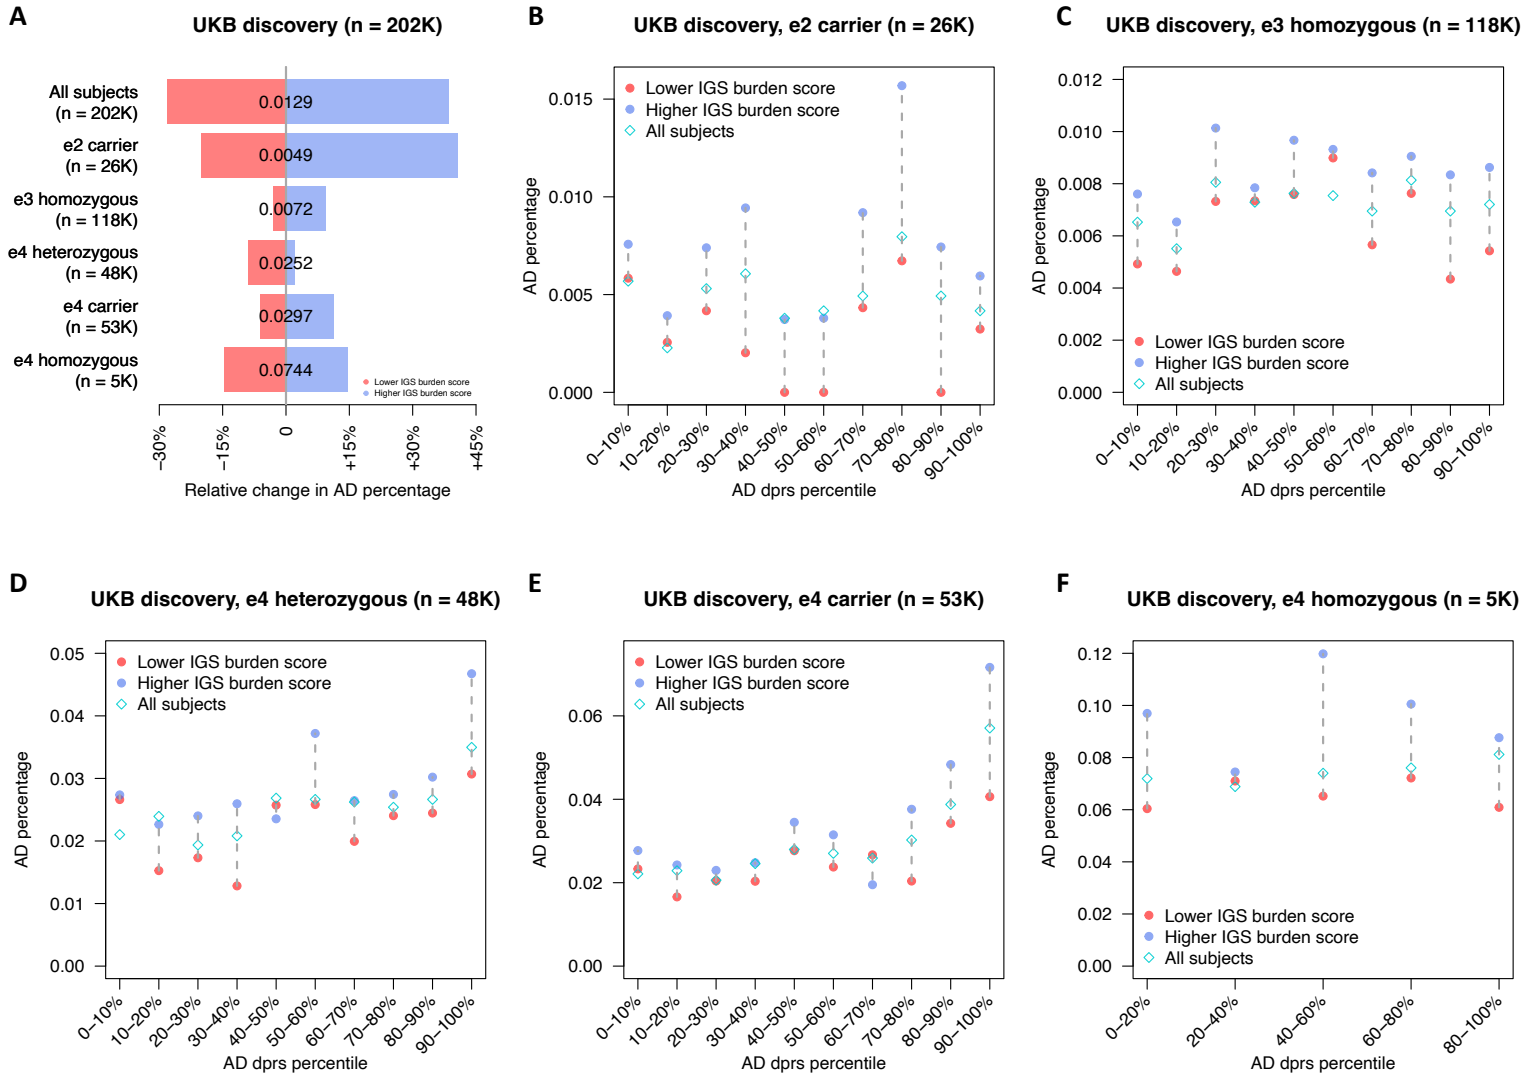

Figure 5

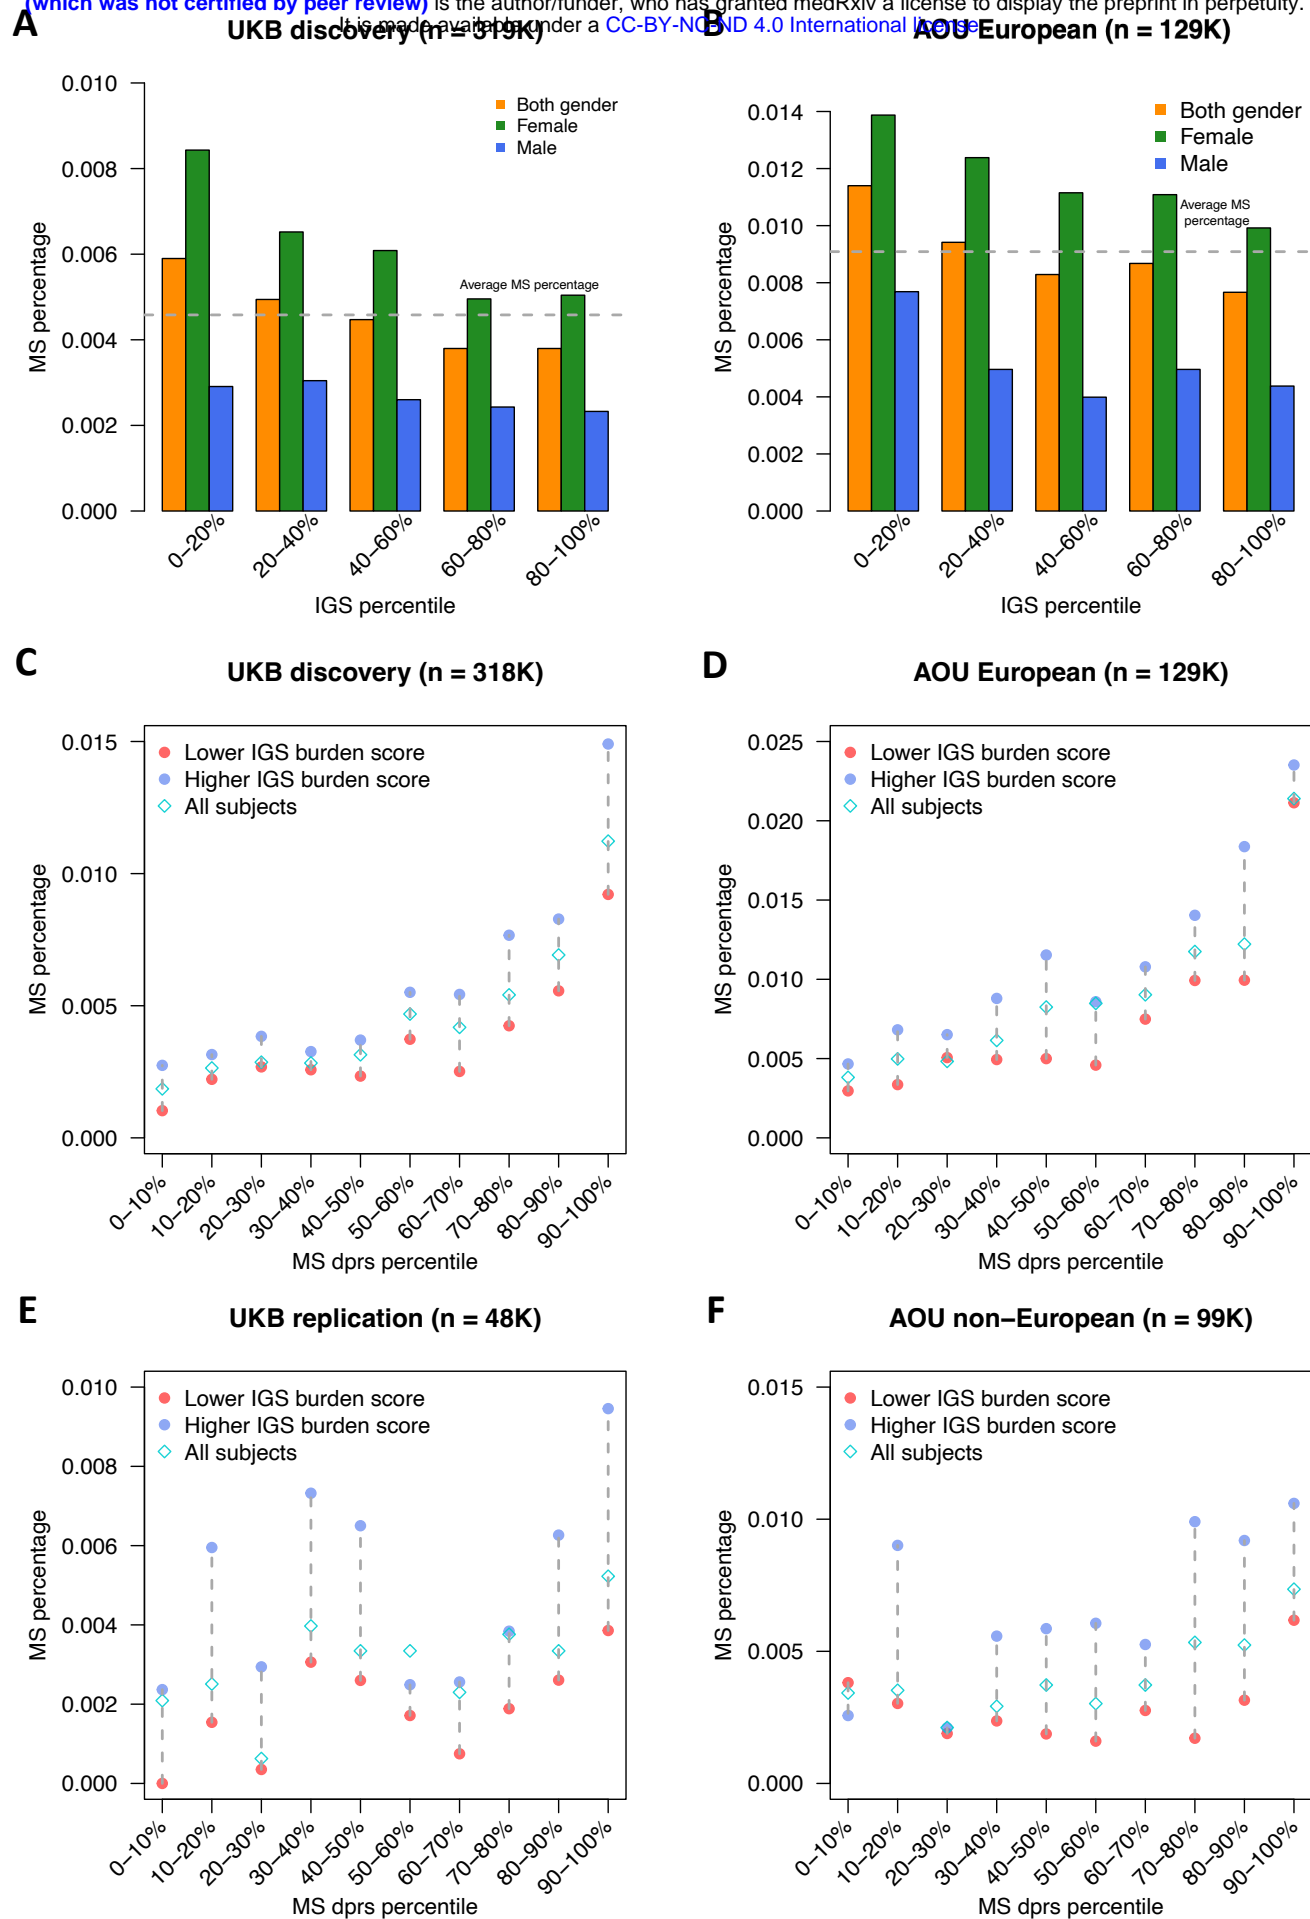

Figure 6
