# Supplementary material for: Multi-organ imaging-derived polygenic indexes for brain and body health
Source: bioRxiv or medRxiv preprint supplement (doi:10.1101/2023.04.18.23288769), 2024-06-03
Supplement: Supplementary file [file media-1.pdf]

## Supplementary Information for

5 **Developing and sharing polygenic risk scores for 4,206 brain imaging-derived phenotypes for 400,000 UK Biobank subjects not participating in the imaging study.**

### 10 **This PDF file includes:**

Figs. S1 to S4  
Legends for Tables S1 to S7

### 15 **Other Supplementary Materials for this manuscript include the following:**

Tables S1 to S7 (.xlsx) (available in a zip file)

20

25

30

35

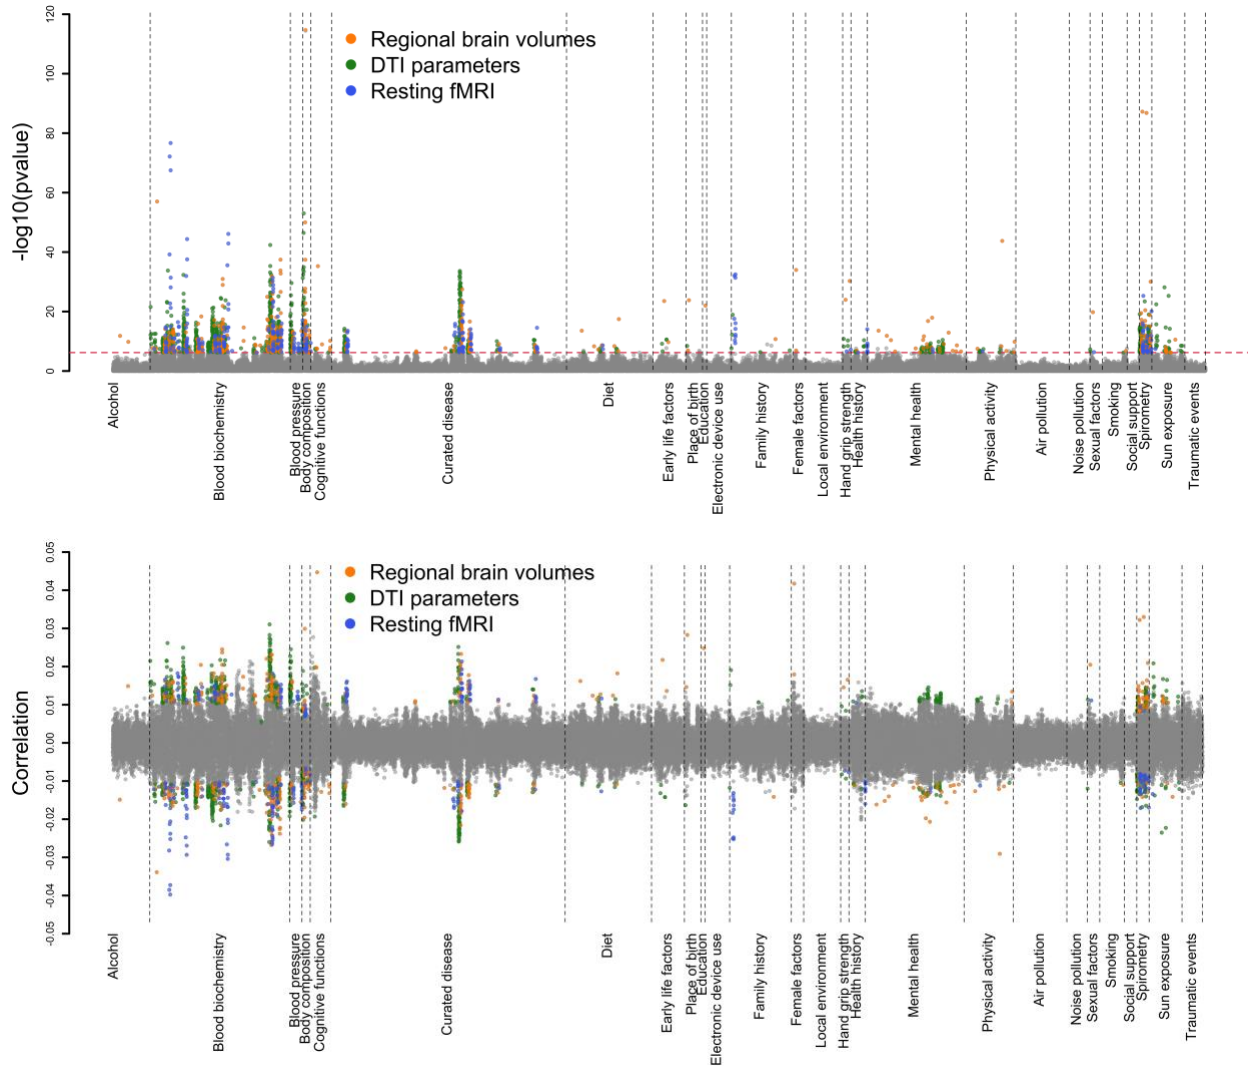

**Fig. S1 BIG-KP PRS-phenotype associations that can be replicated in an independent hold-out sample.** The  $P$  values (upper panel) and correlation coefficients (lower panel) between 265 phenotypes and the PRS of 3 groups of BIG-KP brain MRI traits, including 101 regional brain volumes, 110 DTI parameters, and 90 resting fMRI traits. The Bonferroni-significance level ( $P < 6.27 \times 10^{-7}$ , horizontal line) coefficients replicated in the independent hold-out sample are highlighted in colors. We label the categories of brain imaging traits with different colors.

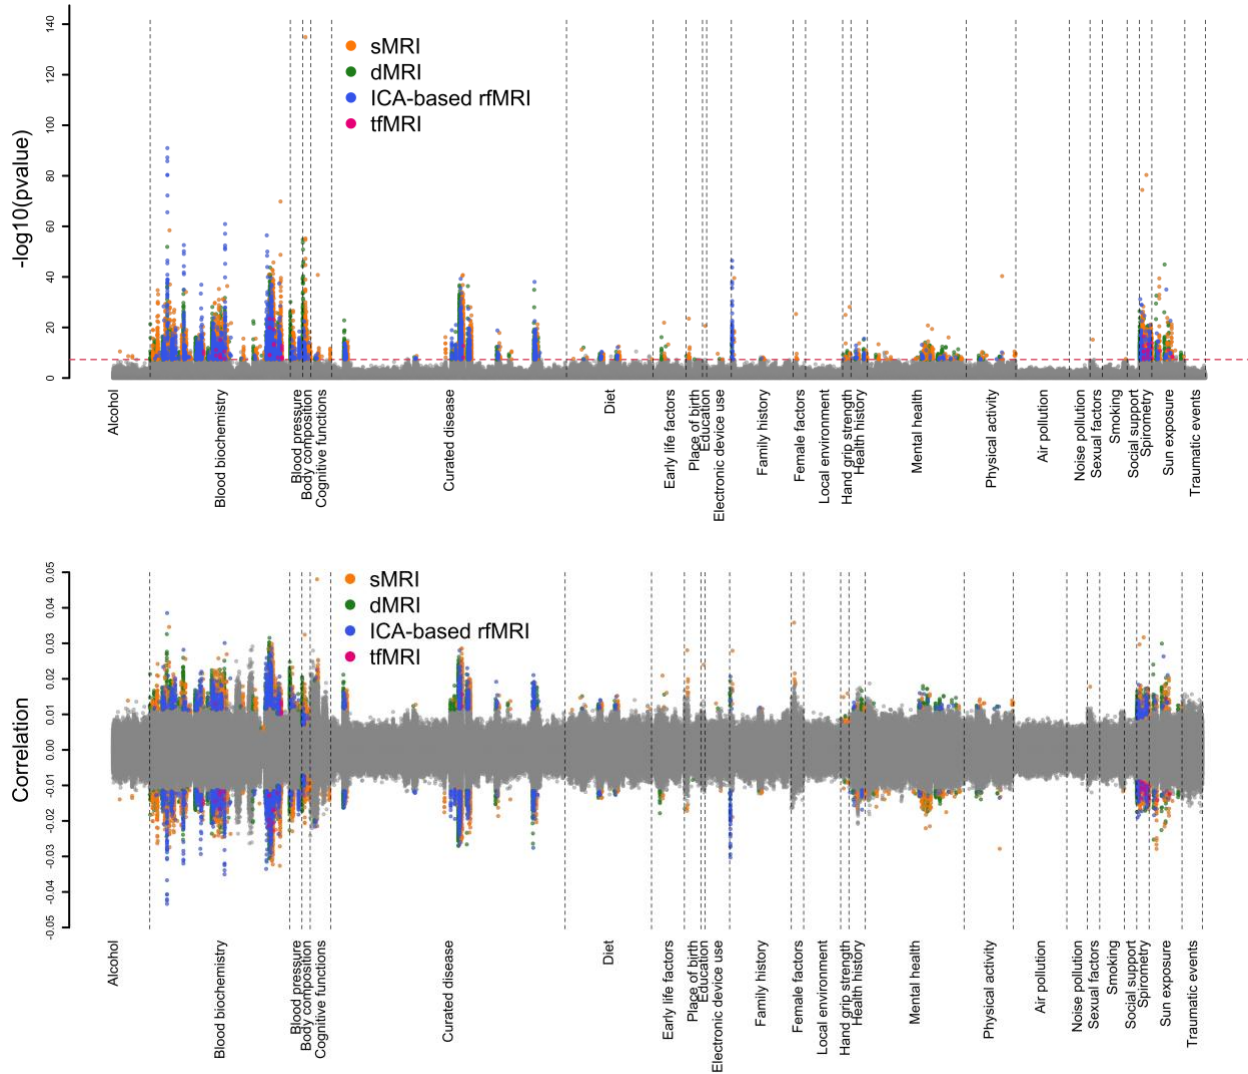

**Fig. S2 UKB-Oxford PRS-phenotype associations that can be replicated in an independent hold-out sample.** The  $P$  values (upper panel) and correlation coefficients (lower panel) between 265 phenotypes and the PRS of 4 groups of brain MRI traits, including 1437 sMRI traits, 675 dMRI traits, 1777 ICA-based rfMRI traits and 16 tfMRI traits. The Bonferroni-significance level ( $P < 4.83 \times 10^{-8}$ , horizontal line) coefficients replicated in the independent hold-out sample are highlighted in colors. We label the categories of brain imaging traits with different colors.

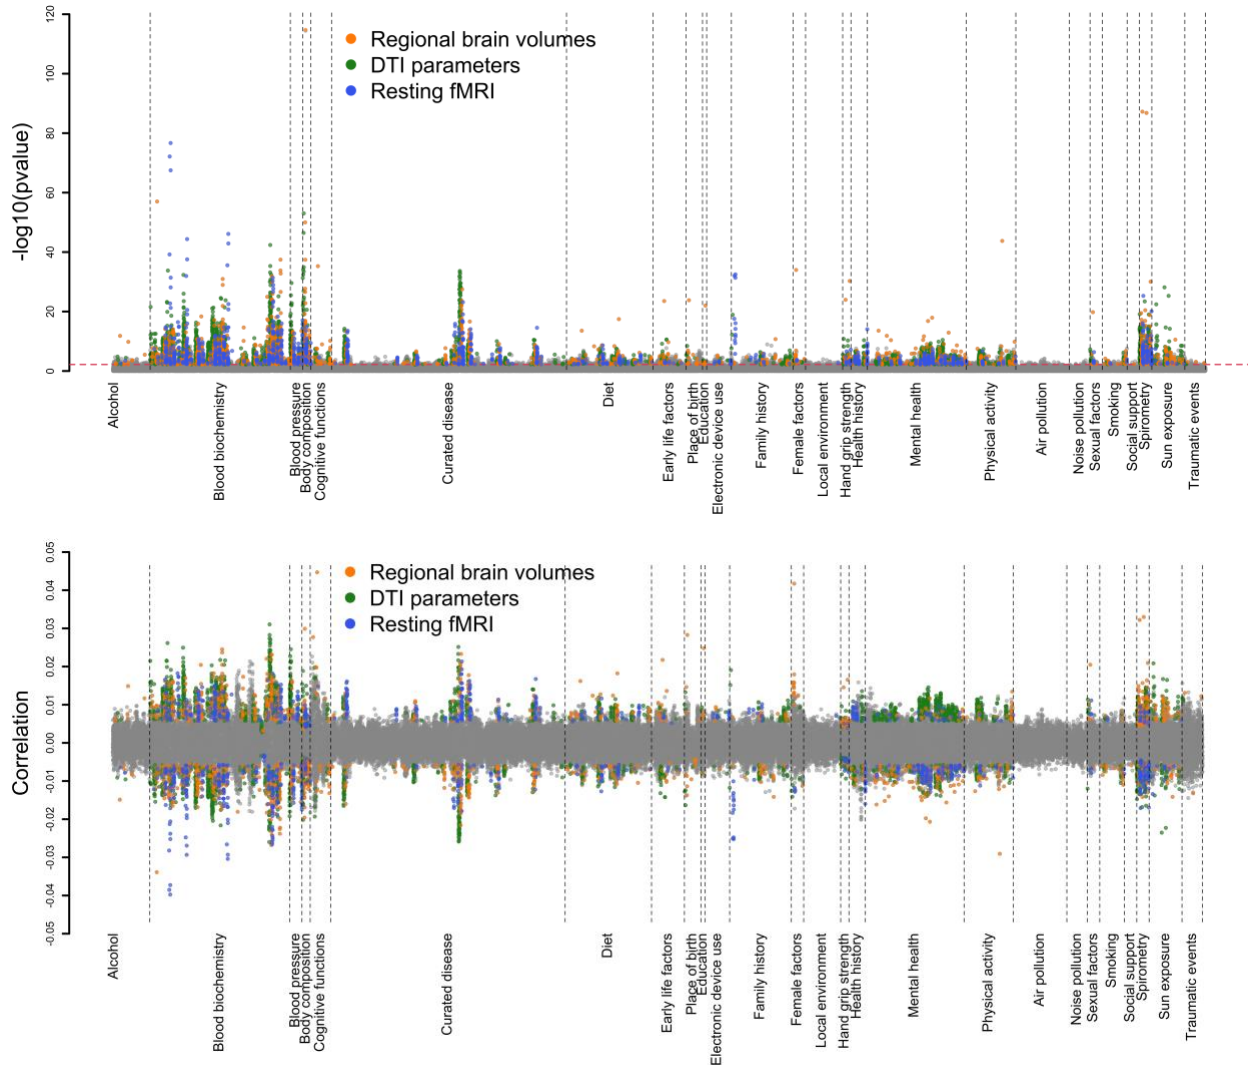

**Fig. S3 BIG-KP PRS-phenotype associations that can be replicated in an independent hold-out sample.** The  $P$  values (upper panel) and correlation coefficients (lower panel) between 265 phenotypes and the PRS of 3 groups of BIG-KP brain MRI traits, including 101 regional brain volumes, 110 DTI parameters, and 90 resting fMRI traits. The FDR-significance level ( $P < 6.38 \times 10^{-4}$ , horizontal line) coefficients replicated in the independent hold-out sample are highlighted in colors. We label the categories of brain imaging traits with different colors.

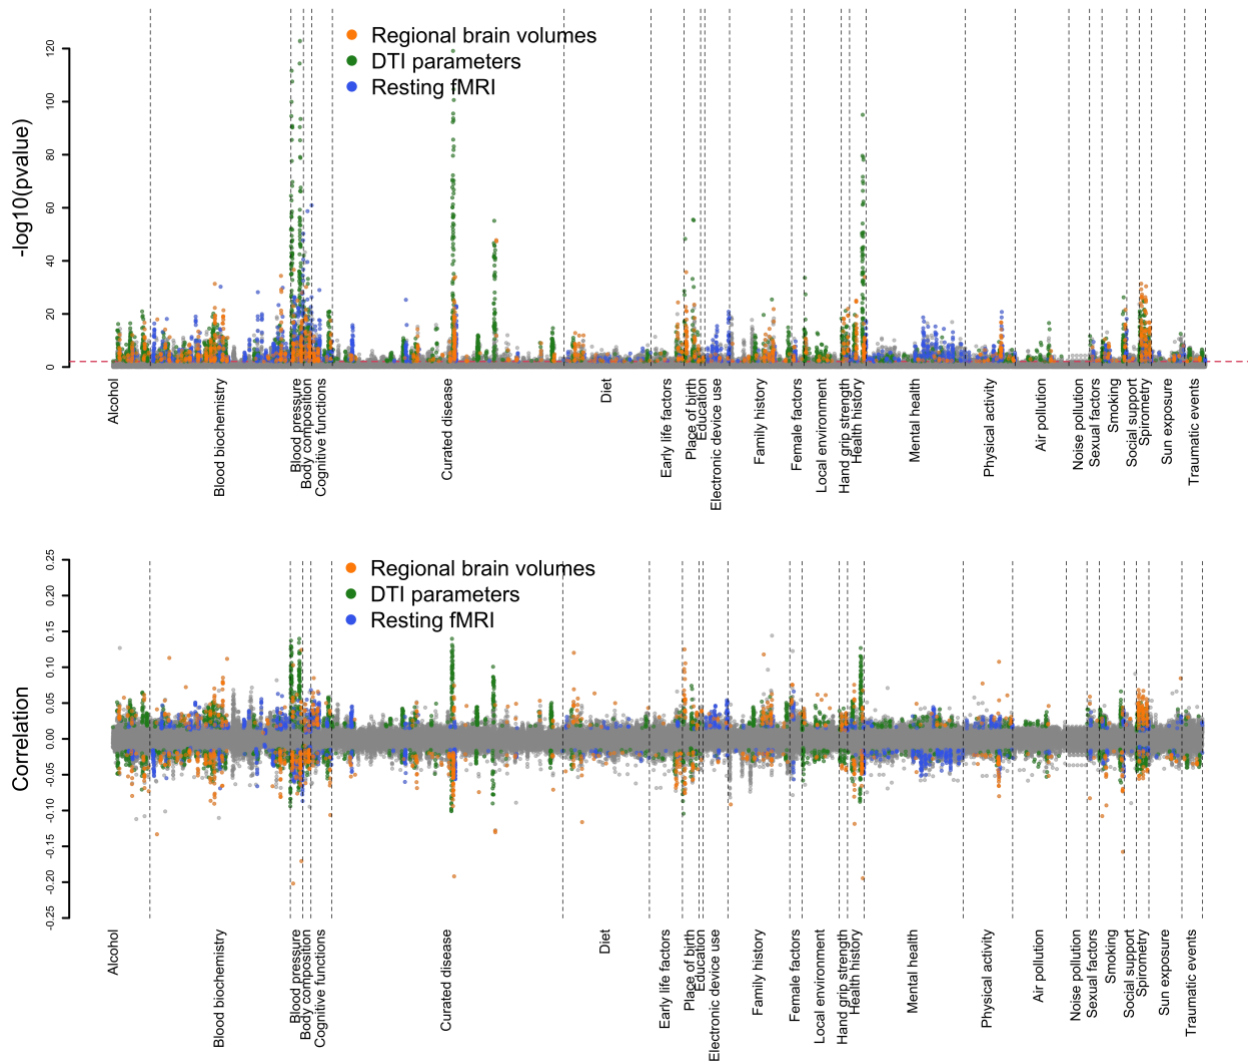

**Fig. S4 BIG-KP imaging-phenotype associations that can be replicated in an independent hold-out sample.** The  $P$  values (upper panel) and correlation coefficients (lower panel) between 265 phenotypes and 3 groups of BIG-KP brain MRI traits, including 101 regional brain volumes, 110 DTI parameters, and 90 resting fMRI traits. The FDR-significance level ( $P < 8.20 \times 10^{-3}$ , horizontal line) coefficients replicated in the independent hold-out sample are highlighted in colors. We label the categories of brain imaging traits with different colors.

**Legends for Tables S1 to S7** (All tables can be found in a zip file).

Table S1. ID of brain imaging traits used in phenotypic association analysis.

5 Table S2. Performance of polygenic risk scores of the 4,206 brain imaging traits.

Table S3. ID of phenotypes used in phenotypic association analysis.

10 Table S4. Bonferroni-significant PRS-phenotype associations between phenotypes and PRS of BIG-KP brain MRI traits.

Table S5. Bonferroni-significant PRS-phenotype associations between phenotypes and PRS of UKB-Oxford brain MRI traits.

15 Table S6. FDR-significant PRS-phenotype associations between phenotypes and PRS of BIG-KP brain MRI traits.

Table S7. FDR-significant imaging-phenotype associations between phenotypes and BIG-KP brain MRI traits.
